# Supplementary material for: High-throughput sorting of eggs for synchronization ofC. elegansin a microfluidic spiral chip
Source: Royal Society of Chemistry journal article supplement (doi:10.1039/c7lc00998d), 2018-01-01
Supplement: c7lc00998d5.stp [file c7lc00998d5.stp]

ISO-10303-21;
HEADER;
/* Generated by software containing ST-Developer
 * from STEP Tools, Inc. (www.steptools.com) 
 */
/* OPTION: using custom schema-name function */

FILE_DESCRIPTION(
/* description */ (''),
/* implementation_level */ '2;1');

FILE_NAME(
/* name */ '171119 220,160,1000 device v3 to Prof. Song',
/* time_stamp */ '2017-11-19T13:52:46-05:00',
/* author */ (''),
/* organization */ (''),
/* preprocessor_version */ 'ST-DEVELOPER v15',
/* originating_system */ '',
/* authorisation */ '');

FILE_SCHEMA (('AUTOMOTIVE_DESIGN'));
ENDSEC;

DATA;
#10=SHAPE_REPRESENTATION_RELATIONSHIP('','',#331,#13);
#11=PRESENTATION_LAYER_ASSIGNMENT('Default','',(#12));
#12=MANIFOLD_SOLID_BREP('brep_1',#14);
#13=ADVANCED_BREP_SHAPE_REPRESENTATION('brep_rep_0',(#12,#338),#330);
#14=CLOSED_SHELL('',(#15,#16,#17,#18,#19,#20,#21,#22,#23,#24,#25,#26,#27,
#28,#29,#30,#31,#32,#33,#34,#35,#36));
#15=ADVANCED_FACE('',(#37),#308,.T.);
#16=ADVANCED_FACE('',(#38),#309,.T.);
#17=ADVANCED_FACE('',(#39),#307,.T.);
#18=ADVANCED_FACE('',(#40),#310,.T.);
#19=ADVANCED_FACE('',(#41),#291,.T.);
#20=ADVANCED_FACE('',(#42),#292,.T.);
#21=ADVANCED_FACE('',(#43),#293,.T.);
#22=ADVANCED_FACE('',(#44),#311,.T.);
#23=ADVANCED_FACE('',(#45),#294,.T.);
#24=ADVANCED_FACE('',(#46),#295,.T.);
#25=ADVANCED_FACE('',(#47),#296,.T.);
#26=ADVANCED_FACE('',(#48),#297,.T.);
#27=ADVANCED_FACE('',(#49),#298,.T.);
#28=ADVANCED_FACE('',(#50),#299,.T.);
#29=ADVANCED_FACE('',(#51),#300,.T.);
#30=ADVANCED_FACE('',(#52),#301,.T.);
#31=ADVANCED_FACE('',(#53),#312,.T.);
#32=ADVANCED_FACE('',(#54),#302,.T.);
#33=ADVANCED_FACE('',(#55),#303,.T.);
#34=ADVANCED_FACE('',(#56),#304,.T.);
#35=ADVANCED_FACE('',(#57),#305,.T.);
#36=ADVANCED_FACE('',(#58),#306,.T.);
#37=FACE_OUTER_BOUND('',#59,.T.);
#38=FACE_OUTER_BOUND('',#60,.T.);
#39=FACE_OUTER_BOUND('',#61,.T.);
#40=FACE_OUTER_BOUND('',#62,.T.);
#41=FACE_OUTER_BOUND('',#63,.T.);
#42=FACE_OUTER_BOUND('',#64,.T.);
#43=FACE_OUTER_BOUND('',#65,.T.);
#44=FACE_OUTER_BOUND('',#66,.T.);
#45=FACE_OUTER_BOUND('',#67,.T.);
#46=FACE_OUTER_BOUND('',#68,.T.);
#47=FACE_OUTER_BOUND('',#69,.T.);
#48=FACE_OUTER_BOUND('',#70,.T.);
#49=FACE_OUTER_BOUND('',#71,.T.);
#50=FACE_OUTER_BOUND('',#72,.T.);
#51=FACE_OUTER_BOUND('',#73,.T.);
#52=FACE_OUTER_BOUND('',#74,.T.);
#53=FACE_OUTER_BOUND('',#75,.T.);
#54=FACE_OUTER_BOUND('',#76,.T.);
#55=FACE_OUTER_BOUND('',#77,.T.);
#56=FACE_OUTER_BOUND('',#78,.T.);
#57=FACE_OUTER_BOUND('',#79,.T.);
#58=FACE_OUTER_BOUND('',#80,.T.);
#59=EDGE_LOOP('',(#81,#82,#83));
#60=EDGE_LOOP('',(#84,#85,#86));
#61=EDGE_LOOP('',(#87,#88,#89,#90));
#62=EDGE_LOOP('',(#91,#92,#93,#94));
#63=EDGE_LOOP('',(#95,#96,#97,#98,#99));
#64=EDGE_LOOP('',(#100,#101,#102,#103));
#65=EDGE_LOOP('',(#104,#105,#106,#107,#108));
#66=EDGE_LOOP('',(#109,#110,#111,#112));
#67=EDGE_LOOP('',(#113,#114,#115,#116));
#68=EDGE_LOOP('',(#117,#118,#119,#120));
#69=EDGE_LOOP('',(#121,#122,#123,#124,#125));
#70=EDGE_LOOP('',(#126,#127,#128,#129));
#71=EDGE_LOOP('',(#130,#131,#132,#133,#134));
#72=EDGE_LOOP('',(#135,#136,#137,#138));
#73=EDGE_LOOP('',(#139,#140,#141,#142));
#74=EDGE_LOOP('',(#143,#144,#145,#146));
#75=EDGE_LOOP('',(#147,#148,#149,#150));
#76=EDGE_LOOP('',(#151,#152,#153,#154,#155));
#77=EDGE_LOOP('',(#156,#157,#158,#159));
#78=EDGE_LOOP('',(#160,#161,#162,#163,#164));
#79=EDGE_LOOP('',(#165,#166,#167,#168));
#80=EDGE_LOOP('',(#169,#170,#171,#172));
#81=ORIENTED_EDGE('',*,*,#179,.F.);
#82=ORIENTED_EDGE('',*,*,#176,.F.);
#83=ORIENTED_EDGE('',*,*,#173,.T.);
#84=ORIENTED_EDGE('',*,*,#174,.F.);
#85=ORIENTED_EDGE('',*,*,#178,.T.);
#86=ORIENTED_EDGE('',*,*,#180,.T.);
#87=ORIENTED_EDGE('',*,*,#179,.T.);
#88=ORIENTED_EDGE('',*,*,#175,.T.);
#89=ORIENTED_EDGE('',*,*,#180,.F.);
#90=ORIENTED_EDGE('',*,*,#177,.F.);
#91=ORIENTED_EDGE('',*,*,#188,.T.);
#92=ORIENTED_EDGE('',*,*,#185,.T.);
#93=ORIENTED_EDGE('',*,*,#184,.T.);
#94=ORIENTED_EDGE('',*,*,#183,.T.);
#95=ORIENTED_EDGE('',*,*,#187,.F.);
#96=ORIENTED_EDGE('',*,*,#186,.T.);
#97=ORIENTED_EDGE('',*,*,#188,.F.);
#98=ORIENTED_EDGE('',*,*,#216,.F.);
#99=ORIENTED_EDGE('',*,*,#178,.F.);
#100=ORIENTED_EDGE('',*,*,#189,.T.);
#101=ORIENTED_EDGE('',*,*,#185,.F.);
#102=ORIENTED_EDGE('',*,*,#186,.F.);
#103=ORIENTED_EDGE('',*,*,#181,.F.);
#104=ORIENTED_EDGE('',*,*,#176,.T.);
#105=ORIENTED_EDGE('',*,*,#215,.T.);
#106=ORIENTED_EDGE('',*,*,#184,.F.);
#107=ORIENTED_EDGE('',*,*,#189,.F.);
#108=ORIENTED_EDGE('',*,*,#182,.F.);
#109=ORIENTED_EDGE('',*,*,#190,.T.);
#110=ORIENTED_EDGE('',*,*,#194,.T.);
#111=ORIENTED_EDGE('',*,*,#192,.T.);
#112=ORIENTED_EDGE('',*,*,#191,.T.);
#113=ORIENTED_EDGE('',*,*,#207,.T.);
#114=ORIENTED_EDGE('',*,*,#202,.F.);
#115=ORIENTED_EDGE('',*,*,#208,.F.);
#116=ORIENTED_EDGE('',*,*,#181,.T.);
#117=ORIENTED_EDGE('',*,*,#202,.T.);
#118=ORIENTED_EDGE('',*,*,#195,.T.);
#119=ORIENTED_EDGE('',*,*,#190,.F.);
#120=ORIENTED_EDGE('',*,*,#205,.F.);
#121=ORIENTED_EDGE('',*,*,#196,.F.);
#122=ORIENTED_EDGE('',*,*,#198,.T.);
#123=ORIENTED_EDGE('',*,*,#197,.F.);
#124=ORIENTED_EDGE('',*,*,#207,.F.);
#125=ORIENTED_EDGE('',*,*,#187,.T.);
#126=ORIENTED_EDGE('',*,*,#200,.T.);
#127=ORIENTED_EDGE('',*,*,#199,.F.);
#128=ORIENTED_EDGE('',*,*,#198,.F.);
#129=ORIENTED_EDGE('',*,*,#193,.F.);
#130=ORIENTED_EDGE('',*,*,#208,.T.);
#131=ORIENTED_EDGE('',*,*,#201,.F.);
#132=ORIENTED_EDGE('',*,*,#200,.F.);
#133=ORIENTED_EDGE('',*,*,#206,.F.);
#134=ORIENTED_EDGE('',*,*,#182,.T.);
#135=ORIENTED_EDGE('',*,*,#203,.T.);
#136=ORIENTED_EDGE('',*,*,#194,.F.);
#137=ORIENTED_EDGE('',*,*,#195,.F.);
#138=ORIENTED_EDGE('',*,*,#197,.T.);
#139=ORIENTED_EDGE('',*,*,#204,.T.);
#140=ORIENTED_EDGE('',*,*,#192,.F.);
#141=ORIENTED_EDGE('',*,*,#203,.F.);
#142=ORIENTED_EDGE('',*,*,#199,.T.);
#143=ORIENTED_EDGE('',*,*,#205,.T.);
#144=ORIENTED_EDGE('',*,*,#191,.F.);
#145=ORIENTED_EDGE('',*,*,#204,.F.);
#146=ORIENTED_EDGE('',*,*,#201,.T.);
#147=ORIENTED_EDGE('',*,*,#210,.F.);
#148=ORIENTED_EDGE('',*,*,#211,.F.);
#149=ORIENTED_EDGE('',*,*,#212,.F.);
#150=ORIENTED_EDGE('',*,*,#209,.F.);
#151=ORIENTED_EDGE('',*,*,#196,.T.);
#152=ORIENTED_EDGE('',*,*,#174,.T.);
#153=ORIENTED_EDGE('',*,*,#217,.T.);
#154=ORIENTED_EDGE('',*,*,#212,.T.);
#155=ORIENTED_EDGE('',*,*,#213,.F.);
#156=ORIENTED_EDGE('',*,*,#193,.T.);
#157=ORIENTED_EDGE('',*,*,#213,.T.);
#158=ORIENTED_EDGE('',*,*,#211,.T.);
#159=ORIENTED_EDGE('',*,*,#214,.F.);
#160=ORIENTED_EDGE('',*,*,#206,.T.);
#161=ORIENTED_EDGE('',*,*,#214,.T.);
#162=ORIENTED_EDGE('',*,*,#210,.T.);
#163=ORIENTED_EDGE('',*,*,#218,.F.);
#164=ORIENTED_EDGE('',*,*,#173,.F.);
#165=ORIENTED_EDGE('',*,*,#177,.T.);
#166=ORIENTED_EDGE('',*,*,#216,.T.);
#167=ORIENTED_EDGE('',*,*,#183,.F.);
#168=ORIENTED_EDGE('',*,*,#215,.F.);
#169=ORIENTED_EDGE('',*,*,#218,.T.);
#170=ORIENTED_EDGE('',*,*,#209,.T.);
#171=ORIENTED_EDGE('',*,*,#217,.F.);
#172=ORIENTED_EDGE('',*,*,#175,.F.);
#173=EDGE_CURVE('',#267,#265,#221,.T.);
#174=EDGE_CURVE('',#270,#268,#222,.T.);
#175=EDGE_CURVE('',#265,#268,#223,.T.);
#176=EDGE_CURVE('',#267,#266,#224,.T.);
#177=EDGE_CURVE('',#266,#269,#225,.T.);
#178=EDGE_CURVE('',#270,#269,#226,.T.);
#179=EDGE_CURVE('',#266,#265,#219,.T.);
#180=EDGE_CURVE('',#269,#268,#220,.T.);
#181=EDGE_CURVE('',#272,#271,#227,.T.);
#182=EDGE_CURVE('',#267,#272,#228,.T.);
#183=EDGE_CURVE('',#274,#273,#229,.T.);
#184=EDGE_CURVE('',#275,#274,#230,.T.);
#185=EDGE_CURVE('',#276,#275,#231,.T.);
#186=EDGE_CURVE('',#271,#276,#232,.T.);
#187=EDGE_CURVE('',#271,#270,#233,.T.);
#188=EDGE_CURVE('',#273,#276,#234,.T.);
#189=EDGE_CURVE('',#272,#275,#235,.T.);
#190=EDGE_CURVE('',#277,#280,#236,.T.);
#191=EDGE_CURVE('',#278,#277,#237,.T.);
#192=EDGE_CURVE('',#279,#278,#238,.T.);
#193=EDGE_CURVE('',#282,#281,#239,.T.);
#194=EDGE_CURVE('',#280,#279,#240,.T.);
#195=EDGE_CURVE('',#283,#280,#241,.T.);
#196=EDGE_CURVE('',#281,#270,#242,.T.);
#197=EDGE_CURVE('',#283,#284,#243,.T.);
#198=EDGE_CURVE('',#281,#284,#244,.T.);
#199=EDGE_CURVE('',#284,#285,#245,.T.);
#200=EDGE_CURVE('',#282,#285,#246,.T.);
#201=EDGE_CURVE('',#285,#286,#247,.T.);
#202=EDGE_CURVE('',#286,#283,#248,.T.);
#203=EDGE_CURVE('',#284,#279,#249,.T.);
#204=EDGE_CURVE('',#285,#278,#250,.T.);
#205=EDGE_CURVE('',#286,#277,#251,.T.);
#206=EDGE_CURVE('',#267,#282,#252,.T.);
#207=EDGE_CURVE('',#271,#283,#253,.T.);
#208=EDGE_CURVE('',#272,#286,#254,.T.);
#209=EDGE_CURVE('',#287,#290,#255,.T.);
#210=EDGE_CURVE('',#288,#287,#256,.T.);
#211=EDGE_CURVE('',#289,#288,#257,.T.);
#212=EDGE_CURVE('',#290,#289,#258,.T.);
#213=EDGE_CURVE('',#281,#289,#259,.T.);
#214=EDGE_CURVE('',#282,#288,#260,.T.);
#215=EDGE_CURVE('',#266,#274,#261,.T.);
#216=EDGE_CURVE('',#269,#273,#262,.T.);
#217=EDGE_CURVE('',#268,#290,#263,.T.);
#218=EDGE_CURVE('',#265,#287,#264,.T.);
#219=(
BOUNDED_CURVE()
B_SPLINE_CURVE(2,(#2666,#2667,#2668,#2669,#2670),.UNSPECIFIED.,.F.,.F.)
B_SPLINE_CURVE_WITH_KNOTS((3,2,3),(-0.722423904147025,-0.53621195207351,
-0.349999999999994),.UNSPECIFIED.)
CURVE()
GEOMETRIC_REPRESENTATION_ITEM()
RATIONAL_B_SPLINE_CURVE((1.,0.893583829780912,1.,0.893583829780912,1.))
REPRESENTATION_ITEM('')
);
#220=(
BOUNDED_CURVE()
B_SPLINE_CURVE(2,(#2671,#2672,#2673,#2674,#2675),.UNSPECIFIED.,.F.,.F.)
B_SPLINE_CURVE_WITH_KNOTS((3,2,3),(-0.722423904147025,-0.53621195207351,
-0.349999999999994),.UNSPECIFIED.)
CURVE()
GEOMETRIC_REPRESENTATION_ITEM()
RATIONAL_B_SPLINE_CURVE((1.,0.893583829780912,1.,0.893583829780912,1.))
REPRESENTATION_ITEM('')
);
#221=B_SPLINE_CURVE_WITH_KNOTS('',1,(#2654,#2655),.UNSPECIFIED.,.F.,.F.,
(2,2),(1.02470943148801,1.37470943148801),.UNSPECIFIED.);
#222=B_SPLINE_CURVE_WITH_KNOTS('',1,(#2656,#2657),.UNSPECIFIED.,.F.,.F.,
(2,2),(1.02470943148801,1.37470943148801),.UNSPECIFIED.);
#223=B_SPLINE_CURVE_WITH_KNOTS('',1,(#2658,#2659),.UNSPECIFIED.,.F.,.F.,
(2,2),(0.,0.175),.UNSPECIFIED.);
#224=B_SPLINE_CURVE_WITH_KNOTS('',1,(#2660,#2661),.UNSPECIFIED.,.F.,.F.,
(2,2),(-1.02470943148801,-0.722423904147025),.UNSPECIFIED.);
#225=B_SPLINE_CURVE_WITH_KNOTS('',1,(#2662,#2663),.UNSPECIFIED.,.F.,.F.,
(2,2),(0.,0.175),.UNSPECIFIED.);
#226=B_SPLINE_CURVE_WITH_KNOTS('',1,(#2664,#2665),.UNSPECIFIED.,.F.,.F.,
(2,2),(-1.02470943148801,-0.722423904147025),.UNSPECIFIED.);
#227=B_SPLINE_CURVE_WITH_KNOTS('',1,(#2676,#2677),.UNSPECIFIED.,.F.,.F.,
(2,2),(2.17511656492057,2.33511656492149),.UNSPECIFIED.);
#228=B_SPLINE_CURVE_WITH_KNOTS('',1,(#2678,#2679),.UNSPECIFIED.,.F.,.F.,
(2,2),(1.17511452917494,2.17511656492057),.UNSPECIFIED.);
#229=B_SPLINE_CURVE_WITH_KNOTS('',1,(#2680,#2681),.UNSPECIFIED.,.F.,.F.,
(2,2),(3.49511860066803,3.67011860066803),.UNSPECIFIED.);
#230=B_SPLINE_CURVE_WITH_KNOTS('',1,(#2682,#2683),.UNSPECIFIED.,.F.,.F.,
(2,2),(2.4951165649224,3.49511860066803),.UNSPECIFIED.);
#231=B_SPLINE_CURVE_WITH_KNOTS('',1,(#2684,#2685),.UNSPECIFIED.,.F.,.F.,
(2,2),(2.33511656492149,2.4951165649224),.UNSPECIFIED.);
#232=B_SPLINE_CURVE_WITH_KNOTS('',3,(#2686,#2687,#2688,#2689),
 .UNSPECIFIED.,.F.,.F.,(4,4),(0.,3.81608438061844),.UNSPECIFIED.);
#233=B_SPLINE_CURVE_WITH_KNOTS('',1,(#2690,#2691),.UNSPECIFIED.,.F.,.F.,
(2,2),(-2.33511656492149,-1.33500203574655),.UNSPECIFIED.);
#234=B_SPLINE_CURVE_WITH_KNOTS('',1,(#2692,#2693),.UNSPECIFIED.,.F.,.F.,
(2,2),(1.33500203574655,2.33511656492149),.UNSPECIFIED.);
#235=B_SPLINE_CURVE_WITH_KNOTS('',3,(#2694,#2695,#2696,#2697),
 .UNSPECIFIED.,.F.,.F.,(4,4),(0.,3.81608438061844),.UNSPECIFIED.);
#236=B_SPLINE_CURVE_WITH_KNOTS('',1,(#2698,#2699),.UNSPECIFIED.,.F.,.F.,
(2,2),(2.38179838290946,2.54179838290946),.UNSPECIFIED.);
#237=B_SPLINE_CURVE_WITH_KNOTS('',1,(#2700,#2701),.UNSPECIFIED.,.F.,.F.,
(2,2),(3.76359676581891,4.76359676581891),.UNSPECIFIED.);
#238=B_SPLINE_CURVE_WITH_KNOTS('',1,(#2702,#2703),.UNSPECIFIED.,.F.,.F.,
(2,2),(3.54359676581891,3.76359676581891),.UNSPECIFIED.);
#239=B_SPLINE_CURVE_WITH_KNOTS('',1,(#2704,#2705),.UNSPECIFIED.,.F.,.F.,
(2,2),(-1.38179838290945,-1.16179838290946),.UNSPECIFIED.);
#240=B_SPLINE_CURVE_WITH_KNOTS('',1,(#2706,#2707),.UNSPECIFIED.,.F.,.F.,
(2,2),(0.16,1.16179838290946),.UNSPECIFIED.);
#241=B_SPLINE_CURVE_WITH_KNOTS('',3,(#2708,#2709,#2710,#2711,#2712,#2713,
#2714,#2715,#2716,#2717,#2718,#2719,#2720,#2721,#2722),.UNSPECIFIED.,.F.,
 .F.,(4,1,1,1,1,1,1,1,1,1,1,1,4),(452.47015230783,453.940290359542,454.72835395173,
455.533200308334,456.338046664938,457.126110257126,458.596248308839,460.066386360552,
460.85444995274,461.659296309344,462.464142665948,463.252206258136,464.722344309848),
 .UNSPECIFIED.);
#242=B_SPLINE_CURVE_WITH_KNOTS('',1,(#2723,#2724),.UNSPECIFIED.,.F.,.F.,
(2,2),(-1.16179838290946,-0.410449595727364),.UNSPECIFIED.);
#243=B_SPLINE_CURVE_WITH_KNOTS('',1,(#2725,#2726),.UNSPECIFIED.,.F.,.F.,
(2,2),(0.16,1.16179838290946),.UNSPECIFIED.);
#244=B_SPLINE_CURVE_WITH_KNOTS('',3,(#2727,#2728,#2729,#2730,#2731,#2732,
#2733,#2734,#2735,#2736,#2737,#2738,#2739,#2740,#2741,#2742,#2743,#2744,
#2745,#2746,#2747,#2748,#2749,#2750,#2751,#2752,#2753,#2754,#2755,#2756,
#2757,#2758,#2759,#2760,#2761,#2762,#2763,#2764,#2765,#2766,#2767,#2768,
#2769,#2770,#2771,#2772,#2773,#2774,#2775,#2776,#2777,#2778,#2779,#2780,
#2781,#2782,#2783,#2784,#2785,#2786,#2787,#2788,#2789,#2790,#2791,#2792,
#2793,#2794,#2795,#2796,#2797,#2798,#2799,#2800,#2801,#2802,#2803,#2804,
#2805,#2806,#2807,#2808,#2809,#2810,#2811,#2812,#2813,#2814,#2815,#2816,
#2817,#2818,#2819,#2820,#2821,#2822,#2823,#2824,#2825,#2826,#2827,#2828,
#2829,#2830,#2831,#2832,#2833,#2834,#2835,#2836,#2837,#2838,#2839,#2840,
#2841,#2842,#2843,#2844,#2845,#2846,#2847,#2848,#2849,#2850,#2851,#2852,
#2853,#2854,#2855,#2856,#2857,#2858,#2859,#2860,#2861,#2862,#2863,#2864,
#2865,#2866,#2867,#2868,#2869,#2870,#2871,#2872,#2873,#2874,#2875,#2876,
#2877,#2878,#2879,#2880,#2881,#2882,#2883,#2884,#2885,#2886,#2887,#2888,
#2889,#2890,#2891,#2892,#2893,#2894,#2895,#2896,#2897,#2898,#2899,#2900,
#2901,#2902,#2903,#2904,#2905,#2906,#2907,#2908,#2909,#2910,#2911,#2912,
#2913,#2914,#2915,#2916,#2917,#2918,#2919,#2920,#2921,#2922,#2923,#2924,
#2925,#2926,#2927,#2928,#2929,#2930,#2931,#2932,#2933,#2934,#2935,#2936,
#2937,#2938,#2939,#2940,#2941,#2942,#2943,#2944,#2945,#2946,#2947,#2948,
#2949,#2950,#2951,#2952,#2953,#2954,#2955,#2956,#2957,#2958,#2959,#2960,
#2961,#2962,#2963,#2964,#2965,#2966,#2967,#2968,#2969,#2970,#2971,#2972,
#2973,#2974,#2975,#2976,#2977,#2978,#2979,#2980,#2981,#2982,#2983,#2984,
#2985,#2986),.UNSPECIFIED.,.F.,.F.,(4,1,1,1,1,1,1,1,1,1,1,1,1,1,1,1,1,1,
1,1,1,1,1,1,1,1,1,1,1,1,1,1,1,1,1,1,1,1,1,1,1,1,1,1,1,1,1,1,1,1,1,1,1,1,
1,1,1,1,1,1,1,1,1,1,1,1,1,1,1,1,1,1,1,1,1,1,1,1,1,1,1,1,1,1,1,1,1,1,1,1,
1,1,1,1,1,1,1,1,1,1,1,1,1,1,1,1,1,1,1,1,1,1,1,1,1,1,1,1,1,1,1,1,1,1,1,1,
1,1,1,1,1,1,1,1,1,1,1,1,1,1,1,1,1,1,1,1,1,1,1,1,1,1,1,1,1,1,1,1,1,1,1,1,
1,1,1,1,1,1,1,1,1,1,1,1,1,1,1,1,1,1,1,1,1,1,1,1,1,1,1,1,1,1,1,1,1,1,1,1,
1,1,1,1,1,1,1,1,1,1,1,1,1,1,1,1,1,1,1,1,1,1,1,1,1,1,1,1,1,1,1,1,1,1,1,1,
1,1,1,1,1,1,1,1,1,1,1,1,1,1,1,1,1,1,1,1,1,1,1,4),(0.,2.38245729200542,3.57414362987012,
4.76260100467874,7.13566214604912,9.50486281200516,11.868928832239,14.2282367671153,
16.5827023057934,18.9323341421039,21.277134201622,23.6171021887677,25.9522397315031,
28.2825472654474,30.6080239148339,32.9286677976576,35.2444786213747,37.5554572801613,
39.8616050054091,42.1629226439068,44.4594099544073,46.751065191794,49.0378872990536,
51.3198768336143,53.5970349675632,55.8693627718404,58.1368605152281,60.3995270052688,
62.6573605546397,64.9103612257518,67.1585300252716,69.4018681348511,71.6403762148608,
73.8740537200632,76.1028988043993,78.3269108464278,80.5460905839764,82.7604392002953,
84.9699576325252,87.1746458921129,89.3745025057265,91.569526111547,93.7597170583455,
95.9450764256591,98.125605316385,100.301304181937,102.472172162778,104.638207470078,
106.799409880282,108.955780267707,111.107319793796,113.254029237018,115.3959083347,
117.532955410509,119.66516950649,121.792551191154,123.915101581088,126.032821672705,
128.145711688826,130.25377046685,132.356996425579,134.455389676882,136.548951192886,
138.637682082648,140.72158294347,142.800653224162,144.874891164706,146.94429622969,
149.008869150976,151.068611048765,153.123522787642,155.173604344579,157.218854295779,
159.259271385602,161.29485599272,163.325609150779,165.351531888248,167.372624601161,
169.388886441204,171.400315718734,173.406912279035,175.408676975301,177.405610900292,
179.397714763808,181.384988282099,183.367429847722,185.345038601934,187.317815124491,
189.285760476652,191.248875580489,193.207160613039,195.160614441731,197.109235591651,
199.053024224294,200.991981277427,202.926107787706,204.855404289564,206.779870226042,
208.699503923347,210.614304932263,212.524273978882,214.429412120556,216.329720149529,
218.225198008502,220.115844323414,222.001657944987,223.882639281992,225.758789322398,
227.630109020475,229.4965987171,231.3582575754,233.215084005127,235.067077920604,
236.914240154133,238.75657173003,240.594073289668,242.42674452846,244.254583908084,
246.077590669224,247.895765403118,249.709109115952,251.517622655718,253.321306153933,
255.120158508307,256.914178350452,258.703365891728,260.487722035817,262.267247747252,
264.041943497882,265.811808725263,267.576841842083,269.337042485588,271.092411376377,
272.842949509258,274.588657604438,276.329535570657,278.065582083882,279.796796101477,
281.52317806261,283.244728909889,284.961449523716,286.673340190148,288.380400084083,
290.082627714969,291.780023066484,293.472586950373,295.160320322865,296.843223757271,
298.521296928527,300.194538367774,301.862947415455,303.52652467465,305.185271096851,
306.839187456362,308.488273839576,310.132529174869,311.771952200738,313.406543178792,
315.036302979025,316.661232494277,318.281332134243,319.896601331416,321.507038585374,
323.112643620224,324.713417151504,326.309360111931,327.900473150148,329.486756141401,
331.068207812136,332.644827226795,334.216614855397,335.783571595684,337.345698254695,
338.902995064183,340.455461211314,342.003095305723,343.545897400926,345.083868288635,
346.61700885754,348.145319613451,349.668800211388,351.187449252492,352.701266177494,
354.210251601871,355.714406423013,357.213731342151,358.708226401169,360.197890559713,
361.682722663742,363.16272302571,364.637892482564,366.108231856115,367.573741494579,
369.034420826059,370.490268437672,371.941284141026,373.387468647284,374.828822827795,
376.265347260378,377.697041787529,379.123905186902,380.545936630721,381.963136620591,
383.375506010169,384.783045533945,386.185755370186,387.583634719144,388.97668229142,
390.364898211163,391.748283250902,393.126838232671,394.500563595686,395.869458975951,
397.233523045497,398.592755346206,399.947156506868,401.296727371737,402.641468569965,
403.981380099931,405.316460953543,406.64671008519,407.972127859158,409.292715080402,
410.608472500791,411.919400408179,413.225498227392,414.526764634166,415.823199528695,
417.11480361891,418.401577715991,419.683522328164,420.960637266417,422.232921360834,
423.50037389262,424.762995396215,426.020786682502,427.273748414782,428.52188071922,
429.765182810533,431.003653501635,432.237292988675,433.466102026433,434.690081371794,
435.909231398916,437.123551726338,438.333041098503,439.537699159955,440.737526554376,
441.932524074545,443.122692279243,444.308031125082,445.488539637957,446.664216882383,
447.835063276216,449.001079594246,450.162266520309,451.318624234112,452.47015230783),
 .UNSPECIFIED.);
#245=B_SPLINE_CURVE_WITH_KNOTS('',1,(#2987,#2988),.UNSPECIFIED.,.F.,.F.,
(2,2),(1.16179838290946,1.38179838290946),.UNSPECIFIED.);
#246=B_SPLINE_CURVE_WITH_KNOTS('',3,(#2989,#2990,#2991,#2992,#2993,#2994,
#2995,#2996,#2997,#2998,#2999,#3000,#3001,#3002,#3003,#3004,#3005,#3006,
#3007,#3008,#3009,#3010,#3011,#3012,#3013,#3014,#3015,#3016,#3017,#3018,
#3019,#3020,#3021,#3022,#3023,#3024,#3025,#3026,#3027,#3028,#3029,#3030,
#3031,#3032,#3033,#3034,#3035,#3036,#3037,#3038,#3039,#3040,#3041,#3042,
#3043,#3044,#3045,#3046,#3047,#3048,#3049,#3050,#3051,#3052,#3053,#3054,
#3055,#3056,#3057,#3058,#3059,#3060,#3061,#3062,#3063,#3064,#3065,#3066,
#3067,#3068,#3069,#3070,#3071,#3072,#3073,#3074,#3075,#3076,#3077,#3078,
#3079,#3080,#3081,#3082,#3083,#3084,#3085,#3086,#3087,#3088,#3089,#3090,
#3091,#3092,#3093,#3094,#3095,#3096,#3097,#3098,#3099,#3100,#3101,#3102,
#3103,#3104,#3105,#3106,#3107,#3108,#3109,#3110,#3111,#3112,#3113,#3114,
#3115,#3116,#3117,#3118,#3119,#3120,#3121,#3122,#3123,#3124,#3125,#3126,
#3127,#3128,#3129,#3130,#3131,#3132,#3133,#3134,#3135,#3136,#3137,#3138,
#3139,#3140,#3141,#3142,#3143,#3144,#3145,#3146,#3147,#3148,#3149,#3150,
#3151,#3152,#3153,#3154,#3155,#3156,#3157,#3158,#3159,#3160,#3161,#3162,
#3163,#3164,#3165,#3166,#3167,#3168,#3169,#3170,#3171,#3172,#3173,#3174,
#3175,#3176,#3177,#3178,#3179,#3180,#3181,#3182,#3183,#3184,#3185,#3186,
#3187,#3188,#3189,#3190,#3191,#3192,#3193,#3194,#3195,#3196,#3197,#3198,
#3199,#3200,#3201,#3202,#3203,#3204,#3205,#3206,#3207,#3208,#3209,#3210,
#3211,#3212,#3213,#3214,#3215,#3216,#3217,#3218,#3219,#3220,#3221,#3222,
#3223,#3224,#3225,#3226,#3227,#3228,#3229,#3230,#3231,#3232,#3233,#3234,
#3235,#3236,#3237,#3238,#3239,#3240,#3241,#3242,#3243,#3244,#3245,#3246,
#3247,#3248),.UNSPECIFIED.,.F.,.F.,(4,1,1,1,1,1,1,1,1,1,1,1,1,1,1,1,1,1,
1,1,1,1,1,1,1,1,1,1,1,1,1,1,1,1,1,1,1,1,1,1,1,1,1,1,1,1,1,1,1,1,1,1,1,1,
1,1,1,1,1,1,1,1,1,1,1,1,1,1,1,1,1,1,1,1,1,1,1,1,1,1,1,1,1,1,1,1,1,1,1,1,
1,1,1,1,1,1,1,1,1,1,1,1,1,1,1,1,1,1,1,1,1,1,1,1,1,1,1,1,1,1,1,1,1,1,1,1,
1,1,1,1,1,1,1,1,1,1,1,1,1,1,1,1,1,1,1,1,1,1,1,1,1,1,1,1,1,1,1,1,1,1,1,1,
1,1,1,1,1,1,1,1,1,1,1,1,1,1,1,1,1,1,1,1,1,1,1,1,1,1,1,1,1,1,1,1,1,1,1,1,
1,1,1,1,1,1,1,1,1,1,1,1,1,1,1,1,1,1,1,1,1,1,1,1,1,1,1,1,1,1,1,1,1,1,1,1,
1,1,1,1,1,1,1,1,1,1,1,1,1,1,1,1,1,1,1,1,1,1,1,4),(0.,2.38245729200542,3.57414362987012,
4.76260100467874,7.13566214604912,9.50486281200516,11.868928832239,14.2282367671153,
16.5827023057934,18.9323341421039,21.277134201622,23.6171021887677,25.9522397315031,
28.2825472654474,30.6080239148339,32.9286677976576,35.2444786213747,37.5554572801613,
39.8616050054091,42.1629226439068,44.4594099544073,46.751065191794,49.0378872990536,
51.3198768336143,53.5970349675632,55.8693627718404,58.1368605152281,60.3995270052688,
62.6573605546397,64.9103612257518,67.1585300252716,69.4018681348511,71.6403762148608,
73.8740537200632,76.1028988043993,78.3269108464278,80.5460905839764,82.7604392002953,
84.9699576325252,87.1746458921129,89.3745025057265,91.569526111547,93.7597170583455,
95.9450764256591,98.125605316385,100.301304181937,102.472172162778,104.638207470078,
106.799409880282,108.955780267707,111.107319793796,113.254029237018,115.3959083347,
117.532955410509,119.66516950649,121.792551191154,123.915101581088,126.032821672705,
128.145711688826,130.25377046685,132.356996425579,134.455389676882,136.548951192886,
138.637682082648,140.72158294347,142.800653224162,144.874891164706,146.94429622969,
149.008869150976,151.068611048765,153.123522787642,155.173604344579,157.218854295779,
159.259271385602,161.29485599272,163.325609150779,165.351531888248,167.372624601161,
169.388886441204,171.400315718734,173.406912279035,175.408676975301,177.405610900292,
179.397714763808,181.384988282099,183.367429847722,185.345038601934,187.317815124491,
189.285760476652,191.248875580489,193.207160613039,195.160614441731,197.109235591651,
199.053024224294,200.991981277427,202.926107787706,204.855404289564,206.779870226042,
208.699503923347,210.614304932263,212.524273978882,214.429412120556,216.329720149529,
218.225198008502,220.115844323414,222.001657944987,223.882639281992,225.758789322398,
227.630109020475,229.4965987171,231.3582575754,233.215084005127,235.067077920604,
236.914240154133,238.75657173003,240.594073289668,242.42674452846,244.254583908084,
246.077590669224,247.895765403118,249.709109115952,251.517622655718,253.321306153933,
255.120158508307,256.914178350452,258.703365891728,260.487722035817,262.267247747252,
264.041943497882,265.811808725263,267.576841842083,269.337042485588,271.092411376377,
272.842949509258,274.588657604438,276.329535570657,278.065582083882,279.796796101477,
281.52317806261,283.244728909889,284.961449523716,286.673340190148,288.380400084083,
290.082627714969,291.780023066484,293.472586950373,295.160320322865,296.843223757271,
298.521296928527,300.194538367774,301.862947415455,303.52652467465,305.185271096851,
306.839187456362,308.488273839576,310.132529174869,311.771952200738,313.406543178792,
315.036302979025,316.661232494277,318.281332134243,319.896601331416,321.507038585374,
323.112643620224,324.713417151504,326.309360111931,327.900473150148,329.486756141401,
331.068207812136,332.644827226795,334.216614855397,335.783571595684,337.345698254695,
338.902995064183,340.455461211314,342.003095305723,343.545897400926,345.083868288635,
346.61700885754,348.145319613451,349.668800211388,351.187449252492,352.701266177494,
354.210251601871,355.714406423013,357.213731342151,358.708226401169,360.197890559713,
361.682722663742,363.16272302571,364.637892482564,366.108231856115,367.573741494579,
369.034420826059,370.490268437672,371.941284141026,373.387468647284,374.828822827795,
376.265347260378,377.697041787529,379.123905186902,380.545936630721,381.963136620591,
383.375506010169,384.783045533945,386.185755370186,387.583634719144,388.97668229142,
390.364898211163,391.748283250902,393.126838232671,394.500563595686,395.869458975951,
397.233523045497,398.592755346206,399.947156506868,401.296727371737,402.641468569965,
403.981380099931,405.316460953543,406.64671008519,407.972127859158,409.292715080402,
410.608472500791,411.919400408179,413.225498227392,414.526764634166,415.823199528695,
417.11480361891,418.401577715991,419.683522328164,420.960637266417,422.232921360834,
423.50037389262,424.762995396215,426.020786682502,427.273748414782,428.52188071922,
429.765182810533,431.003653501635,432.237292988675,433.466102026433,434.690081371794,
435.909231398916,437.123551726338,438.333041098503,439.537699159955,440.737526554376,
441.932524074545,443.122692279243,444.308031125082,445.488539637957,446.664216882383,
447.835063276216,449.001079594246,450.162266520309,451.318624234112,452.47015230783),
 .UNSPECIFIED.);
#247=B_SPLINE_CURVE_WITH_KNOTS('',1,(#3249,#3250),.UNSPECIFIED.,.F.,.F.,
(2,2),(1.38179838290946,2.38179838290946),.UNSPECIFIED.);
#248=B_SPLINE_CURVE_WITH_KNOTS('',1,(#3251,#3252),.UNSPECIFIED.,.F.,.F.,
(2,2),(2.38179838290946,2.54179838290946),.UNSPECIFIED.);
#249=B_SPLINE_CURVE_WITH_KNOTS('',3,(#3253,#3254,#3255,#3256,#3257,#3258,
#3259,#3260,#3261,#3262,#3263,#3264,#3265,#3266,#3267),.UNSPECIFIED.,.F.,
 .F.,(4,1,1,1,1,1,1,1,1,1,1,1,4),(452.47015230783,453.940290359542,454.72835395173,
455.533200308334,456.338046664938,457.126110257126,458.596248308839,460.066386360552,
460.85444995274,461.659296309344,462.464142665948,463.252206258136,464.722344309848),
 .UNSPECIFIED.);
#250=B_SPLINE_CURVE_WITH_KNOTS('',3,(#3268,#3269,#3270,#3271,#3272,#3273,
#3274,#3275,#3276,#3277,#3278,#3279,#3280,#3281,#3282),.UNSPECIFIED.,.F.,
 .F.,(4,1,1,1,1,1,1,1,1,1,1,1,4),(452.47015230783,453.940290359542,454.72835395173,
455.533200308334,456.338046664938,457.126110257126,458.596248308839,460.066386360552,
460.85444995274,461.659296309344,462.464142665948,463.252206258136,464.722344309848),
 .UNSPECIFIED.);
#251=B_SPLINE_CURVE_WITH_KNOTS('',3,(#3283,#3284,#3285,#3286,#3287,#3288,
#3289,#3290,#3291,#3292,#3293,#3294,#3295,#3296,#3297),.UNSPECIFIED.,.F.,
 .F.,(4,1,1,1,1,1,1,1,1,1,1,1,4),(452.47015230783,453.940290359542,454.72835395173,
455.533200308334,456.338046664938,457.126110257126,458.596248308839,460.066386360552,
460.85444995274,461.659296309344,462.464142665948,463.252206258136,464.722344309848),
 .UNSPECIFIED.);
#252=B_SPLINE_CURVE_WITH_KNOTS('',1,(#3298,#3299),.UNSPECIFIED.,.F.,.F.,
(2,2),(-2.13179838290946,-1.38179838290945),.UNSPECIFIED.);
#253=B_SPLINE_CURVE_WITH_KNOTS('',3,(#3300,#3301,#3302,#3303,#3304,#3305,
#3306,#3307,#3308,#3309,#3310,#3311,#3312,#3313,#3314,#3315,#3316,#3317,
#3318,#3319,#3320,#3321,#3322,#3323,#3324,#3325,#3326,#3327,#3328,#3329,
#3330,#3331,#3332,#3333,#3334,#3335,#3336,#3337,#3338,#3339,#3340,#3341,
#3342,#3343,#3344,#3345,#3346,#3347,#3348,#3349,#3350,#3351,#3352,#3353,
#3354,#3355,#3356,#3357,#3358,#3359,#3360,#3361,#3362,#3363,#3364,#3365,
#3366,#3367,#3368,#3369,#3370,#3371,#3372,#3373,#3374,#3375,#3376,#3377,
#3378,#3379,#3380,#3381,#3382,#3383,#3384,#3385,#3386,#3387,#3388,#3389,
#3390,#3391,#3392,#3393,#3394,#3395,#3396,#3397,#3398,#3399,#3400,#3401,
#3402,#3403,#3404,#3405,#3406,#3407,#3408,#3409,#3410,#3411,#3412,#3413,
#3414,#3415,#3416,#3417,#3418,#3419,#3420,#3421,#3422,#3423,#3424,#3425,
#3426,#3427,#3428,#3429,#3430,#3431,#3432,#3433,#3434,#3435,#3436,#3437,
#3438,#3439,#3440,#3441,#3442,#3443,#3444,#3445,#3446,#3447,#3448,#3449,
#3450,#3451,#3452,#3453,#3454,#3455,#3456,#3457,#3458,#3459,#3460,#3461,
#3462,#3463,#3464,#3465,#3466,#3467,#3468,#3469,#3470,#3471,#3472,#3473,
#3474,#3475,#3476,#3477,#3478,#3479,#3480,#3481,#3482,#3483,#3484,#3485,
#3486,#3487,#3488,#3489,#3490,#3491,#3492,#3493,#3494,#3495,#3496,#3497,
#3498,#3499,#3500,#3501,#3502,#3503,#3504,#3505,#3506,#3507,#3508,#3509,
#3510,#3511,#3512,#3513,#3514,#3515,#3516,#3517,#3518,#3519,#3520,#3521,
#3522,#3523,#3524,#3525,#3526,#3527,#3528,#3529,#3530,#3531,#3532,#3533,
#3534,#3535,#3536,#3537,#3538,#3539,#3540,#3541,#3542,#3543,#3544,#3545,
#3546,#3547,#3548,#3549,#3550,#3551,#3552,#3553,#3554,#3555,#3556,#3557,
#3558,#3559),.UNSPECIFIED.,.F.,.F.,(4,1,1,1,1,1,1,1,1,1,1,1,1,1,1,1,1,1,
1,1,1,1,1,1,1,1,1,1,1,1,1,1,1,1,1,1,1,1,1,1,1,1,1,1,1,1,1,1,1,1,1,1,1,1,
1,1,1,1,1,1,1,1,1,1,1,1,1,1,1,1,1,1,1,1,1,1,1,1,1,1,1,1,1,1,1,1,1,1,1,1,
1,1,1,1,1,1,1,1,1,1,1,1,1,1,1,1,1,1,1,1,1,1,1,1,1,1,1,1,1,1,1,1,1,1,1,1,
1,1,1,1,1,1,1,1,1,1,1,1,1,1,1,1,1,1,1,1,1,1,1,1,1,1,1,1,1,1,1,1,1,1,1,1,
1,1,1,1,1,1,1,1,1,1,1,1,1,1,1,1,1,1,1,1,1,1,1,1,1,1,1,1,1,1,1,1,1,1,1,1,
1,1,1,1,1,1,1,1,1,1,1,1,1,1,1,1,1,1,1,1,1,1,1,1,1,1,1,1,1,1,1,1,1,1,1,1,
1,1,1,1,1,1,1,1,1,1,1,1,1,1,1,1,1,1,1,1,1,1,1,4),(0.979785914837176,2.38245729200542,
3.57414362987012,4.76260100467874,7.13566214604912,9.50486281200516,11.868928832239,
14.2282367671153,16.5827023057934,18.9323341421039,21.277134201622,23.6171021887677,
25.9522397315031,28.2825472654474,30.6080239148339,32.9286677976576,35.2444786213747,
37.5554572801613,39.8616050054091,42.1629226439068,44.4594099544073,46.751065191794,
49.0378872990536,51.3198768336143,53.5970349675632,55.8693627718404,58.1368605152281,
60.3995270052688,62.6573605546397,64.9103612257518,67.1585300252716,69.4018681348511,
71.6403762148608,73.8740537200632,76.1028988043993,78.3269108464278,80.5460905839764,
82.7604392002953,84.9699576325252,87.1746458921129,89.3745025057265,91.569526111547,
93.7597170583455,95.9450764256591,98.125605316385,100.301304181937,102.472172162778,
104.638207470078,106.799409880282,108.955780267707,111.107319793796,113.254029237018,
115.3959083347,117.532955410509,119.66516950649,121.792551191154,123.915101581088,
126.032821672705,128.145711688826,130.25377046685,132.356996425579,134.455389676882,
136.548951192886,138.637682082648,140.72158294347,142.800653224162,144.874891164706,
146.94429622969,149.008869150976,151.068611048765,153.123522787642,155.173604344579,
157.218854295779,159.259271385602,161.29485599272,163.325609150779,165.351531888248,
167.372624601161,169.388886441204,171.400315718734,173.406912279035,175.408676975301,
177.405610900292,179.397714763808,181.384988282099,183.367429847722,185.345038601934,
187.317815124491,189.285760476652,191.248875580489,193.207160613039,195.160614441731,
197.109235591651,199.053024224294,200.991981277427,202.926107787706,204.855404289564,
206.779870226042,208.699503923347,210.614304932263,212.524273978882,214.429412120556,
216.329720149529,218.225198008502,220.115844323414,222.001657944987,223.882639281992,
225.758789322398,227.630109020475,229.4965987171,231.3582575754,233.215084005127,
235.067077920604,236.914240154133,238.75657173003,240.594073289668,242.42674452846,
244.254583908084,246.077590669224,247.895765403118,249.709109115952,251.517622655718,
253.321306153933,255.120158508307,256.914178350452,258.703365891728,260.487722035817,
262.267247747252,264.041943497882,265.811808725263,267.576841842083,269.337042485588,
271.092411376377,272.842949509258,274.588657604438,276.329535570657,278.065582083882,
279.796796101477,281.52317806261,283.244728909889,284.961449523716,286.673340190148,
288.380400084083,290.082627714969,291.780023066484,293.472586950373,295.160320322865,
296.843223757271,298.521296928527,300.194538367774,301.862947415455,303.52652467465,
305.185271096851,306.839187456362,308.488273839576,310.132529174869,311.771952200738,
313.406543178792,315.036302979025,316.661232494277,318.281332134243,319.896601331416,
321.507038585374,323.112643620224,324.713417151504,326.309360111931,327.900473150148,
329.486756141401,331.068207812136,332.644827226795,334.216614855397,335.783571595684,
337.345698254695,338.902995064183,340.455461211314,342.003095305723,343.545897400926,
345.083868288635,346.61700885754,348.145319613451,349.668800211388,351.187449252492,
352.701266177494,354.210251601871,355.714406423013,357.213731342151,358.708226401169,
360.197890559713,361.682722663742,363.16272302571,364.637892482564,366.108231856115,
367.573741494579,369.034420826059,370.490268437672,371.941284141026,373.387468647284,
374.828822827795,376.265347260378,377.697041787529,379.123905186902,380.545936630721,
381.963136620591,383.375506010169,384.783045533945,386.185755370186,387.583634719144,
388.97668229142,390.364898211163,391.748283250902,393.126838232671,394.500563595686,
395.869458975951,397.233523045497,398.592755346206,399.947156506868,401.296727371737,
402.641468569965,403.981380099931,405.316460953543,406.64671008519,407.972127859158,
409.292715080402,410.608472500791,411.919400408179,413.225498227392,414.526764634166,
415.823199528695,417.11480361891,418.401577715991,419.683522328164,420.960637266417,
422.232921360834,423.50037389262,424.762995396215,426.020786682502,427.273748414782,
428.52188071922,429.765182810533,431.003653501635,432.237292988675,433.466102026433,
434.690081371794,435.909231398916,437.123551726338,438.333041098503,439.537699159955,
440.737526554376,441.932524074545,443.122692279243,444.308031125082,445.488539637957,
446.664216882383,447.835063276216,449.001079594246,450.162266520309,451.318624234112,
452.47015230783),.UNSPECIFIED.);
#254=B_SPLINE_CURVE_WITH_KNOTS('',3,(#3560,#3561,#3562,#3563,#3564,#3565,
#3566,#3567,#3568,#3569,#3570,#3571,#3572,#3573,#3574,#3575,#3576,#3577,
#3578,#3579,#3580,#3581,#3582,#3583,#3584,#3585,#3586,#3587,#3588,#3589,
#3590,#3591,#3592,#3593,#3594,#3595,#3596,#3597,#3598,#3599,#3600,#3601,
#3602,#3603,#3604,#3605,#3606,#3607,#3608,#3609,#3610,#3611,#3612,#3613,
#3614,#3615,#3616,#3617,#3618,#3619,#3620,#3621,#3622,#3623,#3624,#3625,
#3626,#3627,#3628,#3629,#3630,#3631,#3632,#3633,#3634,#3635,#3636,#3637,
#3638,#3639,#3640,#3641,#3642,#3643,#3644,#3645,#3646,#3647,#3648,#3649,
#3650,#3651,#3652,#3653,#3654,#3655,#3656,#3657,#3658,#3659,#3660,#3661,
#3662,#3663,#3664,#3665,#3666,#3667,#3668,#3669,#3670,#3671,#3672,#3673,
#3674,#3675,#3676,#3677,#3678,#3679,#3680,#3681,#3682,#3683,#3684,#3685,
#3686,#3687,#3688,#3689,#3690,#3691,#3692,#3693,#3694,#3695,#3696,#3697,
#3698,#3699,#3700,#3701,#3702,#3703,#3704,#3705,#3706,#3707,#3708,#3709,
#3710,#3711,#3712,#3713,#3714,#3715,#3716,#3717,#3718,#3719,#3720,#3721,
#3722,#3723,#3724,#3725,#3726,#3727,#3728,#3729,#3730,#3731,#3732,#3733,
#3734,#3735,#3736,#3737,#3738,#3739,#3740,#3741,#3742,#3743,#3744,#3745,
#3746,#3747,#3748,#3749,#3750,#3751,#3752,#3753,#3754,#3755,#3756,#3757,
#3758,#3759,#3760,#3761,#3762,#3763,#3764,#3765,#3766,#3767,#3768,#3769,
#3770,#3771,#3772,#3773,#3774,#3775,#3776,#3777,#3778,#3779,#3780,#3781,
#3782,#3783,#3784,#3785,#3786,#3787,#3788,#3789,#3790,#3791,#3792,#3793,
#3794,#3795,#3796,#3797,#3798,#3799,#3800,#3801,#3802,#3803,#3804,#3805,
#3806,#3807,#3808,#3809,#3810,#3811,#3812,#3813,#3814,#3815,#3816,#3817,
#3818,#3819),.UNSPECIFIED.,.F.,.F.,(4,1,1,1,1,1,1,1,1,1,1,1,1,1,1,1,1,1,
1,1,1,1,1,1,1,1,1,1,1,1,1,1,1,1,1,1,1,1,1,1,1,1,1,1,1,1,1,1,1,1,1,1,1,1,
1,1,1,1,1,1,1,1,1,1,1,1,1,1,1,1,1,1,1,1,1,1,1,1,1,1,1,1,1,1,1,1,1,1,1,1,
1,1,1,1,1,1,1,1,1,1,1,1,1,1,1,1,1,1,1,1,1,1,1,1,1,1,1,1,1,1,1,1,1,1,1,1,
1,1,1,1,1,1,1,1,1,1,1,1,1,1,1,1,1,1,1,1,1,1,1,1,1,1,1,1,1,1,1,1,1,1,1,1,
1,1,1,1,1,1,1,1,1,1,1,1,1,1,1,1,1,1,1,1,1,1,1,1,1,1,1,1,1,1,1,1,1,1,1,1,
1,1,1,1,1,1,1,1,1,1,1,1,1,1,1,1,1,1,1,1,1,1,1,1,1,1,1,1,1,1,1,1,1,1,1,1,
1,1,1,1,1,1,1,1,1,1,1,1,1,1,1,1,1,1,1,1,1,1,1,4),(0.979785914866838,2.38245729200542,
3.57414362987012,4.76260100467874,7.13566214604912,9.50486281200516,11.868928832239,
14.2282367671153,16.5827023057934,18.9323341421039,21.277134201622,23.6171021887677,
25.9522397315031,28.2825472654474,30.6080239148339,32.9286677976576,35.2444786213747,
37.5554572801613,39.8616050054091,42.1629226439068,44.4594099544073,46.751065191794,
49.0378872990536,51.3198768336143,53.5970349675632,55.8693627718404,58.1368605152281,
60.3995270052688,62.6573605546397,64.9103612257518,67.1585300252716,69.4018681348511,
71.6403762148608,73.8740537200632,76.1028988043993,78.3269108464278,80.5460905839764,
82.7604392002953,84.9699576325252,87.1746458921129,89.3745025057265,91.569526111547,
93.7597170583455,95.9450764256591,98.125605316385,100.301304181937,102.472172162778,
104.638207470078,106.799409880282,108.955780267707,111.107319793796,113.254029237018,
115.3959083347,117.532955410509,119.66516950649,121.792551191154,123.915101581088,
126.032821672705,128.145711688826,130.25377046685,132.356996425579,134.455389676882,
136.548951192886,138.637682082648,140.72158294347,142.800653224162,144.874891164706,
146.94429622969,149.008869150976,151.068611048765,153.123522787642,155.173604344579,
157.218854295779,159.259271385602,161.29485599272,163.325609150779,165.351531888248,
167.372624601161,169.388886441204,171.400315718734,173.406912279035,175.408676975301,
177.405610900292,179.397714763808,181.384988282099,183.367429847722,185.345038601934,
187.317815124491,189.285760476652,191.248875580489,193.207160613039,195.160614441731,
197.109235591651,199.053024224294,200.991981277427,202.926107787706,204.855404289564,
206.779870226042,208.699503923347,210.614304932263,212.524273978882,214.429412120556,
216.329720149529,218.225198008502,220.115844323414,222.001657944987,223.882639281992,
225.758789322398,227.630109020475,229.4965987171,231.3582575754,233.215084005127,
235.067077920604,236.914240154133,238.75657173003,240.594073289668,242.42674452846,
244.254583908084,246.077590669224,247.895765403118,249.709109115952,251.517622655718,
253.321306153933,255.120158508307,256.914178350452,258.703365891728,260.487722035817,
262.267247747252,264.041943497882,265.811808725263,267.576841842083,269.337042485588,
271.092411376377,272.842949509258,274.588657604438,276.329535570657,278.065582083882,
279.796796101477,281.52317806261,283.244728909889,284.961449523716,286.673340190148,
288.380400084083,290.082627714969,291.780023066484,293.472586950373,295.160320322865,
296.843223757271,298.521296928527,300.194538367774,301.862947415455,303.52652467465,
305.185271096851,306.839187456362,308.488273839576,310.132529174869,311.771952200738,
313.406543178792,315.036302979025,316.661232494277,318.281332134243,319.896601331416,
321.507038585374,323.112643620224,324.713417151504,326.309360111931,327.900473150148,
329.486756141401,331.068207812136,332.644827226795,334.216614855397,335.783571595684,
337.345698254695,338.902995064183,340.455461211314,342.003095305723,343.545897400926,
345.083868288635,346.61700885754,348.145319613451,349.668800211388,351.187449252492,
352.701266177494,354.210251601871,355.714406423013,357.213731342151,358.708226401169,
360.197890559713,361.682722663742,363.16272302571,364.637892482564,366.108231856115,
367.573741494579,369.034420826059,370.490268437672,371.941284141026,373.387468647284,
374.828822827795,376.265347260378,377.697041787529,379.123905186902,380.545936630721,
381.963136620591,383.375506010169,384.783045533945,386.185755370186,387.583634719144,
388.97668229142,390.364898211163,391.748283250902,393.126838232671,394.500563595686,
395.869458975951,397.233523045497,398.592755346206,399.947156506868,401.296727371737,
402.641468569965,403.981380099931,405.316460953543,406.64671008519,407.972127859158,
409.292715080402,410.608472500791,411.919400408179,413.225498227392,414.526764634166,
415.823199528695,417.11480361891,418.401577715991,419.683522328164,420.960637266417,
422.232921360834,423.50037389262,424.762995396215,426.020786682502,427.273748414782,
428.52188071922,429.765182810533,431.003653501635,432.237292988675,433.466102026433,
434.690081371794,435.909231398916,437.123551726338,438.333041098503,439.537699159955,
440.737526554376,441.932524074545,443.122692279243,444.308031125082,445.488539637957,
446.664216882383,447.835063276216,449.001079594246,450.162266520309,451.318624234112,
452.47015230783),.UNSPECIFIED.);
#255=B_SPLINE_CURVE_WITH_KNOTS('',1,(#3820,#3821),.UNSPECIFIED.,.F.,.F.,
(2,2),(1.72134878718209,1.89634878718209),.UNSPECIFIED.);
#256=B_SPLINE_CURVE_WITH_KNOTS('',1,(#3822,#3823),.UNSPECIFIED.,.F.,.F.,
(2,2),(2.86769757436418,3.61769757436418),.UNSPECIFIED.);
#257=B_SPLINE_CURVE_WITH_KNOTS('',1,(#3824,#3825),.UNSPECIFIED.,.F.,.F.,
(2,2),(2.64769757436418,2.86769757436418),.UNSPECIFIED.);
#258=B_SPLINE_CURVE_WITH_KNOTS('',1,(#3826,#3827),.UNSPECIFIED.,.F.,.F.,
(2,2),(0.,0.751348787182092),.UNSPECIFIED.);
#259=B_SPLINE_CURVE_WITH_KNOTS('',3,(#3828,#3829,#3830,#3831),
 .UNSPECIFIED.,.F.,.F.,(4,4),(0.,6.),.UNSPECIFIED.);
#260=B_SPLINE_CURVE_WITH_KNOTS('',3,(#3832,#3833,#3834,#3835),
 .UNSPECIFIED.,.F.,.F.,(4,4),(0.,6.),.UNSPECIFIED.);
#261=B_SPLINE_CURVE_WITH_KNOTS('',3,(#3836,#3837,#3838,#3839),
 .UNSPECIFIED.,.F.,.F.,(4,4),(0.302285527341006,3.81608438061844),
 .UNSPECIFIED.);
#262=B_SPLINE_CURVE_WITH_KNOTS('',3,(#3840,#3841,#3842,#3843),
 .UNSPECIFIED.,.F.,.F.,(4,4),(0.302285527341006,3.81608438061844),
 .UNSPECIFIED.);
#263=B_SPLINE_CURVE_WITH_KNOTS('',3,(#3844,#3845,#3846,#3847),
 .UNSPECIFIED.,.F.,.F.,(4,4),(0.350000000000023,6.),.UNSPECIFIED.);
#264=B_SPLINE_CURVE_WITH_KNOTS('',3,(#3848,#3849,#3850,#3851),
 .UNSPECIFIED.,.F.,.F.,(4,4),(0.350000000000023,6.),.UNSPECIFIED.);
#265=VERTEX_POINT('',#2628);
#266=VERTEX_POINT('',#2629);
#267=VERTEX_POINT('',#2630);
#268=VERTEX_POINT('',#2631);
#269=VERTEX_POINT('',#2632);
#270=VERTEX_POINT('',#2633);
#271=VERTEX_POINT('',#2634);
#272=VERTEX_POINT('',#2635);
#273=VERTEX_POINT('',#2636);
#274=VERTEX_POINT('',#2637);
#275=VERTEX_POINT('',#2638);
#276=VERTEX_POINT('',#2639);
#277=VERTEX_POINT('',#2640);
#278=VERTEX_POINT('',#2641);
#279=VERTEX_POINT('',#2642);
#280=VERTEX_POINT('',#2643);
#281=VERTEX_POINT('',#2644);
#282=VERTEX_POINT('',#2645);
#283=VERTEX_POINT('',#2646);
#284=VERTEX_POINT('',#2647);
#285=VERTEX_POINT('',#2648);
#286=VERTEX_POINT('',#2649);
#287=VERTEX_POINT('',#2650);
#288=VERTEX_POINT('',#2651);
#289=VERTEX_POINT('',#2652);
#290=VERTEX_POINT('',#2653);
#291=B_SPLINE_SURFACE_WITH_KNOTS('',1,3,((#362,#363,#364,#365),(#366,#367,
#368,#369)),.UNSPECIFIED.,.F.,.F.,.F.,(2,2),(4,4),(1.33500203574655,2.33511656492149),
(0.,3.81608438061844),.UNSPECIFIED.);
#292=B_SPLINE_SURFACE_WITH_KNOTS('',1,3,((#370,#371,#372,#373),(#374,#375,
#376,#377)),.UNSPECIFIED.,.F.,.F.,.F.,(2,2),(4,4),(0.,0.160000000000911),
(0.,3.81608438061844),.UNSPECIFIED.);
#293=B_SPLINE_SURFACE_WITH_KNOTS('',1,3,((#378,#379,#380,#381),(#382,#383,
#384,#385)),.UNSPECIFIED.,.F.,.F.,.F.,(2,2),(4,4),(0.160000000000911,1.16000203574655),
(0.,3.81608438061844),.UNSPECIFIED.);
#294=B_SPLINE_SURFACE_WITH_KNOTS('',1,3,((#387,#388,#389,#390,#391,#392,
#393,#394,#395,#396,#397,#398,#399,#400,#401,#402,#403,#404,#405,#406,#407,
#408,#409,#410,#411,#412,#413,#414,#415,#416,#417,#418,#419,#420,#421,#422,
#423,#424,#425,#426,#427,#428,#429,#430,#431,#432,#433,#434,#435,#436,#437,
#438,#439,#440,#441,#442,#443,#444,#445,#446,#447,#448,#449,#450,#451,#452,
#453,#454,#455,#456,#457,#458,#459,#460,#461,#462,#463,#464,#465,#466,#467,
#468,#469,#470,#471,#472,#473,#474,#475,#476,#477,#478,#479,#480,#481,#482,
#483,#484,#485,#486,#487,#488,#489,#490,#491,#492,#493,#494,#495,#496,#497,
#498,#499,#500,#501,#502,#503,#504,#505,#506,#507,#508,#509,#510,#511,#512,
#513,#514,#515,#516,#517,#518,#519,#520,#521,#522,#523,#524,#525,#526,#527,
#528,#529,#530,#531,#532,#533,#534,#535,#536,#537,#538,#539,#540,#541,#542,
#543,#544,#545,#546,#547,#548,#549,#550,#551,#552,#553,#554,#555,#556,#557,
#558,#559,#560,#561,#562,#563,#564,#565,#566,#567,#568,#569,#570,#571,#572,
#573,#574,#575,#576,#577,#578,#579,#580,#581,#582,#583,#584,#585,#586,#587,
#588,#589,#590,#591,#592,#593,#594,#595,#596,#597,#598,#599,#600,#601,#602,
#603,#604,#605,#606,#607,#608,#609,#610,#611,#612,#613,#614,#615,#616,#617,
#618,#619,#620,#621,#622,#623,#624,#625,#626,#627,#628,#629,#630,#631,#632,
#633,#634,#635,#636,#637,#638,#639,#640,#641,#642,#643,#644,#645,#646),
(#647,#648,#649,#650,#651,#652,#653,#654,#655,#656,#657,#658,#659,#660,
#661,#662,#663,#664,#665,#666,#667,#668,#669,#670,#671,#672,#673,#674,#675,
#676,#677,#678,#679,#680,#681,#682,#683,#684,#685,#686,#687,#688,#689,#690,
#691,#692,#693,#694,#695,#696,#697,#698,#699,#700,#701,#702,#703,#704,#705,
#706,#707,#708,#709,#710,#711,#712,#713,#714,#715,#716,#717,#718,#719,#720,
#721,#722,#723,#724,#725,#726,#727,#728,#729,#730,#731,#732,#733,#734,#735,
#736,#737,#738,#739,#740,#741,#742,#743,#744,#745,#746,#747,#748,#749,#750,
#751,#752,#753,#754,#755,#756,#757,#758,#759,#760,#761,#762,#763,#764,#765,
#766,#767,#768,#769,#770,#771,#772,#773,#774,#775,#776,#777,#778,#779,#780,
#781,#782,#783,#784,#785,#786,#787,#788,#789,#790,#791,#792,#793,#794,#795,
#796,#797,#798,#799,#800,#801,#802,#803,#804,#805,#806,#807,#808,#809,#810,
#811,#812,#813,#814,#815,#816,#817,#818,#819,#820,#821,#822,#823,#824,#825,
#826,#827,#828,#829,#830,#831,#832,#833,#834,#835,#836,#837,#838,#839,#840,
#841,#842,#843,#844,#845,#846,#847,#848,#849,#850,#851,#852,#853,#854,#855,
#856,#857,#858,#859,#860,#861,#862,#863,#864,#865,#866,#867,#868,#869,#870,
#871,#872,#873,#874,#875,#876,#877,#878,#879,#880,#881,#882,#883,#884,#885,
#886,#887,#888,#889,#890,#891,#892,#893,#894,#895,#896,#897,#898,#899,#900,
#901,#902,#903,#904,#905,#906)),.UNSPECIFIED.,.F.,.F.,.F.,(2,2),(4,1,1,
1,1,1,1,1,1,1,1,1,1,1,1,1,1,1,1,1,1,1,1,1,1,1,1,1,1,1,1,1,1,1,1,1,1,1,1,
1,1,1,1,1,1,1,1,1,1,1,1,1,1,1,1,1,1,1,1,1,1,1,1,1,1,1,1,1,1,1,1,1,1,1,1,
1,1,1,1,1,1,1,1,1,1,1,1,1,1,1,1,1,1,1,1,1,1,1,1,1,1,1,1,1,1,1,1,1,1,1,1,
1,1,1,1,1,1,1,1,1,1,1,1,1,1,1,1,1,1,1,1,1,1,1,1,1,1,1,1,1,1,1,1,1,1,1,1,
1,1,1,1,1,1,1,1,1,1,1,1,1,1,1,1,1,1,1,1,1,1,1,1,1,1,1,1,1,1,1,1,1,1,1,1,
1,1,1,1,1,1,1,1,1,1,1,1,1,1,1,1,1,1,1,1,1,1,1,1,1,1,1,1,1,1,1,1,1,1,1,1,
1,1,1,1,1,1,1,1,1,1,1,1,1,1,1,1,1,1,1,1,1,1,1,1,1,1,1,1,1,1,1,1,1,1,1,1,
1,1,4),(2.38179838290946,2.54179838290946),(0.,2.38245729200542,3.57414362987012,
4.76260100467874,7.13566214604912,9.50486281200516,11.868928832239,14.2282367671153,
16.5827023057934,18.9323341421039,21.277134201622,23.6171021887677,25.9522397315031,
28.2825472654474,30.6080239148339,32.9286677976576,35.2444786213747,37.5554572801613,
39.8616050054091,42.1629226439068,44.4594099544073,46.751065191794,49.0378872990536,
51.3198768336143,53.5970349675632,55.8693627718404,58.1368605152281,60.3995270052688,
62.6573605546397,64.9103612257518,67.1585300252716,69.4018681348511,71.6403762148608,
73.8740537200632,76.1028988043993,78.3269108464278,80.5460905839764,82.7604392002953,
84.9699576325252,87.1746458921129,89.3745025057265,91.569526111547,93.7597170583455,
95.9450764256591,98.125605316385,100.301304181937,102.472172162778,104.638207470078,
106.799409880282,108.955780267707,111.107319793796,113.254029237018,115.3959083347,
117.532955410509,119.66516950649,121.792551191154,123.915101581088,126.032821672705,
128.145711688826,130.25377046685,132.356996425579,134.455389676882,136.548951192886,
138.637682082648,140.72158294347,142.800653224162,144.874891164706,146.94429622969,
149.008869150976,151.068611048765,153.123522787642,155.173604344579,157.218854295779,
159.259271385602,161.29485599272,163.325609150779,165.351531888248,167.372624601161,
169.388886441204,171.400315718734,173.406912279035,175.408676975301,177.405610900292,
179.397714763808,181.384988282099,183.367429847722,185.345038601934,187.317815124491,
189.285760476652,191.248875580489,193.207160613039,195.160614441731,197.109235591651,
199.053024224294,200.991981277427,202.926107787706,204.855404289564,206.779870226042,
208.699503923347,210.614304932263,212.524273978882,214.429412120556,216.329720149529,
218.225198008502,220.115844323414,222.001657944987,223.882639281992,225.758789322398,
227.630109020475,229.4965987171,231.3582575754,233.215084005127,235.067077920604,
236.914240154133,238.75657173003,240.594073289668,242.42674452846,244.254583908084,
246.077590669224,247.895765403118,249.709109115952,251.517622655718,253.321306153933,
255.120158508307,256.914178350452,258.703365891728,260.487722035817,262.267247747252,
264.041943497882,265.811808725263,267.576841842083,269.337042485588,271.092411376377,
272.842949509258,274.588657604438,276.329535570657,278.065582083882,279.796796101477,
281.52317806261,283.244728909889,284.961449523716,286.673340190148,288.380400084083,
290.082627714969,291.780023066484,293.472586950373,295.160320322865,296.843223757271,
298.521296928527,300.194538367774,301.862947415455,303.52652467465,305.185271096851,
306.839187456362,308.488273839576,310.132529174869,311.771952200738,313.406543178792,
315.036302979025,316.661232494277,318.281332134243,319.896601331416,321.507038585374,
323.112643620224,324.713417151504,326.309360111931,327.900473150148,329.486756141401,
331.068207812136,332.644827226795,334.216614855397,335.783571595684,337.345698254695,
338.902995064183,340.455461211314,342.003095305723,343.545897400926,345.083868288635,
346.61700885754,348.145319613451,349.668800211388,351.187449252492,352.701266177494,
354.210251601871,355.714406423013,357.213731342151,358.708226401169,360.197890559713,
361.682722663742,363.16272302571,364.637892482564,366.108231856115,367.573741494579,
369.034420826059,370.490268437672,371.941284141026,373.387468647284,374.828822827795,
376.265347260378,377.697041787529,379.123905186902,380.545936630721,381.963136620591,
383.375506010169,384.783045533945,386.185755370186,387.583634719144,388.97668229142,
390.364898211163,391.748283250902,393.126838232671,394.500563595686,395.869458975951,
397.233523045497,398.592755346206,399.947156506868,401.296727371737,402.641468569965,
403.981380099931,405.316460953543,406.64671008519,407.972127859158,409.292715080402,
410.608472500791,411.919400408179,413.225498227392,414.526764634166,415.823199528695,
417.11480361891,418.401577715991,419.683522328164,420.960637266417,422.232921360834,
423.50037389262,424.762995396215,426.020786682502,427.273748414782,428.52188071922,
429.765182810533,431.003653501635,432.237292988675,433.466102026433,434.690081371794,
435.909231398916,437.123551726338,438.333041098503,439.537699159955,440.737526554376,
441.932524074545,443.122692279243,444.308031125082,445.488539637957,446.664216882383,
447.835063276216,449.001079594246,450.162266520309,451.318624234112,452.47015230783),
 .UNSPECIFIED.);
#295=B_SPLINE_SURFACE_WITH_KNOTS('',1,3,((#907,#908,#909,#910,#911,#912,
#913,#914,#915,#916,#917,#918,#919,#920,#921),(#922,#923,#924,#925,#926,
#927,#928,#929,#930,#931,#932,#933,#934,#935,#936)),.UNSPECIFIED.,.F.,.F.,
 .F.,(2,2),(4,1,1,1,1,1,1,1,1,1,1,1,4),(2.38179838290946,2.54179838290946),
(452.47015230783,453.940290359542,454.72835395173,455.533200308334,456.338046664938,
457.126110257126,458.596248308839,460.066386360552,460.85444995274,461.659296309344,
462.464142665948,463.252206258136,464.722344309848),.UNSPECIFIED.);
#296=B_SPLINE_SURFACE_WITH_KNOTS('',1,3,((#937,#938,#939,#940,#941,#942,
#943,#944,#945,#946,#947,#948,#949,#950,#951,#952,#953,#954,#955,#956,#957,
#958,#959,#960,#961,#962,#963,#964,#965,#966,#967,#968,#969,#970,#971,#972,
#973,#974,#975,#976,#977,#978,#979,#980,#981,#982,#983,#984,#985,#986,#987,
#988,#989,#990,#991,#992,#993,#994,#995,#996,#997,#998,#999,#1000,#1001,
#1002,#1003,#1004,#1005,#1006,#1007,#1008,#1009,#1010,#1011,#1012,#1013,
#1014,#1015,#1016,#1017,#1018,#1019,#1020,#1021,#1022,#1023,#1024,#1025,
#1026,#1027,#1028,#1029,#1030,#1031,#1032,#1033,#1034,#1035,#1036,#1037,
#1038,#1039,#1040,#1041,#1042,#1043,#1044,#1045,#1046,#1047,#1048,#1049,
#1050,#1051,#1052,#1053,#1054,#1055,#1056,#1057,#1058,#1059,#1060,#1061,
#1062,#1063,#1064,#1065,#1066,#1067,#1068,#1069,#1070,#1071,#1072,#1073,
#1074,#1075,#1076,#1077,#1078,#1079,#1080,#1081,#1082,#1083,#1084,#1085,
#1086,#1087,#1088,#1089,#1090,#1091,#1092,#1093,#1094,#1095,#1096,#1097,
#1098,#1099,#1100,#1101,#1102,#1103,#1104,#1105,#1106,#1107,#1108,#1109,
#1110,#1111,#1112,#1113,#1114,#1115,#1116,#1117,#1118,#1119,#1120,#1121,
#1122,#1123,#1124,#1125,#1126,#1127,#1128,#1129,#1130,#1131,#1132,#1133,
#1134,#1135,#1136,#1137,#1138,#1139,#1140,#1141,#1142,#1143,#1144,#1145,
#1146,#1147,#1148,#1149,#1150,#1151,#1152,#1153,#1154,#1155,#1156,#1157,
#1158,#1159,#1160,#1161,#1162,#1163,#1164,#1165,#1166,#1167,#1168,#1169,
#1170,#1171,#1172,#1173,#1174,#1175,#1176,#1177,#1178,#1179,#1180,#1181,
#1182,#1183,#1184,#1185,#1186,#1187,#1188,#1189,#1190,#1191,#1192,#1193,
#1194,#1195,#1196),(#1197,#1198,#1199,#1200,#1201,#1202,#1203,#1204,#1205,
#1206,#1207,#1208,#1209,#1210,#1211,#1212,#1213,#1214,#1215,#1216,#1217,
#1218,#1219,#1220,#1221,#1222,#1223,#1224,#1225,#1226,#1227,#1228,#1229,
#1230,#1231,#1232,#1233,#1234,#1235,#1236,#1237,#1238,#1239,#1240,#1241,
#1242,#1243,#1244,#1245,#1246,#1247,#1248,#1249,#1250,#1251,#1252,#1253,
#1254,#1255,#1256,#1257,#1258,#1259,#1260,#1261,#1262,#1263,#1264,#1265,
#1266,#1267,#1268,#1269,#1270,#1271,#1272,#1273,#1274,#1275,#1276,#1277,
#1278,#1279,#1280,#1281,#1282,#1283,#1284,#1285,#1286,#1287,#1288,#1289,
#1290,#1291,#1292,#1293,#1294,#1295,#1296,#1297,#1298,#1299,#1300,#1301,
#1302,#1303,#1304,#1305,#1306,#1307,#1308,#1309,#1310,#1311,#1312,#1313,
#1314,#1315,#1316,#1317,#1318,#1319,#1320,#1321,#1322,#1323,#1324,#1325,
#1326,#1327,#1328,#1329,#1330,#1331,#1332,#1333,#1334,#1335,#1336,#1337,
#1338,#1339,#1340,#1341,#1342,#1343,#1344,#1345,#1346,#1347,#1348,#1349,
#1350,#1351,#1352,#1353,#1354,#1355,#1356,#1357,#1358,#1359,#1360,#1361,
#1362,#1363,#1364,#1365,#1366,#1367,#1368,#1369,#1370,#1371,#1372,#1373,
#1374,#1375,#1376,#1377,#1378,#1379,#1380,#1381,#1382,#1383,#1384,#1385,
#1386,#1387,#1388,#1389,#1390,#1391,#1392,#1393,#1394,#1395,#1396,#1397,
#1398,#1399,#1400,#1401,#1402,#1403,#1404,#1405,#1406,#1407,#1408,#1409,
#1410,#1411,#1412,#1413,#1414,#1415,#1416,#1417,#1418,#1419,#1420,#1421,
#1422,#1423,#1424,#1425,#1426,#1427,#1428,#1429,#1430,#1431,#1432,#1433,
#1434,#1435,#1436,#1437,#1438,#1439,#1440,#1441,#1442,#1443,#1444,#1445,
#1446,#1447,#1448,#1449,#1450,#1451,#1452,#1453,#1454,#1455,#1456)),
 .UNSPECIFIED.,.F.,.F.,.F.,(2,2),(4,1,1,1,1,1,1,1,1,1,1,1,1,1,1,1,1,1,1,
1,1,1,1,1,1,1,1,1,1,1,1,1,1,1,1,1,1,1,1,1,1,1,1,1,1,1,1,1,1,1,1,1,1,1,1,
1,1,1,1,1,1,1,1,1,1,1,1,1,1,1,1,1,1,1,1,1,1,1,1,1,1,1,1,1,1,1,1,1,1,1,1,
1,1,1,1,1,1,1,1,1,1,1,1,1,1,1,1,1,1,1,1,1,1,1,1,1,1,1,1,1,1,1,1,1,1,1,1,
1,1,1,1,1,1,1,1,1,1,1,1,1,1,1,1,1,1,1,1,1,1,1,1,1,1,1,1,1,1,1,1,1,1,1,1,
1,1,1,1,1,1,1,1,1,1,1,1,1,1,1,1,1,1,1,1,1,1,1,1,1,1,1,1,1,1,1,1,1,1,1,1,
1,1,1,1,1,1,1,1,1,1,1,1,1,1,1,1,1,1,1,1,1,1,1,1,1,1,1,1,1,1,1,1,1,1,1,1,
1,1,1,1,1,1,1,1,1,1,1,1,1,1,1,1,1,1,1,1,1,1,4),(0.16,1.16179838290946),
(0.,2.38245729200542,3.57414362987012,4.76260100467874,7.13566214604912,
9.50486281200516,11.868928832239,14.2282367671153,16.5827023057934,18.9323341421039,
21.277134201622,23.6171021887677,25.9522397315031,28.2825472654474,30.6080239148339,
32.9286677976576,35.2444786213747,37.5554572801613,39.8616050054091,42.1629226439068,
44.4594099544073,46.751065191794,49.0378872990536,51.3198768336143,53.5970349675632,
55.8693627718404,58.1368605152281,60.3995270052688,62.6573605546397,64.9103612257518,
67.1585300252716,69.4018681348511,71.6403762148608,73.8740537200632,76.1028988043993,
78.3269108464278,80.5460905839764,82.7604392002953,84.9699576325252,87.1746458921129,
89.3745025057265,91.569526111547,93.7597170583455,95.9450764256591,98.125605316385,
100.301304181937,102.472172162778,104.638207470078,106.799409880282,108.955780267707,
111.107319793796,113.254029237018,115.3959083347,117.532955410509,119.66516950649,
121.792551191154,123.915101581088,126.032821672705,128.145711688826,130.25377046685,
132.356996425579,134.455389676882,136.548951192886,138.637682082648,140.72158294347,
142.800653224162,144.874891164706,146.94429622969,149.008869150976,151.068611048765,
153.123522787642,155.173604344579,157.218854295779,159.259271385602,161.29485599272,
163.325609150779,165.351531888248,167.372624601161,169.388886441204,171.400315718734,
173.406912279035,175.408676975301,177.405610900292,179.397714763808,181.384988282099,
183.367429847722,185.345038601934,187.317815124491,189.285760476652,191.248875580489,
193.207160613039,195.160614441731,197.109235591651,199.053024224294,200.991981277427,
202.926107787706,204.855404289564,206.779870226042,208.699503923347,210.614304932263,
212.524273978882,214.429412120556,216.329720149529,218.225198008502,220.115844323414,
222.001657944987,223.882639281992,225.758789322398,227.630109020475,229.4965987171,
231.3582575754,233.215084005127,235.067077920604,236.914240154133,238.75657173003,
240.594073289668,242.42674452846,244.254583908084,246.077590669224,247.895765403118,
249.709109115952,251.517622655718,253.321306153933,255.120158508307,256.914178350452,
258.703365891728,260.487722035817,262.267247747252,264.041943497882,265.811808725263,
267.576841842083,269.337042485588,271.092411376377,272.842949509258,274.588657604438,
276.329535570657,278.065582083882,279.796796101477,281.52317806261,283.244728909889,
284.961449523716,286.673340190148,288.380400084083,290.082627714969,291.780023066484,
293.472586950373,295.160320322865,296.843223757271,298.521296928527,300.194538367774,
301.862947415455,303.52652467465,305.185271096851,306.839187456362,308.488273839576,
310.132529174869,311.771952200738,313.406543178792,315.036302979025,316.661232494277,
318.281332134243,319.896601331416,321.507038585374,323.112643620224,324.713417151504,
326.309360111931,327.900473150148,329.486756141401,331.068207812136,332.644827226795,
334.216614855397,335.783571595684,337.345698254695,338.902995064183,340.455461211314,
342.003095305723,343.545897400926,345.083868288635,346.61700885754,348.145319613451,
349.668800211388,351.187449252492,352.701266177494,354.210251601871,355.714406423013,
357.213731342151,358.708226401169,360.197890559713,361.682722663742,363.16272302571,
364.637892482564,366.108231856115,367.573741494579,369.034420826059,370.490268437672,
371.941284141026,373.387468647284,374.828822827795,376.265347260378,377.697041787529,
379.123905186902,380.545936630721,381.963136620591,383.375506010169,384.783045533945,
386.185755370186,387.583634719144,388.97668229142,390.364898211163,391.748283250902,
393.126838232671,394.500563595686,395.869458975951,397.233523045497,398.592755346206,
399.947156506868,401.296727371737,402.641468569965,403.981380099931,405.316460953543,
406.64671008519,407.972127859158,409.292715080402,410.608472500791,411.919400408179,
413.225498227392,414.526764634166,415.823199528695,417.11480361891,418.401577715991,
419.683522328164,420.960637266417,422.232921360834,423.50037389262,424.762995396215,
426.020786682502,427.273748414782,428.52188071922,429.765182810533,431.003653501635,
432.237292988675,433.466102026433,434.690081371794,435.909231398916,437.123551726338,
438.333041098503,439.537699159955,440.737526554376,441.932524074545,443.122692279243,
444.308031125082,445.488539637957,446.664216882383,447.835063276216,449.001079594246,
450.162266520309,451.318624234112,452.47015230783),.UNSPECIFIED.);
#297=B_SPLINE_SURFACE_WITH_KNOTS('',1,3,((#1457,#1458,#1459,#1460,#1461,
#1462,#1463,#1464,#1465,#1466,#1467,#1468,#1469,#1470,#1471,#1472,#1473,
#1474,#1475,#1476,#1477,#1478,#1479,#1480,#1481,#1482,#1483,#1484,#1485,
#1486,#1487,#1488,#1489,#1490,#1491,#1492,#1493,#1494,#1495,#1496,#1497,
#1498,#1499,#1500,#1501,#1502,#1503,#1504,#1505,#1506,#1507,#1508,#1509,
#1510,#1511,#1512,#1513,#1514,#1515,#1516,#1517,#1518,#1519,#1520,#1521,
#1522,#1523,#1524,#1525,#1526,#1527,#1528,#1529,#1530,#1531,#1532,#1533,
#1534,#1535,#1536,#1537,#1538,#1539,#1540,#1541,#1542,#1543,#1544,#1545,
#1546,#1547,#1548,#1549,#1550,#1551,#1552,#1553,#1554,#1555,#1556,#1557,
#1558,#1559,#1560,#1561,#1562,#1563,#1564,#1565,#1566,#1567,#1568,#1569,
#1570,#1571,#1572,#1573,#1574,#1575,#1576,#1577,#1578,#1579,#1580,#1581,
#1582,#1583,#1584,#1585,#1586,#1587,#1588,#1589,#1590,#1591,#1592,#1593,
#1594,#1595,#1596,#1597,#1598,#1599,#1600,#1601,#1602,#1603,#1604,#1605,
#1606,#1607,#1608,#1609,#1610,#1611,#1612,#1613,#1614,#1615,#1616,#1617,
#1618,#1619,#1620,#1621,#1622,#1623,#1624,#1625,#1626,#1627,#1628,#1629,
#1630,#1631,#1632,#1633,#1634,#1635,#1636,#1637,#1638,#1639,#1640,#1641,
#1642,#1643,#1644,#1645,#1646,#1647,#1648,#1649,#1650,#1651,#1652,#1653,
#1654,#1655,#1656,#1657,#1658,#1659,#1660,#1661,#1662,#1663,#1664,#1665,
#1666,#1667,#1668,#1669,#1670,#1671,#1672,#1673,#1674,#1675,#1676,#1677,
#1678,#1679,#1680,#1681,#1682,#1683,#1684,#1685,#1686,#1687,#1688,#1689,
#1690,#1691,#1692,#1693,#1694,#1695,#1696,#1697,#1698,#1699,#1700,#1701,
#1702,#1703,#1704,#1705,#1706,#1707,#1708,#1709,#1710,#1711,#1712,#1713,
#1714,#1715,#1716),(#1717,#1718,#1719,#1720,#1721,#1722,#1723,#1724,#1725,
#1726,#1727,#1728,#1729,#1730,#1731,#1732,#1733,#1734,#1735,#1736,#1737,
#1738,#1739,#1740,#1741,#1742,#1743,#1744,#1745,#1746,#1747,#1748,#1749,
#1750,#1751,#1752,#1753,#1754,#1755,#1756,#1757,#1758,#1759,#1760,#1761,
#1762,#1763,#1764,#1765,#1766,#1767,#1768,#1769,#1770,#1771,#1772,#1773,
#1774,#1775,#1776,#1777,#1778,#1779,#1780,#1781,#1782,#1783,#1784,#1785,
#1786,#1787,#1788,#1789,#1790,#1791,#1792,#1793,#1794,#1795,#1796,#1797,
#1798,#1799,#1800,#1801,#1802,#1803,#1804,#1805,#1806,#1807,#1808,#1809,
#1810,#1811,#1812,#1813,#1814,#1815,#1816,#1817,#1818,#1819,#1820,#1821,
#1822,#1823,#1824,#1825,#1826,#1827,#1828,#1829,#1830,#1831,#1832,#1833,
#1834,#1835,#1836,#1837,#1838,#1839,#1840,#1841,#1842,#1843,#1844,#1845,
#1846,#1847,#1848,#1849,#1850,#1851,#1852,#1853,#1854,#1855,#1856,#1857,
#1858,#1859,#1860,#1861,#1862,#1863,#1864,#1865,#1866,#1867,#1868,#1869,
#1870,#1871,#1872,#1873,#1874,#1875,#1876,#1877,#1878,#1879,#1880,#1881,
#1882,#1883,#1884,#1885,#1886,#1887,#1888,#1889,#1890,#1891,#1892,#1893,
#1894,#1895,#1896,#1897,#1898,#1899,#1900,#1901,#1902,#1903,#1904,#1905,
#1906,#1907,#1908,#1909,#1910,#1911,#1912,#1913,#1914,#1915,#1916,#1917,
#1918,#1919,#1920,#1921,#1922,#1923,#1924,#1925,#1926,#1927,#1928,#1929,
#1930,#1931,#1932,#1933,#1934,#1935,#1936,#1937,#1938,#1939,#1940,#1941,
#1942,#1943,#1944,#1945,#1946,#1947,#1948,#1949,#1950,#1951,#1952,#1953,
#1954,#1955,#1956,#1957,#1958,#1959,#1960,#1961,#1962,#1963,#1964,#1965,
#1966,#1967,#1968,#1969,#1970,#1971,#1972,#1973,#1974,#1975,#1976)),
 .UNSPECIFIED.,.F.,.F.,.F.,(2,2),(4,1,1,1,1,1,1,1,1,1,1,1,1,1,1,1,1,1,1,
1,1,1,1,1,1,1,1,1,1,1,1,1,1,1,1,1,1,1,1,1,1,1,1,1,1,1,1,1,1,1,1,1,1,1,1,
1,1,1,1,1,1,1,1,1,1,1,1,1,1,1,1,1,1,1,1,1,1,1,1,1,1,1,1,1,1,1,1,1,1,1,1,
1,1,1,1,1,1,1,1,1,1,1,1,1,1,1,1,1,1,1,1,1,1,1,1,1,1,1,1,1,1,1,1,1,1,1,1,
1,1,1,1,1,1,1,1,1,1,1,1,1,1,1,1,1,1,1,1,1,1,1,1,1,1,1,1,1,1,1,1,1,1,1,1,
1,1,1,1,1,1,1,1,1,1,1,1,1,1,1,1,1,1,1,1,1,1,1,1,1,1,1,1,1,1,1,1,1,1,1,1,
1,1,1,1,1,1,1,1,1,1,1,1,1,1,1,1,1,1,1,1,1,1,1,1,1,1,1,1,1,1,1,1,1,1,1,1,
1,1,1,1,1,1,1,1,1,1,1,1,1,1,1,1,1,1,1,1,1,1,4),(1.16179838290946,1.38179838290946),
(0.,2.38245729200542,3.57414362987012,4.76260100467874,7.13566214604912,
9.50486281200516,11.868928832239,14.2282367671153,16.5827023057934,18.9323341421039,
21.277134201622,23.6171021887677,25.9522397315031,28.2825472654474,30.6080239148339,
32.9286677976576,35.2444786213747,37.5554572801613,39.8616050054091,42.1629226439068,
44.4594099544073,46.751065191794,49.0378872990536,51.3198768336143,53.5970349675632,
55.8693627718404,58.1368605152281,60.3995270052688,62.6573605546397,64.9103612257518,
67.1585300252716,69.4018681348511,71.6403762148608,73.8740537200632,76.1028988043993,
78.3269108464278,80.5460905839764,82.7604392002953,84.9699576325252,87.1746458921129,
89.3745025057265,91.569526111547,93.7597170583455,95.9450764256591,98.125605316385,
100.301304181937,102.472172162778,104.638207470078,106.799409880282,108.955780267707,
111.107319793796,113.254029237018,115.3959083347,117.532955410509,119.66516950649,
121.792551191154,123.915101581088,126.032821672705,128.145711688826,130.25377046685,
132.356996425579,134.455389676882,136.548951192886,138.637682082648,140.72158294347,
142.800653224162,144.874891164706,146.94429622969,149.008869150976,151.068611048765,
153.123522787642,155.173604344579,157.218854295779,159.259271385602,161.29485599272,
163.325609150779,165.351531888248,167.372624601161,169.388886441204,171.400315718734,
173.406912279035,175.408676975301,177.405610900292,179.397714763808,181.384988282099,
183.367429847722,185.345038601934,187.317815124491,189.285760476652,191.248875580489,
193.207160613039,195.160614441731,197.109235591651,199.053024224294,200.991981277427,
202.926107787706,204.855404289564,206.779870226042,208.699503923347,210.614304932263,
212.524273978882,214.429412120556,216.329720149529,218.225198008502,220.115844323414,
222.001657944987,223.882639281992,225.758789322398,227.630109020475,229.4965987171,
231.3582575754,233.215084005127,235.067077920604,236.914240154133,238.75657173003,
240.594073289668,242.42674452846,244.254583908084,246.077590669224,247.895765403118,
249.709109115952,251.517622655718,253.321306153933,255.120158508307,256.914178350452,
258.703365891728,260.487722035817,262.267247747252,264.041943497882,265.811808725263,
267.576841842083,269.337042485588,271.092411376377,272.842949509258,274.588657604438,
276.329535570657,278.065582083882,279.796796101477,281.52317806261,283.244728909889,
284.961449523716,286.673340190148,288.380400084083,290.082627714969,291.780023066484,
293.472586950373,295.160320322865,296.843223757271,298.521296928527,300.194538367774,
301.862947415455,303.52652467465,305.185271096851,306.839187456362,308.488273839576,
310.132529174869,311.771952200738,313.406543178792,315.036302979025,316.661232494277,
318.281332134243,319.896601331416,321.507038585374,323.112643620224,324.713417151504,
326.309360111931,327.900473150148,329.486756141401,331.068207812136,332.644827226795,
334.216614855397,335.783571595684,337.345698254695,338.902995064183,340.455461211314,
342.003095305723,343.545897400926,345.083868288635,346.61700885754,348.145319613451,
349.668800211388,351.187449252492,352.701266177494,354.210251601871,355.714406423013,
357.213731342151,358.708226401169,360.197890559713,361.682722663742,363.16272302571,
364.637892482564,366.108231856115,367.573741494579,369.034420826059,370.490268437672,
371.941284141026,373.387468647284,374.828822827795,376.265347260378,377.697041787529,
379.123905186902,380.545936630721,381.963136620591,383.375506010169,384.783045533945,
386.185755370186,387.583634719144,388.97668229142,390.364898211163,391.748283250902,
393.126838232671,394.500563595686,395.869458975951,397.233523045497,398.592755346206,
399.947156506868,401.296727371737,402.641468569965,403.981380099931,405.316460953543,
406.64671008519,407.972127859158,409.292715080402,410.608472500791,411.919400408179,
413.225498227392,414.526764634166,415.823199528695,417.11480361891,418.401577715991,
419.683522328164,420.960637266417,422.232921360834,423.50037389262,424.762995396215,
426.020786682502,427.273748414782,428.52188071922,429.765182810533,431.003653501635,
432.237292988675,433.466102026433,434.690081371794,435.909231398916,437.123551726338,
438.333041098503,439.537699159955,440.737526554376,441.932524074545,443.122692279243,
444.308031125082,445.488539637957,446.664216882383,447.835063276216,449.001079594246,
450.162266520309,451.318624234112,452.47015230783),.UNSPECIFIED.);
#298=B_SPLINE_SURFACE_WITH_KNOTS('',1,3,((#1977,#1978,#1979,#1980,#1981,
#1982,#1983,#1984,#1985,#1986,#1987,#1988,#1989,#1990,#1991,#1992,#1993,
#1994,#1995,#1996,#1997,#1998,#1999,#2000,#2001,#2002,#2003,#2004,#2005,
#2006,#2007,#2008,#2009,#2010,#2011,#2012,#2013,#2014,#2015,#2016,#2017,
#2018,#2019,#2020,#2021,#2022,#2023,#2024,#2025,#2026,#2027,#2028,#2029,
#2030,#2031,#2032,#2033,#2034,#2035,#2036,#2037,#2038,#2039,#2040,#2041,
#2042,#2043,#2044,#2045,#2046,#2047,#2048,#2049,#2050,#2051,#2052,#2053,
#2054,#2055,#2056,#2057,#2058,#2059,#2060,#2061,#2062,#2063,#2064,#2065,
#2066,#2067,#2068,#2069,#2070,#2071,#2072,#2073,#2074,#2075,#2076,#2077,
#2078,#2079,#2080,#2081,#2082,#2083,#2084,#2085,#2086,#2087,#2088,#2089,
#2090,#2091,#2092,#2093,#2094,#2095,#2096,#2097,#2098,#2099,#2100,#2101,
#2102,#2103,#2104,#2105,#2106,#2107,#2108,#2109,#2110,#2111,#2112,#2113,
#2114,#2115,#2116,#2117,#2118,#2119,#2120,#2121,#2122,#2123,#2124,#2125,
#2126,#2127,#2128,#2129,#2130,#2131,#2132,#2133,#2134,#2135,#2136,#2137,
#2138,#2139,#2140,#2141,#2142,#2143,#2144,#2145,#2146,#2147,#2148,#2149,
#2150,#2151,#2152,#2153,#2154,#2155,#2156,#2157,#2158,#2159,#2160,#2161,
#2162,#2163,#2164,#2165,#2166,#2167,#2168,#2169,#2170,#2171,#2172,#2173,
#2174,#2175,#2176,#2177,#2178,#2179,#2180,#2181,#2182,#2183,#2184,#2185,
#2186,#2187,#2188,#2189,#2190,#2191,#2192,#2193,#2194,#2195,#2196,#2197,
#2198,#2199,#2200,#2201,#2202,#2203,#2204,#2205,#2206,#2207,#2208,#2209,
#2210,#2211,#2212,#2213,#2214,#2215,#2216,#2217,#2218,#2219,#2220,#2221,
#2222,#2223,#2224,#2225,#2226,#2227,#2228,#2229,#2230,#2231,#2232,#2233,
#2234,#2235,#2236),(#2237,#2238,#2239,#2240,#2241,#2242,#2243,#2244,#2245,
#2246,#2247,#2248,#2249,#2250,#2251,#2252,#2253,#2254,#2255,#2256,#2257,
#2258,#2259,#2260,#2261,#2262,#2263,#2264,#2265,#2266,#2267,#2268,#2269,
#2270,#2271,#2272,#2273,#2274,#2275,#2276,#2277,#2278,#2279,#2280,#2281,
#2282,#2283,#2284,#2285,#2286,#2287,#2288,#2289,#2290,#2291,#2292,#2293,
#2294,#2295,#2296,#2297,#2298,#2299,#2300,#2301,#2302,#2303,#2304,#2305,
#2306,#2307,#2308,#2309,#2310,#2311,#2312,#2313,#2314,#2315,#2316,#2317,
#2318,#2319,#2320,#2321,#2322,#2323,#2324,#2325,#2326,#2327,#2328,#2329,
#2330,#2331,#2332,#2333,#2334,#2335,#2336,#2337,#2338,#2339,#2340,#2341,
#2342,#2343,#2344,#2345,#2346,#2347,#2348,#2349,#2350,#2351,#2352,#2353,
#2354,#2355,#2356,#2357,#2358,#2359,#2360,#2361,#2362,#2363,#2364,#2365,
#2366,#2367,#2368,#2369,#2370,#2371,#2372,#2373,#2374,#2375,#2376,#2377,
#2378,#2379,#2380,#2381,#2382,#2383,#2384,#2385,#2386,#2387,#2388,#2389,
#2390,#2391,#2392,#2393,#2394,#2395,#2396,#2397,#2398,#2399,#2400,#2401,
#2402,#2403,#2404,#2405,#2406,#2407,#2408,#2409,#2410,#2411,#2412,#2413,
#2414,#2415,#2416,#2417,#2418,#2419,#2420,#2421,#2422,#2423,#2424,#2425,
#2426,#2427,#2428,#2429,#2430,#2431,#2432,#2433,#2434,#2435,#2436,#2437,
#2438,#2439,#2440,#2441,#2442,#2443,#2444,#2445,#2446,#2447,#2448,#2449,
#2450,#2451,#2452,#2453,#2454,#2455,#2456,#2457,#2458,#2459,#2460,#2461,
#2462,#2463,#2464,#2465,#2466,#2467,#2468,#2469,#2470,#2471,#2472,#2473,
#2474,#2475,#2476,#2477,#2478,#2479,#2480,#2481,#2482,#2483,#2484,#2485,
#2486,#2487,#2488,#2489,#2490,#2491,#2492,#2493,#2494,#2495,#2496)),
 .UNSPECIFIED.,.F.,.F.,.F.,(2,2),(4,1,1,1,1,1,1,1,1,1,1,1,1,1,1,1,1,1,1,
1,1,1,1,1,1,1,1,1,1,1,1,1,1,1,1,1,1,1,1,1,1,1,1,1,1,1,1,1,1,1,1,1,1,1,1,
1,1,1,1,1,1,1,1,1,1,1,1,1,1,1,1,1,1,1,1,1,1,1,1,1,1,1,1,1,1,1,1,1,1,1,1,
1,1,1,1,1,1,1,1,1,1,1,1,1,1,1,1,1,1,1,1,1,1,1,1,1,1,1,1,1,1,1,1,1,1,1,1,
1,1,1,1,1,1,1,1,1,1,1,1,1,1,1,1,1,1,1,1,1,1,1,1,1,1,1,1,1,1,1,1,1,1,1,1,
1,1,1,1,1,1,1,1,1,1,1,1,1,1,1,1,1,1,1,1,1,1,1,1,1,1,1,1,1,1,1,1,1,1,1,1,
1,1,1,1,1,1,1,1,1,1,1,1,1,1,1,1,1,1,1,1,1,1,1,1,1,1,1,1,1,1,1,1,1,1,1,1,
1,1,1,1,1,1,1,1,1,1,1,1,1,1,1,1,1,1,1,1,1,1,4),(1.38179838290946,2.38179838290946),
(0.,2.38245729200542,3.57414362987012,4.76260100467874,7.13566214604912,
9.50486281200516,11.868928832239,14.2282367671153,16.5827023057934,18.9323341421039,
21.277134201622,23.6171021887677,25.9522397315031,28.2825472654474,30.6080239148339,
32.9286677976576,35.2444786213747,37.5554572801613,39.8616050054091,42.1629226439068,
44.4594099544073,46.751065191794,49.0378872990536,51.3198768336143,53.5970349675632,
55.8693627718404,58.1368605152281,60.3995270052688,62.6573605546397,64.9103612257518,
67.1585300252716,69.4018681348511,71.6403762148608,73.8740537200632,76.1028988043993,
78.3269108464278,80.5460905839764,82.7604392002953,84.9699576325252,87.1746458921129,
89.3745025057265,91.569526111547,93.7597170583455,95.9450764256591,98.125605316385,
100.301304181937,102.472172162778,104.638207470078,106.799409880282,108.955780267707,
111.107319793796,113.254029237018,115.3959083347,117.532955410509,119.66516950649,
121.792551191154,123.915101581088,126.032821672705,128.145711688826,130.25377046685,
132.356996425579,134.455389676882,136.548951192886,138.637682082648,140.72158294347,
142.800653224162,144.874891164706,146.94429622969,149.008869150976,151.068611048765,
153.123522787642,155.173604344579,157.218854295779,159.259271385602,161.29485599272,
163.325609150779,165.351531888248,167.372624601161,169.388886441204,171.400315718734,
173.406912279035,175.408676975301,177.405610900292,179.397714763808,181.384988282099,
183.367429847722,185.345038601934,187.317815124491,189.285760476652,191.248875580489,
193.207160613039,195.160614441731,197.109235591651,199.053024224294,200.991981277427,
202.926107787706,204.855404289564,206.779870226042,208.699503923347,210.614304932263,
212.524273978882,214.429412120556,216.329720149529,218.225198008502,220.115844323414,
222.001657944987,223.882639281992,225.758789322398,227.630109020475,229.4965987171,
231.3582575754,233.215084005127,235.067077920604,236.914240154133,238.75657173003,
240.594073289668,242.42674452846,244.254583908084,246.077590669224,247.895765403118,
249.709109115952,251.517622655718,253.321306153933,255.120158508307,256.914178350452,
258.703365891728,260.487722035817,262.267247747252,264.041943497882,265.811808725263,
267.576841842083,269.337042485588,271.092411376377,272.842949509258,274.588657604438,
276.329535570657,278.065582083882,279.796796101477,281.52317806261,283.244728909889,
284.961449523716,286.673340190148,288.380400084083,290.082627714969,291.780023066484,
293.472586950373,295.160320322865,296.843223757271,298.521296928527,300.194538367774,
301.862947415455,303.52652467465,305.185271096851,306.839187456362,308.488273839576,
310.132529174869,311.771952200738,313.406543178792,315.036302979025,316.661232494277,
318.281332134243,319.896601331416,321.507038585374,323.112643620224,324.713417151504,
326.309360111931,327.900473150148,329.486756141401,331.068207812136,332.644827226795,
334.216614855397,335.783571595684,337.345698254695,338.902995064183,340.455461211314,
342.003095305723,343.545897400926,345.083868288635,346.61700885754,348.145319613451,
349.668800211388,351.187449252492,352.701266177494,354.210251601871,355.714406423013,
357.213731342151,358.708226401169,360.197890559713,361.682722663742,363.16272302571,
364.637892482564,366.108231856115,367.573741494579,369.034420826059,370.490268437672,
371.941284141026,373.387468647284,374.828822827795,376.265347260378,377.697041787529,
379.123905186902,380.545936630721,381.963136620591,383.375506010169,384.783045533945,
386.185755370186,387.583634719144,388.97668229142,390.364898211163,391.748283250902,
393.126838232671,394.500563595686,395.869458975951,397.233523045497,398.592755346206,
399.947156506868,401.296727371737,402.641468569965,403.981380099931,405.316460953543,
406.64671008519,407.972127859158,409.292715080402,410.608472500791,411.919400408179,
413.225498227392,414.526764634166,415.823199528695,417.11480361891,418.401577715991,
419.683522328164,420.960637266417,422.232921360834,423.50037389262,424.762995396215,
426.020786682502,427.273748414782,428.52188071922,429.765182810533,431.003653501635,
432.237292988675,433.466102026433,434.690081371794,435.909231398916,437.123551726338,
438.333041098503,439.537699159955,440.737526554376,441.932524074545,443.122692279243,
444.308031125082,445.488539637957,446.664216882383,447.835063276216,449.001079594246,
450.162266520309,451.318624234112,452.47015230783),.UNSPECIFIED.);
#299=B_SPLINE_SURFACE_WITH_KNOTS('',1,3,((#2497,#2498,#2499,#2500,#2501,
#2502,#2503,#2504,#2505,#2506,#2507,#2508,#2509,#2510,#2511),(#2512,#2513,
#2514,#2515,#2516,#2517,#2518,#2519,#2520,#2521,#2522,#2523,#2524,#2525,
#2526)),.UNSPECIFIED.,.F.,.F.,.F.,(2,2),(4,1,1,1,1,1,1,1,1,1,1,1,4),(0.16,
1.16179838290946),(452.47015230783,453.940290359542,454.72835395173,455.533200308334,
456.338046664938,457.126110257126,458.596248308839,460.066386360552,460.85444995274,
461.659296309344,462.464142665948,463.252206258136,464.722344309848),
 .UNSPECIFIED.);
#300=B_SPLINE_SURFACE_WITH_KNOTS('',1,3,((#2527,#2528,#2529,#2530,#2531,
#2532,#2533,#2534,#2535,#2536,#2537,#2538,#2539,#2540,#2541),(#2542,#2543,
#2544,#2545,#2546,#2547,#2548,#2549,#2550,#2551,#2552,#2553,#2554,#2555,
#2556)),.UNSPECIFIED.,.F.,.F.,.F.,(2,2),(4,1,1,1,1,1,1,1,1,1,1,1,4),(1.16179838290946,
1.38179838290946),(452.47015230783,453.940290359542,454.72835395173,455.533200308334,
456.338046664938,457.126110257126,458.596248308839,460.066386360552,460.85444995274,
461.659296309344,462.464142665948,463.252206258136,464.722344309848),
 .UNSPECIFIED.);
#301=B_SPLINE_SURFACE_WITH_KNOTS('',1,3,((#2557,#2558,#2559,#2560,#2561,
#2562,#2563,#2564,#2565,#2566,#2567,#2568,#2569,#2570,#2571),(#2572,#2573,
#2574,#2575,#2576,#2577,#2578,#2579,#2580,#2581,#2582,#2583,#2584,#2585,
#2586)),.UNSPECIFIED.,.F.,.F.,.F.,(2,2),(4,1,1,1,1,1,1,1,1,1,1,1,4),(1.38179838290946,
2.38179838290946),(452.47015230783,453.940290359542,454.72835395173,455.533200308334,
456.338046664938,457.126110257126,458.596248308839,460.066386360552,460.85444995274,
461.659296309344,462.464142665948,463.252206258136,464.722344309848),
 .UNSPECIFIED.);
#302=B_SPLINE_SURFACE_WITH_KNOTS('',3,1,((#2588,#2589),(#2590,#2591),(#2592,
#2593),(#2594,#2595)),.UNSPECIFIED.,.F.,.F.,.F.,(4,4),(2,2),(0.,6.),(0.,
0.751348787182092),.UNSPECIFIED.);
#303=B_SPLINE_SURFACE_WITH_KNOTS('',3,1,((#2596,#2597),(#2598,#2599),(#2600,
#2601),(#2602,#2603)),.UNSPECIFIED.,.F.,.F.,.F.,(4,4),(2,2),(0.,6.),(0.751348787182092,
0.971348787182092),.UNSPECIFIED.);
#304=B_SPLINE_SURFACE_WITH_KNOTS('',3,1,((#2604,#2605),(#2606,#2607),(#2608,
#2609),(#2610,#2611)),.UNSPECIFIED.,.F.,.F.,.F.,(4,4),(2,2),(0.,6.),(0.971348787182092,
1.72134878718209),.UNSPECIFIED.);
#305=B_SPLINE_SURFACE_WITH_KNOTS('',1,3,((#2612,#2613,#2614,#2615),(#2616,
#2617,#2618,#2619)),.UNSPECIFIED.,.F.,.F.,.F.,(2,2),(4,4),(1.16000203574655,
1.33500203574655),(0.,3.81608438061844),.UNSPECIFIED.);
#306=B_SPLINE_SURFACE_WITH_KNOTS('',3,1,((#2620,#2621),(#2622,#2623),(#2624,
#2625),(#2626,#2627)),.UNSPECIFIED.,.F.,.F.,.F.,(4,4),(2,2),(0.,6.),(1.72134878718209,
1.89634878718209),.UNSPECIFIED.);
#307=(
BOUNDED_SURFACE()
B_SPLINE_SURFACE(2,1,((#351,#352),(#353,#354),(#355,#356),(#357,#358),(#359,
#360)),.UNSPECIFIED.,.F.,.F.,.F.)
B_SPLINE_SURFACE_WITH_KNOTS((3,2,3),(2,2),(-0.722423904147025,-0.53621195207351,
-0.349999999999994),(0.,0.175),.UNSPECIFIED.)
GEOMETRIC_REPRESENTATION_ITEM()
RATIONAL_B_SPLINE_SURFACE(((1.,1.),(0.893583829780912,0.893583829780912),
(1.,1.),(0.893583829780912,0.893583829780912),(1.,1.)))
REPRESENTATION_ITEM('')
SURFACE()
);
#308=PLANE('',#333);
#309=PLANE('',#334);
#310=PLANE('',#335);
#311=PLANE('',#336);
#312=PLANE('',#337);
#313=SHAPE_DEFINITION_REPRESENTATION(#314,#331);
#314=PRODUCT_DEFINITION_SHAPE('Document','',#316);
#315=PRODUCT_DEFINITION_CONTEXT('3D Mechanical Parts',#320,'design');
#316=PRODUCT_DEFINITION('A','First version',#317,#315);
#317=PRODUCT_DEFINITION_FORMATION_WITH_SPECIFIED_SOURCE('A',
'First version',#322,.MADE.);
#318=PRODUCT_RELATED_PRODUCT_CATEGORY('tool','tool',(#322));
#319=APPLICATION_PROTOCOL_DEFINITION('Draft International Standard',
'automotive_design',1999,#320);
#320=APPLICATION_CONTEXT(
'data for automotive mechanical design processes');
#321=PRODUCT_CONTEXT('3D Mechanical Parts',#320,'mechanical');
#322=PRODUCT('Document','Document','Rhino converted to STEP',(#321));
#323=(
LENGTH_UNIT()
NAMED_UNIT(*)
SI_UNIT(.MILLI.,.METRE.)
);
#324=(
NAMED_UNIT(*)
PLANE_ANGLE_UNIT()
SI_UNIT($,.RADIAN.)
);
#325=DIMENSIONAL_EXPONENTS(0.,0.,0.,0.,0.,0.,0.);
#326=PLANE_ANGLE_MEASURE_WITH_UNIT(PLANE_ANGLE_MEASURE(0.01745329252),#324);
#327=(
CONVERSION_BASED_UNIT('DEGREES',#326)
NAMED_UNIT(#325)
PLANE_ANGLE_UNIT()
);
#328=(
NAMED_UNIT(*)
SI_UNIT($,.STERADIAN.)
SOLID_ANGLE_UNIT()
);
#329=UNCERTAINTY_MEASURE_WITH_UNIT(LENGTH_MEASURE(0.001),#323,
'DISTANCE_ACCURACY_VALUE',
'Maximum model space distance between geometric entities at asserted c
onnectivities');
#330=(
GEOMETRIC_REPRESENTATION_CONTEXT(3)
GLOBAL_UNCERTAINTY_ASSIGNED_CONTEXT((#329))
GLOBAL_UNIT_ASSIGNED_CONTEXT((#328,#327,#323))
REPRESENTATION_CONTEXT('ID1','3D')
);
#331=SHAPE_REPRESENTATION('Document',(#332,#338),#330);
#332=AXIS2_PLACEMENT_3D('',#348,#339,#340);
#333=AXIS2_PLACEMENT_3D('',#349,#341,$);
#334=AXIS2_PLACEMENT_3D('',#350,#342,$);
#335=AXIS2_PLACEMENT_3D('',#361,#343,$);
#336=AXIS2_PLACEMENT_3D('',#386,#344,$);
#337=AXIS2_PLACEMENT_3D('',#2587,#345,$);
#338=AXIS2_PLACEMENT_3D('',#3852,#346,#347);
#339=DIRECTION('',(0.,0.,1.));
#340=DIRECTION('',(1.,0.,0.));
#341=DIRECTION('',(0.,0.,-1.));
#342=DIRECTION('',(0.,0.,1.));
#343=DIRECTION('',(0.206700384979813,-0.978404288037004,0.));
#344=DIRECTION('',(0.999905425360042,0.013752830092514,0.));
#345=DIRECTION('',(1.,0.,0.));
#346=DIRECTION('',(0.,0.,1.));
#347=DIRECTION('',(1.,0.,0.));
#348=CARTESIAN_POINT('',(0.,0.,0.));
#349=CARTESIAN_POINT('',(161.99,-139.267443983379,0.));
#350=CARTESIAN_POINT('',(161.99,-139.267443983379,0.175));
#351=CARTESIAN_POINT('',(162.158427066699,-139.257443983379,0.));
#352=CARTESIAN_POINT('',(162.158427066699,-139.257443983379,0.175));
#353=CARTESIAN_POINT('',(162.129569791086,-139.161206351323,0.));
#354=CARTESIAN_POINT('',(162.129569791086,-139.161206351323,0.175));
#355=CARTESIAN_POINT('',(162.189549389724,-139.080603175662,0.));
#356=CARTESIAN_POINT('',(162.189549389724,-139.080603175662,0.175));
#357=CARTESIAN_POINT('',(162.249528988362,-139.,0.));
#358=CARTESIAN_POINT('',(162.249528988362,-139.,0.175));
#359=CARTESIAN_POINT('',(162.35,-139.,0.));
#360=CARTESIAN_POINT('',(162.35,-139.,0.175));
#361=CARTESIAN_POINT('',(163.011809657383,-142.458767813827,-0.01));
#362=CARTESIAN_POINT('',(162.,-139.,0.175));
#363=CARTESIAN_POINT('',(162.666666666667,-140.083333333333,0.175));
#364=CARTESIAN_POINT('',(163.333333333333,-141.166666666667,0.175));
#365=CARTESIAN_POINT('',(164.,-142.25,0.175));
#366=CARTESIAN_POINT('',(161.021593720196,-139.20670080577,0.160000000000911));
#367=CARTESIAN_POINT('',(161.688260386862,-140.290034139104,0.160000000000911));
#368=CARTESIAN_POINT('',(162.354927053529,-141.373367472437,0.160000000000911));
#369=CARTESIAN_POINT('',(163.021593720196,-142.45670080577,0.160000000000911));
#370=CARTESIAN_POINT('',(161.021593720196,-139.20670080577,0.160000000000911));
#371=CARTESIAN_POINT('',(161.688260386862,-140.290034139104,0.160000000000911));
#372=CARTESIAN_POINT('',(162.354927053529,-141.373367472437,0.160000000000911));
#373=CARTESIAN_POINT('',(163.021593720196,-142.45670080577,0.160000000000911));
#374=CARTESIAN_POINT('',(161.021593720181,-139.206700805769,0.));
#375=CARTESIAN_POINT('',(161.688260386847,-140.290034139103,0.));
#376=CARTESIAN_POINT('',(162.354927053514,-141.373367472436,0.));
#377=CARTESIAN_POINT('',(163.021593720181,-142.456700805769,0.));
#378=CARTESIAN_POINT('',(161.021593720181,-139.206700805769,0.));
#379=CARTESIAN_POINT('',(161.688260386847,-140.290034139103,0.));
#380=CARTESIAN_POINT('',(162.354927053514,-141.373367472436,0.));
#381=CARTESIAN_POINT('',(163.021593720181,-142.456700805769,0.));
#382=CARTESIAN_POINT('',(162.,-139.,0.));
#383=CARTESIAN_POINT('',(162.666666666667,-140.083333333333,0.));
#384=CARTESIAN_POINT('',(163.333333333333,-141.166666666667,0.));
#385=CARTESIAN_POINT('',(164.,-142.25,0.));
#386=CARTESIAN_POINT('',(162.013890358393,-124.059904479614,-0.00999999999999997));
#387=CARTESIAN_POINT('',(162.,-139.25,0.));
#388=CARTESIAN_POINT('',(161.20628120964,-139.238936326906,0.));
#389=CARTESIAN_POINT('',(160.016194749845,-139.134457472781,0.));
#390=CARTESIAN_POINT('',(158.458674441971,-138.823019048275,0.));
#391=CARTESIAN_POINT('',(156.930968509973,-138.397606236733,0.));
#392=CARTESIAN_POINT('',(155.091636380898,-137.658498962568,0.));
#393=CARTESIAN_POINT('',(153.041136009255,-136.459695644647,0.));
#394=CARTESIAN_POINT('',(151.192899099003,-134.975761945213,0.));
#395=CARTESIAN_POINT('',(149.584590975293,-133.239080133237,0.));
#396=CARTESIAN_POINT('',(148.25281550808,-131.291058957086,0.));
#397=CARTESIAN_POINT('',(147.222869974318,-129.172507883842,0.));
#398=CARTESIAN_POINT('',(146.516226843929,-126.928983950821,0.));
#399=CARTESIAN_POINT('',(146.147477249509,-124.612686065398,0.));
#400=CARTESIAN_POINT('',(146.122711737593,-122.270058782317,0.));
#401=CARTESIAN_POINT('',(146.441152141317,-119.956184237323,0.));
#402=CARTESIAN_POINT('',(147.094397207938,-117.717854472642,0.));
#403=CARTESIAN_POINT('',(148.067515918526,-115.603454826846,0.));
#404=CARTESIAN_POINT('',(149.337049357845,-113.65985728198,0.));
#405=CARTESIAN_POINT('',(150.875488241882,-111.926409120675,0.));
#406=CARTESIAN_POINT('',(152.648014597433,-110.440755456159,0.));
#407=CARTESIAN_POINT('',(154.614484126268,-109.234263379757,0.));
#408=CARTESIAN_POINT('',(156.73270099596,-108.331093136435,0.));
#409=CARTESIAN_POINT('',(158.955566736548,-107.749906270783,0.));
#410=CARTESIAN_POINT('',(161.234952841226,-107.501687536335,0.));
#411=CARTESIAN_POINT('',(163.52172336457,-107.59053984836,0.));
#412=CARTESIAN_POINT('',(165.765408567735,-108.013064207132,0.));
#413=CARTESIAN_POINT('',(167.91837486431,-108.758633042291,0.));
#414=CARTESIAN_POINT('',(169.935133141716,-109.810481228575,0.));
#415=CARTESIAN_POINT('',(171.770027554399,-111.142761975576,0.));
#416=CARTESIAN_POINT('',(173.387441092081,-112.727696123649,0.));
#417=CARTESIAN_POINT('',(174.751611276778,-114.528992926315,0.));
#418=CARTESIAN_POINT('',(175.834185674508,-116.506575058446,0.));
#419=CARTESIAN_POINT('',(176.612915009641,-118.616367536987,0.));
#420=CARTESIAN_POINT('',(177.072780238207,-120.81329557476,0.));
#421=CARTESIAN_POINT('',(177.204874821995,-123.049395093862,0.));
#422=CARTESIAN_POINT('',(177.007930391218,-125.274799755581,0.));
#423=CARTESIAN_POINT('',(176.487494846329,-127.44346093542,0.));
#424=CARTESIAN_POINT('',(175.656168839798,-129.507752797628,0.));
#425=CARTESIAN_POINT('',(174.533338085418,-131.423419235084,0.));
#426=CARTESIAN_POINT('',(173.144987332746,-133.149436661106,0.));
#427=CARTESIAN_POINT('',(171.520671380976,-134.650681528017,0.));
#428=CARTESIAN_POINT('',(169.699575212145,-135.893173429231,0.));
#429=CARTESIAN_POINT('',(167.718996316369,-136.853652135691,0.));
#430=CARTESIAN_POINT('',(165.622858811226,-137.51158338422,0.));
#431=CARTESIAN_POINT('',(163.459314142292,-137.85373357419,0.));
#432=CARTESIAN_POINT('',(161.273290487514,-137.874907559788,0.));
#433=CARTESIAN_POINT('',(159.110617607258,-137.575082650259,0.));
#434=CARTESIAN_POINT('',(157.023488995635,-136.96358510711,0.));
#435=CARTESIAN_POINT('',(155.049928800941,-136.052999080487,0.));
#436=CARTESIAN_POINT('',(153.237602117229,-134.866536034049,0.));
#437=CARTESIAN_POINT('',(151.62130157776,-133.429054486412,0.));
#438=CARTESIAN_POINT('',(150.237783743132,-131.775055064288,0.));
#439=CARTESIAN_POINT('',(149.113649494836,-129.938872100302,0.));
#440=CARTESIAN_POINT('',(148.273408488021,-127.962569885563,0.));
#441=CARTESIAN_POINT('',(147.733477308911,-125.889074923399,0.));
#442=CARTESIAN_POINT('',(147.504194970651,-123.763118683876,0.));
#443=CARTESIAN_POINT('',(147.589296923942,-121.631441880782,0.));
#444=CARTESIAN_POINT('',(147.985243612117,-119.540641770774,0.));
#445=CARTESIAN_POINT('',(148.682523576708,-117.534281244076,0.));
#446=CARTESIAN_POINT('',(149.663907349085,-115.657353870285,0.));
#447=CARTESIAN_POINT('',(150.907683509285,-113.948076123495,0.));
#448=CARTESIAN_POINT('',(152.385075957414,-112.443684412547,0.));
#449=CARTESIAN_POINT('',(154.06456366485,-111.174454752951,0.));
#450=CARTESIAN_POINT('',(155.907466984162,-110.168351857812,0.));
#451=CARTESIAN_POINT('',(157.87128000263,-109.44576427095,0.));
#452=CARTESIAN_POINT('',(159.918544249333,-109.019521435967,0.));
#453=CARTESIAN_POINT('',(161.998549811169,-108.898943960524,0.));
#454=CARTESIAN_POINT('',(164.070389592622,-109.084437242008,0.));
#455=CARTESIAN_POINT('',(166.087810202706,-109.571048298232,0.));
#456=CARTESIAN_POINT('',(168.006783754512,-110.346243699964,0.));
#457=CARTESIAN_POINT('',(169.788201632902,-111.392999631168,0.));
#458=CARTESIAN_POINT('',(171.391819551874,-112.685910067946,0.));
#459=CARTESIAN_POINT('',(172.786136632856,-114.197911494124,0.));
#460=CARTESIAN_POINT('',(173.939379396637,-115.892320767255,0.));
#461=CARTESIAN_POINT('',(174.830122383244,-117.734403130965,0.));
#462=CARTESIAN_POINT('',(175.439381287904,-119.683302690919,0.));
#463=CARTESIAN_POINT('',(175.755047773175,-121.694024493383,0.));
#464=CARTESIAN_POINT('',(175.772291851262,-123.725534897493,0.));
#465=CARTESIAN_POINT('',(175.491792477367,-125.732488309829,0.));
#466=CARTESIAN_POINT('',(174.921410510075,-127.671656862643,0.));
#467=CARTESIAN_POINT('',(174.073445352631,-129.503537923627,0.));
#468=CARTESIAN_POINT('',(172.970553214701,-131.18411173763,0.));
#469=CARTESIAN_POINT('',(171.633610646291,-132.683852065052,0.));
#470=CARTESIAN_POINT('',(170.097640695432,-133.965544457836,0.));
#471=CARTESIAN_POINT('',(168.391885592439,-135.00712910575,0.));
#472=CARTESIAN_POINT('',(166.557464229188,-135.784414141738,0.));
#473=CARTESIAN_POINT('',(164.633321670184,-136.283003064715,0.));
#474=CARTESIAN_POINT('',(162.661324910034,-136.493290372317,0.));
#475=CARTESIAN_POINT('',(160.684462995734,-136.411924356577,0.));
#476=CARTESIAN_POINT('',(158.74713340011,-136.042671435809,0.));
#477=CARTESIAN_POINT('',(156.887183661344,-135.39373128266,0.));
#478=CARTESIAN_POINT('',(155.149535948141,-134.482474910712,0.));
#479=CARTESIAN_POINT('',(153.566339646157,-133.327518695893,0.));
#480=CARTESIAN_POINT('',(152.174475033827,-131.957241635029,0.));
#481=CARTESIAN_POINT('',(151.00042362003,-130.399503499035,0.));
#482=CARTESIAN_POINT('',(150.071610977588,-128.693390048314,0.));
#483=CARTESIAN_POINT('',(149.403951651763,-126.872252779156,0.));
#484=CARTESIAN_POINT('',(149.011955142585,-124.976804644931,0.));
#485=CARTESIAN_POINT('',(148.902725151408,-123.051459167532,0.));
#486=CARTESIAN_POINT('',(149.076860571258,-121.134040260781,0.));
#487=CARTESIAN_POINT('',(149.529506464717,-119.267978132356,0.));
#488=CARTESIAN_POINT('',(150.248939392742,-117.493615532528,0.));
#489=CARTESIAN_POINT('',(151.219266957654,-115.847165186065,0.));
#490=CARTESIAN_POINT('',(152.41680548398,-114.365769331108,0.));
#491=CARTESIAN_POINT('',(153.816571895762,-113.0783715366,0.));
#492=CARTESIAN_POINT('',(155.383908481725,-112.014588797447,0.));
#493=CARTESIAN_POINT('',(157.087890448328,-111.193361633636,0.));
#494=CARTESIAN_POINT('',(158.889420329482,-110.632828949956,0.));
#495=CARTESIAN_POINT('',(160.747450553052,-110.343650233363,0.));
#496=CARTESIAN_POINT('',(162.624054676495,-110.330266049919,0.));
#497=CARTESIAN_POINT('',(164.476728209905,-110.591715582882,0.));
#498=CARTESIAN_POINT('',(166.266900939178,-111.120875199325,0.));
#499=CARTESIAN_POINT('',(167.956804126276,-111.905942018888,0.));
#500=CARTESIAN_POINT('',(169.506529284074,-112.925982616637,0.));
#501=CARTESIAN_POINT('',(170.888741116753,-114.161584376764,0.));
#502=CARTESIAN_POINT('',(172.069228432959,-115.580215417383,0.));
#503=CARTESIAN_POINT('',(173.027868387938,-117.155138992244,0.));
#504=CARTESIAN_POINT('',(173.742039811536,-118.847048238703,0.));
#505=CARTESIAN_POINT('',(174.199441349875,-120.622190709226,0.));
#506=CARTESIAN_POINT('',(174.390761676649,-122.439919457193,0.));
#507=CARTESIAN_POINT('',(174.313171262195,-124.262601160657,0.));
#508=CARTESIAN_POINT('',(173.970499076656,-126.046582545292,0.));
#509=CARTESIAN_POINT('',(173.370132260085,-127.759682678925,0.));
#510=CARTESIAN_POINT('',(172.528361536414,-129.358999113949,0.));
#511=CARTESIAN_POINT('',(171.463394790244,-130.814634400843,0.));
#512=CARTESIAN_POINT('',(170.198955892416,-132.095193775637,0.));
#513=CARTESIAN_POINT('',(168.765309388827,-133.172533443938,0.));
#514=CARTESIAN_POINT('',(167.192404495236,-134.026072912097,0.));
#515=CARTESIAN_POINT('',(165.515940099082,-134.637650742211,0.));
#516=CARTESIAN_POINT('',(163.773374372977,-134.995511353723,0.));
#517=CARTESIAN_POINT('',(162.000939147718,-135.093519790203,0.));
#518=CARTESIAN_POINT('',(160.238598426641,-134.930700291781,0.));
#519=CARTESIAN_POINT('',(158.523781294286,-134.512073519429,0.));
#520=CARTESIAN_POINT('',(156.893827252727,-133.848229313654,0.));
#521=CARTESIAN_POINT('',(155.38326593272,-132.954970297162,0.));
#522=CARTESIAN_POINT('',(154.023577351949,-131.852481431272,0.));
#523=CARTESIAN_POINT('',(152.843647304787,-130.56577254582,0.));
#524=CARTESIAN_POINT('',(151.868193319371,-129.124008674525,0.));
#525=CARTESIAN_POINT('',(151.116865938755,-127.558446350349,0.));
#526=CARTESIAN_POINT('',(150.605319763175,-125.905658779546,0.));
#527=CARTESIAN_POINT('',(150.34231901035,-124.199346439079,0.));
#528=CARTESIAN_POINT('',(150.332825655457,-122.477431049387,0.));
#529=CARTESIAN_POINT('',(150.57524483127,-120.778787286634,0.));
#530=CARTESIAN_POINT('',(151.063335119127,-119.137613273336,0.));
#531=CARTESIAN_POINT('',(151.784611295776,-117.591138663702,0.));
#532=CARTESIAN_POINT('',(152.722959746798,-116.170490875074,0.));
#533=CARTESIAN_POINT('',(153.855731838822,-114.907409483223,0.));
#534=CARTESIAN_POINT('',(155.158169078598,-113.827002589382,0.));
#535=CARTESIAN_POINT('',(156.601045364329,-112.951956301653,0.));
#536=CARTESIAN_POINT('',(158.152311038494,-112.300010134376,0.));
#537=CARTESIAN_POINT('',(159.778043259348,-111.8840962268,0.));
#538=CARTESIAN_POINT('',(161.441337122632,-111.711770812983,0.));
#539=CARTESIAN_POINT('',(163.109518086497,-111.785555506903,0.));
#540=CARTESIAN_POINT('',(164.740713910778,-112.10177340787,0.));
#541=CARTESIAN_POINT('',(166.306481057123,-112.653479112387,0.));
#542=CARTESIAN_POINT('',(167.767391845526,-113.425601448053,0.));
#543=CARTESIAN_POINT('',(169.096245597491,-114.40131652843,0.));
#544=CARTESIAN_POINT('',(170.264495362941,-115.558860007501,0.));
#545=CARTESIAN_POINT('',(171.246323060815,-116.870174989975,0.));
#546=CARTESIAN_POINT('',(172.023314066063,-118.307792911451,0.));
#547=CARTESIAN_POINT('',(172.579332299962,-119.840316314518,0.));
#548=CARTESIAN_POINT('',(172.903104508855,-121.431066509017,0.));
#549=CARTESIAN_POINT('',(172.989696560918,-123.04950707159,0.));
#550=CARTESIAN_POINT('',(172.838408499385,-124.656130345594,0.));
#551=CARTESIAN_POINT('',(172.45358942895,-126.220645453818,0.));
#552=CARTESIAN_POINT('',(171.845508384794,-127.705754103999,0.));
#553=CARTESIAN_POINT('',(171.028831767983,-129.08123141146,0.));
#554=CARTESIAN_POINT('',(170.021373522245,-130.319015076631,0.));
#555=CARTESIAN_POINT('',(168.847639932623,-131.391471989322,0.));
#556=CARTESIAN_POINT('',(167.531718658618,-132.278220571893,0.));
#557=CARTESIAN_POINT('',(166.106087167627,-132.959163459848,0.));
#558=CARTESIAN_POINT('',(164.599492084556,-133.422569357491,0.));
#559=CARTESIAN_POINT('',(163.045616118615,-133.65894071457,0.));
#560=CARTESIAN_POINT('',(161.479988054679,-133.664707339515,0.));
#561=CARTESIAN_POINT('',(159.93395897378,-133.441167907123,0.));
#562=CARTESIAN_POINT('',(158.442432312195,-132.994345871974,0.));
#563=CARTESIAN_POINT('',(157.038205866041,-132.336215730739,0.));
#564=CARTESIAN_POINT('',(155.747949827547,-131.480408831291,0.));
#565=CARTESIAN_POINT('',(154.602679555253,-130.44924327165,0.));
#566=CARTESIAN_POINT('',(153.62324003288,-129.263861546579,0.));
#567=CARTESIAN_POINT('',(152.831251036824,-127.952054107513,0.));
#568=CARTESIAN_POINT('',(152.242148100872,-126.54246541388,0.));
#569=CARTESIAN_POINT('',(151.867600600949,-125.066322024422,0.));
#570=CARTESIAN_POINT('',(151.714346506477,-123.556336204967,0.));
#571=CARTESIAN_POINT('',(151.78408429452,-122.045159465341,0.));
#572=CARTESIAN_POINT('',(152.074221303521,-120.564433028071,0.));
#573=CARTESIAN_POINT('',(152.576585707244,-119.148012798627,0.));
#574=CARTESIAN_POINT('',(153.279375304966,-117.824383819803,0.));
#575=CARTESIAN_POINT('',(154.16608323426,-116.622090606205,0.));
#576=CARTESIAN_POINT('',(155.216641952839,-115.56624408754,0.));
#577=CARTESIAN_POINT('',(156.405738702643,-114.679774471306,0.));
#578=CARTESIAN_POINT('',(157.708786514797,-113.979159426007,0.));
#579=CARTESIAN_POINT('',(159.095410255408,-113.479291241289,0.));
#580=CARTESIAN_POINT('',(160.536387937425,-113.189195359727,0.));
#581=CARTESIAN_POINT('',(161.998675507462,-113.114107957637,0.));
#582=CARTESIAN_POINT('',(163.451832250899,-113.253990252698,0.));
#583=CARTESIAN_POINT('',(164.864827666374,-113.604877892278,0.));
#584=CARTESIAN_POINT('',(166.205342470902,-114.157171110261,0.));
#585=CARTESIAN_POINT('',(167.445945514984,-114.897487348453,0.));
#586=CARTESIAN_POINT('',(168.561447300074,-115.809547646412,0.));
#587=CARTESIAN_POINT('',(169.527016424874,-116.871057184214,0.));
#588=CARTESIAN_POINT('',(170.324410421048,-118.060163772629,0.));
#589=CARTESIAN_POINT('',(170.935665549906,-119.347336265022,0.));
#590=CARTESIAN_POINT('',(171.350413019172,-120.706951305551,0.));
#591=CARTESIAN_POINT('',(171.560179759139,-122.107106192941,0.));
#592=CARTESIAN_POINT('',(171.562183386728,-123.518720553878,0.));
#593=CARTESIAN_POINT('',(171.357575083633,-124.910567241496,0.));
#594=CARTESIAN_POINT('',(170.952107843335,-126.252693866905,0.));
#595=CARTESIAN_POINT('',(170.356726734861,-127.515247791211,0.));
#596=CARTESIAN_POINT('',(169.58394891503,-128.674375495132,0.));
#597=CARTESIAN_POINT('',(168.653850092253,-129.702393999907,0.));
#598=CARTESIAN_POINT('',(167.586318533677,-130.580208685077,0.));
#599=CARTESIAN_POINT('',(166.404942930408,-131.289573921499,0.));
#600=CARTESIAN_POINT('',(165.137658992953,-131.815550728931,0.));
#601=CARTESIAN_POINT('',(163.811078776802,-132.148818032942,0.));
#602=CARTESIAN_POINT('',(162.454306237963,-132.283153729692,0.));
#603=CARTESIAN_POINT('',(161.098261704281,-132.217162613955,0.));
#604=CARTESIAN_POINT('',(159.770347351336,-131.953534650876,0.));
#605=CARTESIAN_POINT('',(158.5010116664,-131.499719306467,0.));
#606=CARTESIAN_POINT('',(157.315944779693,-130.866626504034,0.));
#607=CARTESIAN_POINT('',(156.24047770637,-130.069194816357,0.));
#608=CARTESIAN_POINT('',(155.296992712939,-129.12562269696,0.));
#609=CARTESIAN_POINT('',(154.505782789181,-128.058468371769,0.));
#610=CARTESIAN_POINT('',(153.88197794575,-126.891089911446,0.));
#611=CARTESIAN_POINT('',(153.437622549424,-125.648505134681,0.));
#612=CARTESIAN_POINT('',(153.181569365972,-124.358739801087,0.));
#613=CARTESIAN_POINT('',(153.117899590292,-123.05130365715,0.));
#614=CARTESIAN_POINT('',(153.246419225018,-121.752522548041,0.));
#615=CARTESIAN_POINT('',(153.563344113346,-120.490966939344,0.));
#616=CARTESIAN_POINT('',(154.059822516787,-119.29510428942,0.));
#617=CARTESIAN_POINT('',(154.723917480459,-118.189221994696,0.));
#618=CARTESIAN_POINT('',(155.540051530774,-117.196556557398,0.));
#619=CARTESIAN_POINT('',(156.489869037614,-116.337322554098,0.));
#620=CARTESIAN_POINT('',(157.551998806628,-115.629431333421,0.));
#621=CARTESIAN_POINT('',(158.700833438859,-115.087819957672,0.));
#622=CARTESIAN_POINT('',(159.913146584289,-114.721758809533,0.));
#623=CARTESIAN_POINT('',(161.16074539217,-114.538529014827,0.));
#624=CARTESIAN_POINT('',(162.416771026809,-114.540317112438,0.));
#625=CARTESIAN_POINT('',(163.655497692508,-114.726061980128,0.));
#626=CARTESIAN_POINT('',(164.847850405133,-115.090197779386,0.));
#627=CARTESIAN_POINT('',(165.968178700889,-115.622445753168,0.));
#628=CARTESIAN_POINT('',(166.996861280024,-116.312625370617,0.));
#629=CARTESIAN_POINT('',(167.907349522796,-117.141399546835,0.));
#630=CARTESIAN_POINT('',(168.683971074788,-118.09168182128,0.));
#631=CARTESIAN_POINT('',(169.310151323456,-119.141731219802,0.));
#632=CARTESIAN_POINT('',(169.773364140521,-120.267308602544,0.));
#633=CARTESIAN_POINT('',(170.065323124654,-121.444815730963,0.));
#634=CARTESIAN_POINT('',(170.18064508034,-122.647494405767,0.));
#635=CARTESIAN_POINT('',(170.118361934924,-123.848902712075,0.));
#636=CARTESIAN_POINT('',(169.881492491411,-125.022902857428,0.));
#637=CARTESIAN_POINT('',(169.47624579933,-126.145567485917,0.));
#638=CARTESIAN_POINT('',(168.912667076826,-127.192497335432,0.));
#639=CARTESIAN_POINT('',(168.20423103016,-128.141337173728,0.));
#640=CARTESIAN_POINT('',(167.368816426736,-128.971451604439,0.));
#641=CARTESIAN_POINT('',(166.422571621163,-129.668350583456,0.));
#642=CARTESIAN_POINT('',(165.390456894808,-130.215444692599,0.));
#643=CARTESIAN_POINT('',(164.292043643042,-130.604067777309,0.));
#644=CARTESIAN_POINT('',(163.155168374143,-130.825932123328,0.));
#645=CARTESIAN_POINT('',(162.383275347316,-130.860980323112,0.));
#646=CARTESIAN_POINT('',(162.,-130.85,0.));
#647=CARTESIAN_POINT('',(162.,-139.25,0.16));
#648=CARTESIAN_POINT('',(161.20628120964,-139.238936326906,0.159999999993763));
#649=CARTESIAN_POINT('',(160.016194749845,-139.134457472781,0.160000000023704));
#650=CARTESIAN_POINT('',(158.458674441971,-138.823019048275,0.159999999940163));
#651=CARTESIAN_POINT('',(156.930968509973,-138.397606236733,0.160000000334768));
#652=CARTESIAN_POINT('',(155.091636380898,-137.658498962568,0.159999998618187));
#653=CARTESIAN_POINT('',(153.041136009255,-136.459695644647,0.16000000484398));
#654=CARTESIAN_POINT('',(151.192899099003,-134.975761945213,0.160000005882634));
#655=CARTESIAN_POINT('',(149.584590975293,-133.239080133237,0.160000008942724));
#656=CARTESIAN_POINT('',(148.25281550808,-131.291058957086,0.160000012090376));
#657=CARTESIAN_POINT('',(147.222869974318,-129.172507883842,0.16000001584532));
#658=CARTESIAN_POINT('',(146.516226843929,-126.928983950821,0.160000020071578));
#659=CARTESIAN_POINT('',(146.147477249509,-124.612686065398,0.160000024799764));
#660=CARTESIAN_POINT('',(146.122711737593,-122.270058782317,0.160000030028308));
#661=CARTESIAN_POINT('',(146.441152141317,-119.956184237323,0.160000035750121));
#662=CARTESIAN_POINT('',(147.094397207938,-117.717854472642,0.160000041971315));
#663=CARTESIAN_POINT('',(148.067515918526,-115.603454826846,0.160000048692628));
#664=CARTESIAN_POINT('',(149.337049357845,-113.65985728198,0.160000055907922));
#665=CARTESIAN_POINT('',(150.875488241882,-111.926409120675,0.160000063624221));
#666=CARTESIAN_POINT('',(152.648014597433,-110.440755456159,0.160000071838466));
#667=CARTESIAN_POINT('',(154.614484126268,-109.234263379757,0.160000080547217));
#668=CARTESIAN_POINT('',(156.73270099596,-108.331093136435,0.160000089755502));
#669=CARTESIAN_POINT('',(158.955566736548,-107.749906270783,0.16000009946031));
#670=CARTESIAN_POINT('',(161.234952841226,-107.501687536335,0.160000109663259));
#671=CARTESIAN_POINT('',(163.52172336457,-107.59053984836,0.160000120366253));
#672=CARTESIAN_POINT('',(165.765408567735,-108.013064207132,0.160000131564584));
#673=CARTESIAN_POINT('',(167.91837486431,-108.758633042291,0.160000143261056));
#674=CARTESIAN_POINT('',(169.935133141716,-109.810481228575,0.160000155461027));
#675=CARTESIAN_POINT('',(171.770027554399,-111.142761975576,0.160000168146643));
#676=CARTESIAN_POINT('',(173.387441092081,-112.727696123649,0.160000181340129));
#677=CARTESIAN_POINT('',(174.751611276778,-114.528992926315,0.160000195031065));
#678=CARTESIAN_POINT('',(175.834185674508,-116.506575058446,0.160000209218705));
#679=CARTESIAN_POINT('',(176.612915009641,-118.616367536987,0.160000223899272));
#680=CARTESIAN_POINT('',(177.072780238207,-120.81329557476,0.160000239080449));
#681=CARTESIAN_POINT('',(177.204874821995,-123.049395093862,0.160000254761624));
#682=CARTESIAN_POINT('',(177.007930391218,-125.274799755581,0.160000270932895));
#683=CARTESIAN_POINT('',(176.487494846329,-127.44346093542,0.160000287608995));
#684=CARTESIAN_POINT('',(175.656168839798,-129.507752797628,0.160000304783049));
#685=CARTESIAN_POINT('',(174.533338085418,-131.423419235084,0.160000322454519));
#686=CARTESIAN_POINT('',(173.144987332746,-133.149436661106,0.160000340619052));
#687=CARTESIAN_POINT('',(171.520671380976,-134.650681528017,0.160000359294773));
#688=CARTESIAN_POINT('',(169.699575212145,-135.893173429231,0.160000378447693));
#689=CARTESIAN_POINT('',(167.718996316369,-136.853652135691,0.160000398110742));
#690=CARTESIAN_POINT('',(165.622858811226,-137.51158338422,0.160000418277703));
#691=CARTESIAN_POINT('',(163.459314142292,-137.85373357419,0.160000438926891));
#692=CARTESIAN_POINT('',(161.273290487514,-137.874907559788,0.160000460078175));
#693=CARTESIAN_POINT('',(159.110617607258,-137.575082650259,0.160000481748473));
#694=CARTESIAN_POINT('',(157.023488995635,-136.96358510711,0.160000503879358));
#695=CARTESIAN_POINT('',(155.049928800941,-136.052999080487,0.160000526544123));
#696=CARTESIAN_POINT('',(153.237602117229,-134.866536034049,0.16000054968023));
#697=CARTESIAN_POINT('',(151.62130157776,-133.429054486412,0.160000573333212));
#698=CARTESIAN_POINT('',(150.237783743132,-131.775055064288,0.160000597463171));
#699=CARTESIAN_POINT('',(149.113649494836,-129.938872100302,0.160000622107286));
#700=CARTESIAN_POINT('',(148.273408488021,-127.962569885563,0.160000647242086));
#701=CARTESIAN_POINT('',(147.733477308911,-125.889074923399,0.160000672874315));
#702=CARTESIAN_POINT('',(147.504194970651,-123.763118683876,0.160000699010233));
#703=CARTESIAN_POINT('',(147.589296923942,-121.631441880782,0.160000725643486));
#704=CARTESIAN_POINT('',(147.985243612117,-119.540641770774,0.160000752767122));
#705=CARTESIAN_POINT('',(148.682523576708,-117.534281244076,0.160000780401061));
#706=CARTESIAN_POINT('',(149.663907349085,-115.657353870285,0.160000808516593));
#707=CARTESIAN_POINT('',(150.907683509285,-113.948076123495,0.160000837139813));
#708=CARTESIAN_POINT('',(152.385075957414,-112.443684412547,0.160000866253279));
#709=CARTESIAN_POINT('',(154.06456366485,-111.174454752951,0.160000895884995));
#710=CARTESIAN_POINT('',(155.907466984162,-110.168351857812,0.160000926006311));
#711=CARTESIAN_POINT('',(157.87128000263,-109.44576427095,0.160000956591472));
#712=CARTESIAN_POINT('',(159.918544249333,-109.019521435967,0.160000987725936));
#713=CARTESIAN_POINT('',(161.998549811169,-108.898943960524,0.160001019315662));
#714=CARTESIAN_POINT('',(164.070389592622,-109.084437242008,0.160001051425426));
#715=CARTESIAN_POINT('',(166.087810202706,-109.571048298232,0.16000108403328));
#716=CARTESIAN_POINT('',(168.006783754512,-110.346243699964,0.160001117125992));
#717=CARTESIAN_POINT('',(169.788201632902,-111.392999631168,0.160001150739497));
#718=CARTESIAN_POINT('',(171.391819551874,-112.685910067946,0.160001184826758));
#719=CARTESIAN_POINT('',(172.786136632856,-114.197911494124,0.160001219440651));
#720=CARTESIAN_POINT('',(173.939379396637,-115.892320767255,0.160001254513384));
#721=CARTESIAN_POINT('',(174.830122383244,-117.734403130965,0.160001290106858));
#722=CARTESIAN_POINT('',(175.439381287904,-119.683302690919,0.160001326209522));
#723=CARTESIAN_POINT('',(175.755047773175,-121.694024493383,0.160001362779311));
#724=CARTESIAN_POINT('',(175.772291851262,-123.725534897493,0.160001399866049));
#725=CARTESIAN_POINT('',(175.491792477367,-125.732488309829,0.160001437445684));
#726=CARTESIAN_POINT('',(174.921410510075,-127.671656862643,0.160001475516543));
#727=CARTESIAN_POINT('',(174.073445352631,-129.503537923627,0.160001514127393));
#728=CARTESIAN_POINT('',(172.970553214701,-131.18411173763,0.160001553165235));
#729=CARTESIAN_POINT('',(171.633610646291,-132.683852065052,0.160001592776849));
#730=CARTESIAN_POINT('',(170.097640695432,-133.965544457836,0.1600016328099));
#731=CARTESIAN_POINT('',(168.391885592439,-135.00712910575,0.160001673401031));
#732=CARTESIAN_POINT('',(166.557464229188,-135.784414141738,0.160001714459614));
#733=CARTESIAN_POINT('',(164.633321670184,-136.283003064715,0.160001756020902));
#734=CARTESIAN_POINT('',(162.661324910034,-136.493290372317,0.160001798086658));
#735=CARTESIAN_POINT('',(160.684462995734,-136.411924356577,0.160001840655459));
#736=CARTESIAN_POINT('',(158.74713340011,-136.042671435809,0.160001883688897));
#737=CARTESIAN_POINT('',(156.887183661344,-135.39373128266,0.160001927276944));
#738=CARTESIAN_POINT('',(155.149535948141,-134.482474910712,0.160001971295762));
#739=CARTESIAN_POINT('',(153.566339646157,-133.327518695893,0.160002015868301));
#740=CARTESIAN_POINT('',(152.174475033827,-131.957241635029,0.160002060899663));
#741=CARTESIAN_POINT('',(151.00042362003,-130.399503499035,0.160002106483032));
#742=CARTESIAN_POINT('',(150.071610977588,-128.693390048314,0.160002152487954));
#743=CARTESIAN_POINT('',(149.403951651763,-126.872252779156,0.16000219903667));
#744=CARTESIAN_POINT('',(149.011955142585,-124.976804644931,0.160002246101578));
#745=CARTESIAN_POINT('',(148.902725151408,-123.051459167532,0.160002293608397));
#746=CARTESIAN_POINT('',(149.076860571258,-121.134040260781,0.160002341655155));
#747=CARTESIAN_POINT('',(149.529506464717,-119.267978132356,0.160002390192998));
#748=CARTESIAN_POINT('',(150.248939392742,-117.493615532528,0.160002439211364));
#749=CARTESIAN_POINT('',(151.219266957654,-115.847165186065,0.160002488761246));
#750=CARTESIAN_POINT('',(152.41680548398,-114.365769331108,0.160002538772607));
#751=CARTESIAN_POINT('',(153.816571895762,-113.0783715366,0.160002589328043));
#752=CARTESIAN_POINT('',(155.383908481725,-112.014588797447,0.160002640309008));
#753=CARTESIAN_POINT('',(157.087890448328,-111.193361633636,0.160002691845708));
#754=CARTESIAN_POINT('',(158.889420329482,-110.632828949956,0.160002743881244));
#755=CARTESIAN_POINT('',(160.747450553052,-110.343650233363,0.160002796373572));
#756=CARTESIAN_POINT('',(162.624054676495,-110.330266049919,0.160002849394294));
#757=CARTESIAN_POINT('',(164.476728209905,-110.591715582882,0.160002902890698));
#758=CARTESIAN_POINT('',(166.266900939178,-111.120875199325,0.16000295689989));
#759=CARTESIAN_POINT('',(167.956804126276,-111.905942018888,0.160003011451085));
#760=CARTESIAN_POINT('',(169.506529284074,-112.925982616637,0.160003066404273));
#761=CARTESIAN_POINT('',(170.888741116753,-114.161584376764,0.160003121961565));
#762=CARTESIAN_POINT('',(172.069228432959,-115.580215417383,0.160003177907594));
#763=CARTESIAN_POINT('',(173.027868387938,-117.155138992244,0.160003234444669));
#764=CARTESIAN_POINT('',(173.742039811536,-118.847048238703,0.160003291403547));
#765=CARTESIAN_POINT('',(174.199441349875,-120.622190709226,0.160003348907743));
#766=CARTESIAN_POINT('',(174.390761676649,-122.439919457193,0.160003406892666));
#767=CARTESIAN_POINT('',(174.313171262195,-124.262601160657,0.160003465422186));
#768=CARTESIAN_POINT('',(173.970499076656,-126.046582545292,0.160003524354735));
#769=CARTESIAN_POINT('',(173.370132260085,-127.759682678925,0.160003583900388));
#770=CARTESIAN_POINT('',(172.528361536414,-129.358999113949,0.160003643841441));
#771=CARTESIAN_POINT('',(171.463394790244,-130.814634400843,0.16000370431787));
#772=CARTESIAN_POINT('',(170.198955892416,-132.095193775637,0.160003765321193));
#773=CARTESIAN_POINT('',(168.765309388827,-133.172533443938,0.160003826772888));
#774=CARTESIAN_POINT('',(167.192404495236,-134.026072912097,0.160003888759866));
#775=CARTESIAN_POINT('',(165.515940099082,-134.637650742211,0.16000395123836));
#776=CARTESIAN_POINT('',(163.773374372977,-134.995511353723,0.160004014187562));
#777=CARTESIAN_POINT('',(162.000939147718,-135.093519790203,0.160004077672018));
#778=CARTESIAN_POINT('',(160.238598426641,-134.930700291781,0.160004141638125));
#779=CARTESIAN_POINT('',(158.523781294286,-134.512073519429,0.16000420610881));
#780=CARTESIAN_POINT('',(156.893827252727,-133.848229313654,0.160004271063607));
#781=CARTESIAN_POINT('',(155.38326593272,-132.954970297162,0.160004336508589));
#782=CARTESIAN_POINT('',(154.023577351949,-131.852481431272,0.160004402467121));
#783=CARTESIAN_POINT('',(152.843647304787,-130.56577254582,0.160004468929652));
#784=CARTESIAN_POINT('',(151.868193319371,-129.124008674525,0.160004535881198));
#785=CARTESIAN_POINT('',(151.116865938755,-127.558446350349,0.160004603355144));
#786=CARTESIAN_POINT('',(150.605319763175,-125.905658779546,0.160004671267085));
#787=CARTESIAN_POINT('',(150.34231901035,-124.199346439079,0.160004739722389));
#788=CARTESIAN_POINT('',(150.332825655457,-122.477431049387,0.16000480868904));
#789=CARTESIAN_POINT('',(150.57524483127,-120.778787286634,0.160004878102937));
#790=CARTESIAN_POINT('',(151.063335119127,-119.137613273336,0.160004948063953));
#791=CARTESIAN_POINT('',(151.784611295776,-117.591138663702,0.160005018482711));
#792=CARTESIAN_POINT('',(152.722959746798,-116.170490875074,0.160005089441795));
#793=CARTESIAN_POINT('',(153.855731838822,-114.907409483223,0.160005160852681));
#794=CARTESIAN_POINT('',(155.158169078598,-113.827002589382,0.160005232779856));
#795=CARTESIAN_POINT('',(156.601045364329,-112.951956301653,0.160005305209079));
#796=CARTESIAN_POINT('',(158.152311038494,-112.300010134376,0.16000537813801));
#797=CARTESIAN_POINT('',(159.778043259348,-111.8840962268,0.16000545157637));
#798=CARTESIAN_POINT('',(161.441337122632,-111.711770812983,0.160005525464953));
#799=CARTESIAN_POINT('',(163.109518086497,-111.785555506903,0.160005599962855));
#800=CARTESIAN_POINT('',(164.740713910778,-112.10177340787,0.160005674804393));
#801=CARTESIAN_POINT('',(166.306481057123,-112.653479112387,0.160005750299043));
#802=CARTESIAN_POINT('',(167.767391845526,-113.425601448053,0.160005826159527));
#803=CARTESIAN_POINT('',(169.096245597491,-114.40131652843,0.160005902565281));
#804=CARTESIAN_POINT('',(170.264495362941,-115.558860007501,0.160005979508742));
#805=CARTESIAN_POINT('',(171.246323060815,-116.870174989975,0.160006056874972));
#806=CARTESIAN_POINT('',(172.023314066063,-118.307792911451,0.160006134778247));
#807=CARTESIAN_POINT('',(172.579332299962,-119.840316314518,0.160006213226718));
#808=CARTESIAN_POINT('',(172.903104508855,-121.431066509017,0.160006292072017));
#809=CARTESIAN_POINT('',(172.989696560918,-123.04950707159,0.160006371525263));
#810=CARTESIAN_POINT('',(172.838408499385,-124.656130345594,0.160006451367792));
#811=CARTESIAN_POINT('',(172.45358942895,-126.220645453818,0.160006531821546));
#812=CARTESIAN_POINT('',(171.845508384794,-127.705754103999,0.160006612697106));
#813=CARTESIAN_POINT('',(171.028831767983,-129.08123141146,0.160006694055807));
#814=CARTESIAN_POINT('',(170.021373522245,-130.319015076631,0.160006775971264));
#815=CARTESIAN_POINT('',(168.847639932623,-131.391471989322,0.160006858321299));
#816=CARTESIAN_POINT('',(167.531718658618,-132.278220571893,0.160006941261132));
#817=CARTESIAN_POINT('',(166.106087167627,-132.959163459848,0.160007024590426));
#818=CARTESIAN_POINT('',(164.599492084556,-133.422569357491,0.160007108480407));
#819=CARTESIAN_POINT('',(163.045616118615,-133.65894071457,0.160007192887139));
#820=CARTESIAN_POINT('',(161.479988054679,-133.664707339515,0.160007277723104));
#821=CARTESIAN_POINT('',(159.93395897378,-133.441167907123,0.160007363127641));
#822=CARTESIAN_POINT('',(158.442432312195,-132.994345871974,0.160007449017762));
#823=CARTESIAN_POINT('',(157.038205866041,-132.336215730739,0.160007535328488));
#824=CARTESIAN_POINT('',(155.747949827547,-131.480408831291,0.160007622268249));
#825=CARTESIAN_POINT('',(154.602679555253,-130.44924327165,0.160007709572804));
#826=CARTESIAN_POINT('',(153.62324003288,-129.263861546579,0.160007797456873));
#827=CARTESIAN_POINT('',(152.831251036824,-127.952054107513,0.160007885810578));
#828=CARTESIAN_POINT('',(152.242148100872,-126.54246541388,0.160007974675935));
#829=CARTESIAN_POINT('',(151.867600600949,-125.066322024422,0.160008064040616));
#830=CARTESIAN_POINT('',(151.714346506477,-123.556336204967,0.160008153884245));
#831=CARTESIAN_POINT('',(151.78408429452,-122.045159465341,0.160008244218265));
#832=CARTESIAN_POINT('',(152.074221303521,-120.564433028071,0.160008335107461));
#833=CARTESIAN_POINT('',(152.576585707244,-119.148012798627,0.160008426423318));
#834=CARTESIAN_POINT('',(153.279375304966,-117.824383819803,0.160008518274212));
#835=CARTESIAN_POINT('',(154.16608323426,-116.622090606205,0.160008610629343));
#836=CARTESIAN_POINT('',(155.216641952839,-115.56624408754,0.160008703508508));
#837=CARTESIAN_POINT('',(156.405738702643,-114.679774471306,0.160008796794221));
#838=CARTESIAN_POINT('',(157.708786514797,-113.979159426007,0.160008890650069));
#839=CARTESIAN_POINT('',(159.095410255408,-113.479291241289,0.160008984961997));
#840=CARTESIAN_POINT('',(160.536387937425,-113.189195359727,0.160009079821139));
#841=CARTESIAN_POINT('',(161.998675507462,-113.114107957637,0.160009175123927));
#842=CARTESIAN_POINT('',(163.451832250899,-113.253990252698,0.160009270957114));
#843=CARTESIAN_POINT('',(164.864827666374,-113.604877892278,0.160009367347177));
#844=CARTESIAN_POINT('',(166.205342470902,-114.157171110261,0.160009464154043));
#845=CARTESIAN_POINT('',(167.445945514984,-114.897487348453,0.160009561438586));
#846=CARTESIAN_POINT('',(168.561447300074,-115.809547646412,0.160009659292233));
#847=CARTESIAN_POINT('',(169.527016424874,-116.871057184214,0.16000975756763));
#848=CARTESIAN_POINT('',(170.324410421048,-118.060163772629,0.16000985645221));
#849=CARTESIAN_POINT('',(170.935665549906,-119.347336265022,0.16000995569953));
#850=CARTESIAN_POINT('',(171.350413019172,-120.706951305551,0.160010055541829));
#851=CARTESIAN_POINT('',(171.560179759139,-122.107106192941,0.160010155821757));
#852=CARTESIAN_POINT('',(171.562183386728,-123.518720553878,0.160010256648328));
#853=CARTESIAN_POINT('',(171.357575083633,-124.910567241496,0.160010357974317));
#854=CARTESIAN_POINT('',(170.952107843335,-126.252693866905,0.160010459805351));
#855=CARTESIAN_POINT('',(170.356726734861,-127.515247791211,0.160010562037925));
#856=CARTESIAN_POINT('',(169.58394891503,-128.674375495132,0.160010664921522));
#857=CARTESIAN_POINT('',(168.653850092253,-129.702393999907,0.160010768159063));
#858=CARTESIAN_POINT('',(167.586318533677,-130.580208685077,0.16001087193942));
#859=CARTESIAN_POINT('',(166.404942930408,-131.289573921499,0.160010976273199));
#860=CARTESIAN_POINT('',(165.137658992953,-131.815550728931,0.160011081025645));
#861=CARTESIAN_POINT('',(163.811078776802,-132.148818032942,0.160011186317045));
#862=CARTESIAN_POINT('',(162.454306237963,-132.283153729692,0.160011292142194));
#863=CARTESIAN_POINT('',(161.098261704281,-132.217162613955,0.160011398393665));
#864=CARTESIAN_POINT('',(159.770347351336,-131.953534650876,0.160011505224397));
#865=CARTESIAN_POINT('',(158.5010116664,-131.499719306467,0.16001161247608));
#866=CARTESIAN_POINT('',(157.315944779693,-130.866626504034,0.160011720257323));
#867=CARTESIAN_POINT('',(156.24047770637,-130.069194816357,0.16001182854561));
#868=CARTESIAN_POINT('',(155.296992712939,-129.12562269696,0.160011937360845));
#869=CARTESIAN_POINT('',(154.505782789181,-128.058468371769,0.160012046589445));
#870=CARTESIAN_POINT('',(153.88197794575,-126.891089911446,0.160012156312776));
#871=CARTESIAN_POINT('',(153.437622549424,-125.648505134681,0.160012266607592));
#872=CARTESIAN_POINT('',(153.181569365972,-124.358739801087,0.160012377412484));
#873=CARTESIAN_POINT('',(153.117899590292,-123.05130365715,0.160012488621121));
#874=CARTESIAN_POINT('',(153.246419225018,-121.752522548041,0.160012600410915));
#875=CARTESIAN_POINT('',(153.563344113346,-120.490966939344,0.160012712740764));
#876=CARTESIAN_POINT('',(154.059822516787,-119.29510428942,0.160012825475359));
#877=CARTESIAN_POINT('',(154.723917480459,-118.189221994696,0.160012938705615));
#878=CARTESIAN_POINT('',(155.540051530774,-117.196556557398,0.160013052430769));
#879=CARTESIAN_POINT('',(156.489869037614,-116.337322554098,0.16001316670136));
#880=CARTESIAN_POINT('',(157.551998806628,-115.629431333421,0.16001328151283));
#881=CARTESIAN_POINT('',(158.700833438859,-115.087819957672,0.16001339668953));
#882=CARTESIAN_POINT('',(159.913146584289,-114.721758809533,0.160013512465874));
#883=CARTESIAN_POINT('',(161.16074539217,-114.538529014827,0.160013628689971));
#884=CARTESIAN_POINT('',(162.416771026809,-114.540317112438,0.160013745400831));
#885=CARTESIAN_POINT('',(163.655497692508,-114.726061980128,0.160013862739034));
#886=CARTESIAN_POINT('',(164.847850405133,-115.090197779386,0.160013980482418));
#887=CARTESIAN_POINT('',(165.968178700889,-115.622445753168,0.160014098574442));
#888=CARTESIAN_POINT('',(166.996861280024,-116.312625370617,0.160014217479682));
#889=CARTESIAN_POINT('',(167.907349522796,-117.141399546835,0.160014336620603));
#890=CARTESIAN_POINT('',(168.683971074788,-118.09168182128,0.160014456347584));
#891=CARTESIAN_POINT('',(169.310151323456,-119.141731219802,0.160014576587651));
#892=CARTESIAN_POINT('',(169.773364140521,-120.267308602544,0.160014697268546));
#893=CARTESIAN_POINT('',(170.065323124654,-121.444815730963,0.160014818531033));
#894=CARTESIAN_POINT('',(170.18064508034,-122.647494405767,0.160014940279637));
#895=CARTESIAN_POINT('',(170.118361934924,-123.848902712075,0.160015062494088));
#896=CARTESIAN_POINT('',(169.881492491411,-125.022902857428,0.160015185152345));
#897=CARTESIAN_POINT('',(169.47624579933,-126.145567485917,0.160015308385624));
#898=CARTESIAN_POINT('',(168.912667076826,-127.192497335432,0.160015432142839));
#899=CARTESIAN_POINT('',(168.20423103016,-128.141337173728,0.160015556400561));
#900=CARTESIAN_POINT('',(167.368816426736,-128.971451604439,0.160015680986834));
#901=CARTESIAN_POINT('',(166.422571621163,-129.668350583456,0.160015806319495));
#902=CARTESIAN_POINT('',(165.390456894808,-130.215444692599,0.16001593191306));
#903=CARTESIAN_POINT('',(164.292043643042,-130.604067777309,0.160016058205385));
#904=CARTESIAN_POINT('',(163.155168374143,-130.825932123328,0.160016184776824));
#905=CARTESIAN_POINT('',(162.383275347316,-130.860980323112,0.16001626989908));
#906=CARTESIAN_POINT('',(162.,-130.85,0.160016312426602));
#907=CARTESIAN_POINT('',(162.,-130.85,0.));
#908=CARTESIAN_POINT('',(161.510002422,-130.850453980597,0.));
#909=CARTESIAN_POINT('',(160.756506199041,-130.705855583619,0.));
#910=CARTESIAN_POINT('',(159.846965279078,-130.234329848762,0.));
#911=CARTESIAN_POINT('',(159.222393495473,-129.727181501607,0.));
#912=CARTESIAN_POINT('',(158.716405878601,-129.104127919788,0.));
#913=CARTESIAN_POINT('',(158.243493347309,-128.192371159267,0.));
#914=CARTESIAN_POINT('',(158.006453341984,-126.950349814647,0.));
#915=CARTESIAN_POINT('',(158.24389084313,-125.706554177015,0.));
#916=CARTESIAN_POINT('',(158.715714270387,-124.796955124877,0.));
#917=CARTESIAN_POINT('',(159.22282970679,-124.172399444749,0.));
#918=CARTESIAN_POINT('',(159.8457831802,-123.666392898521,0.));
#919=CARTESIAN_POINT('',(160.758095189739,-123.193556436559,0.));
#920=CARTESIAN_POINT('',(161.508929578691,-123.049790797953,0.));
#921=CARTESIAN_POINT('',(162.,-123.05,0.));
#922=CARTESIAN_POINT('',(162.,-130.85,0.160016312426602));
#923=CARTESIAN_POINT('',(161.510002422,-130.850453980597,0.160014864838597));
#924=CARTESIAN_POINT('',(160.756506199041,-130.705855583619,0.160012947129875));
#925=CARTESIAN_POINT('',(159.846965279078,-130.234329848762,0.160010731328032));
#926=CARTESIAN_POINT('',(159.222393495473,-129.727181501607,0.160009154649621));
#927=CARTESIAN_POINT('',(158.716405878601,-129.104127919788,0.160007701797951));
#928=CARTESIAN_POINT('',(158.243493347309,-128.192371159267,0.160005987431465));
#929=CARTESIAN_POINT('',(158.006453341984,-126.950349814647,0.160003984721792));
#930=CARTESIAN_POINT('',(158.24389084313,-125.706554177015,0.160002454351023));
#931=CARTESIAN_POINT('',(158.715714270387,-124.796955124877,0.160001568265075));
#932=CARTESIAN_POINT('',(159.22282970679,-124.172399444749,0.160000997675413));
#933=CARTESIAN_POINT('',(159.8457831802,-123.666392898521,0.160000556863956));
#934=CARTESIAN_POINT('',(160.758095189739,-123.193556436559,0.16000014300973));
#935=CARTESIAN_POINT('',(161.508929578691,-123.049790797953,0.160000001098123));
#936=CARTESIAN_POINT('',(162.,-123.05,0.16));
#937=CARTESIAN_POINT('',(162.,-139.25,0.16));
#938=CARTESIAN_POINT('',(161.20628120964,-139.238936326906,0.159999999993763));
#939=CARTESIAN_POINT('',(160.016194749845,-139.134457472781,0.160000000023704));
#940=CARTESIAN_POINT('',(158.458674441971,-138.823019048275,0.159999999940163));
#941=CARTESIAN_POINT('',(156.930968509973,-138.397606236733,0.160000000334768));
#942=CARTESIAN_POINT('',(155.091636380898,-137.658498962568,0.159999998618187));
#943=CARTESIAN_POINT('',(153.041136009255,-136.459695644647,0.16000000484398));
#944=CARTESIAN_POINT('',(151.192899099003,-134.975761945213,0.160000005882634));
#945=CARTESIAN_POINT('',(149.584590975293,-133.239080133237,0.160000008942724));
#946=CARTESIAN_POINT('',(148.25281550808,-131.291058957086,0.160000012090376));
#947=CARTESIAN_POINT('',(147.222869974318,-129.172507883842,0.16000001584532));
#948=CARTESIAN_POINT('',(146.516226843929,-126.928983950821,0.160000020071578));
#949=CARTESIAN_POINT('',(146.147477249509,-124.612686065398,0.160000024799764));
#950=CARTESIAN_POINT('',(146.122711737593,-122.270058782317,0.160000030028308));
#951=CARTESIAN_POINT('',(146.441152141317,-119.956184237323,0.160000035750121));
#952=CARTESIAN_POINT('',(147.094397207938,-117.717854472642,0.160000041971315));
#953=CARTESIAN_POINT('',(148.067515918526,-115.603454826846,0.160000048692628));
#954=CARTESIAN_POINT('',(149.337049357845,-113.65985728198,0.160000055907922));
#955=CARTESIAN_POINT('',(150.875488241882,-111.926409120675,0.160000063624221));
#956=CARTESIAN_POINT('',(152.648014597433,-110.440755456159,0.160000071838466));
#957=CARTESIAN_POINT('',(154.614484126268,-109.234263379757,0.160000080547217));
#958=CARTESIAN_POINT('',(156.73270099596,-108.331093136435,0.160000089755502));
#959=CARTESIAN_POINT('',(158.955566736548,-107.749906270783,0.16000009946031));
#960=CARTESIAN_POINT('',(161.234952841226,-107.501687536335,0.160000109663259));
#961=CARTESIAN_POINT('',(163.52172336457,-107.59053984836,0.160000120366253));
#962=CARTESIAN_POINT('',(165.765408567735,-108.013064207132,0.160000131564584));
#963=CARTESIAN_POINT('',(167.91837486431,-108.758633042291,0.160000143261056));
#964=CARTESIAN_POINT('',(169.935133141716,-109.810481228575,0.160000155461027));
#965=CARTESIAN_POINT('',(171.770027554399,-111.142761975576,0.160000168146643));
#966=CARTESIAN_POINT('',(173.387441092081,-112.727696123649,0.160000181340129));
#967=CARTESIAN_POINT('',(174.751611276778,-114.528992926315,0.160000195031065));
#968=CARTESIAN_POINT('',(175.834185674508,-116.506575058446,0.160000209218705));
#969=CARTESIAN_POINT('',(176.612915009641,-118.616367536987,0.160000223899272));
#970=CARTESIAN_POINT('',(177.072780238207,-120.81329557476,0.160000239080449));
#971=CARTESIAN_POINT('',(177.204874821995,-123.049395093862,0.160000254761624));
#972=CARTESIAN_POINT('',(177.007930391218,-125.274799755581,0.160000270932895));
#973=CARTESIAN_POINT('',(176.487494846329,-127.44346093542,0.160000287608995));
#974=CARTESIAN_POINT('',(175.656168839798,-129.507752797628,0.160000304783049));
#975=CARTESIAN_POINT('',(174.533338085418,-131.423419235084,0.160000322454519));
#976=CARTESIAN_POINT('',(173.144987332746,-133.149436661106,0.160000340619052));
#977=CARTESIAN_POINT('',(171.520671380976,-134.650681528017,0.160000359294773));
#978=CARTESIAN_POINT('',(169.699575212145,-135.893173429231,0.160000378447693));
#979=CARTESIAN_POINT('',(167.718996316369,-136.853652135691,0.160000398110742));
#980=CARTESIAN_POINT('',(165.622858811226,-137.51158338422,0.160000418277703));
#981=CARTESIAN_POINT('',(163.459314142292,-137.85373357419,0.160000438926891));
#982=CARTESIAN_POINT('',(161.273290487514,-137.874907559788,0.160000460078175));
#983=CARTESIAN_POINT('',(159.110617607258,-137.575082650259,0.160000481748473));
#984=CARTESIAN_POINT('',(157.023488995635,-136.96358510711,0.160000503879358));
#985=CARTESIAN_POINT('',(155.049928800941,-136.052999080487,0.160000526544123));
#986=CARTESIAN_POINT('',(153.237602117229,-134.866536034049,0.16000054968023));
#987=CARTESIAN_POINT('',(151.62130157776,-133.429054486412,0.160000573333212));
#988=CARTESIAN_POINT('',(150.237783743132,-131.775055064288,0.160000597463171));
#989=CARTESIAN_POINT('',(149.113649494836,-129.938872100302,0.160000622107286));
#990=CARTESIAN_POINT('',(148.273408488021,-127.962569885563,0.160000647242086));
#991=CARTESIAN_POINT('',(147.733477308911,-125.889074923399,0.160000672874315));
#992=CARTESIAN_POINT('',(147.504194970651,-123.763118683876,0.160000699010233));
#993=CARTESIAN_POINT('',(147.589296923942,-121.631441880782,0.160000725643486));
#994=CARTESIAN_POINT('',(147.985243612117,-119.540641770774,0.160000752767122));
#995=CARTESIAN_POINT('',(148.682523576708,-117.534281244076,0.160000780401061));
#996=CARTESIAN_POINT('',(149.663907349085,-115.657353870285,0.160000808516593));
#997=CARTESIAN_POINT('',(150.907683509285,-113.948076123495,0.160000837139813));
#998=CARTESIAN_POINT('',(152.385075957414,-112.443684412547,0.160000866253279));
#999=CARTESIAN_POINT('',(154.06456366485,-111.174454752951,0.160000895884995));
#1000=CARTESIAN_POINT('',(155.907466984162,-110.168351857812,0.160000926006311));
#1001=CARTESIAN_POINT('',(157.87128000263,-109.44576427095,0.160000956591472));
#1002=CARTESIAN_POINT('',(159.918544249333,-109.019521435967,0.160000987725936));
#1003=CARTESIAN_POINT('',(161.998549811169,-108.898943960524,0.160001019315662));
#1004=CARTESIAN_POINT('',(164.070389592622,-109.084437242008,0.160001051425426));
#1005=CARTESIAN_POINT('',(166.087810202706,-109.571048298232,0.16000108403328));
#1006=CARTESIAN_POINT('',(168.006783754512,-110.346243699964,0.160001117125992));
#1007=CARTESIAN_POINT('',(169.788201632902,-111.392999631168,0.160001150739497));
#1008=CARTESIAN_POINT('',(171.391819551874,-112.685910067946,0.160001184826758));
#1009=CARTESIAN_POINT('',(172.786136632856,-114.197911494124,0.160001219440651));
#1010=CARTESIAN_POINT('',(173.939379396637,-115.892320767255,0.160001254513384));
#1011=CARTESIAN_POINT('',(174.830122383244,-117.734403130965,0.160001290106858));
#1012=CARTESIAN_POINT('',(175.439381287904,-119.683302690919,0.160001326209522));
#1013=CARTESIAN_POINT('',(175.755047773175,-121.694024493383,0.160001362779311));
#1014=CARTESIAN_POINT('',(175.772291851262,-123.725534897493,0.160001399866049));
#1015=CARTESIAN_POINT('',(175.491792477367,-125.732488309829,0.160001437445684));
#1016=CARTESIAN_POINT('',(174.921410510075,-127.671656862643,0.160001475516543));
#1017=CARTESIAN_POINT('',(174.073445352631,-129.503537923627,0.160001514127393));
#1018=CARTESIAN_POINT('',(172.970553214701,-131.18411173763,0.160001553165235));
#1019=CARTESIAN_POINT('',(171.633610646291,-132.683852065052,0.160001592776849));
#1020=CARTESIAN_POINT('',(170.097640695432,-133.965544457836,0.1600016328099));
#1021=CARTESIAN_POINT('',(168.391885592439,-135.00712910575,0.160001673401031));
#1022=CARTESIAN_POINT('',(166.557464229188,-135.784414141738,0.160001714459614));
#1023=CARTESIAN_POINT('',(164.633321670184,-136.283003064715,0.160001756020902));
#1024=CARTESIAN_POINT('',(162.661324910034,-136.493290372317,0.160001798086658));
#1025=CARTESIAN_POINT('',(160.684462995734,-136.411924356577,0.160001840655459));
#1026=CARTESIAN_POINT('',(158.74713340011,-136.042671435809,0.160001883688897));
#1027=CARTESIAN_POINT('',(156.887183661344,-135.39373128266,0.160001927276944));
#1028=CARTESIAN_POINT('',(155.149535948141,-134.482474910712,0.160001971295762));
#1029=CARTESIAN_POINT('',(153.566339646157,-133.327518695893,0.160002015868301));
#1030=CARTESIAN_POINT('',(152.174475033827,-131.957241635029,0.160002060899663));
#1031=CARTESIAN_POINT('',(151.00042362003,-130.399503499035,0.160002106483032));
#1032=CARTESIAN_POINT('',(150.071610977588,-128.693390048314,0.160002152487954));
#1033=CARTESIAN_POINT('',(149.403951651763,-126.872252779156,0.16000219903667));
#1034=CARTESIAN_POINT('',(149.011955142585,-124.976804644931,0.160002246101578));
#1035=CARTESIAN_POINT('',(148.902725151408,-123.051459167532,0.160002293608397));
#1036=CARTESIAN_POINT('',(149.076860571258,-121.134040260781,0.160002341655155));
#1037=CARTESIAN_POINT('',(149.529506464717,-119.267978132356,0.160002390192998));
#1038=CARTESIAN_POINT('',(150.248939392742,-117.493615532528,0.160002439211364));
#1039=CARTESIAN_POINT('',(151.219266957654,-115.847165186065,0.160002488761246));
#1040=CARTESIAN_POINT('',(152.41680548398,-114.365769331108,0.160002538772607));
#1041=CARTESIAN_POINT('',(153.816571895762,-113.0783715366,0.160002589328043));
#1042=CARTESIAN_POINT('',(155.383908481725,-112.014588797447,0.160002640309008));
#1043=CARTESIAN_POINT('',(157.087890448328,-111.193361633636,0.160002691845708));
#1044=CARTESIAN_POINT('',(158.889420329482,-110.632828949956,0.160002743881244));
#1045=CARTESIAN_POINT('',(160.747450553052,-110.343650233363,0.160002796373572));
#1046=CARTESIAN_POINT('',(162.624054676495,-110.330266049919,0.160002849394294));
#1047=CARTESIAN_POINT('',(164.476728209905,-110.591715582882,0.160002902890698));
#1048=CARTESIAN_POINT('',(166.266900939178,-111.120875199325,0.16000295689989));
#1049=CARTESIAN_POINT('',(167.956804126276,-111.905942018888,0.160003011451085));
#1050=CARTESIAN_POINT('',(169.506529284074,-112.925982616637,0.160003066404273));
#1051=CARTESIAN_POINT('',(170.888741116753,-114.161584376764,0.160003121961565));
#1052=CARTESIAN_POINT('',(172.069228432959,-115.580215417383,0.160003177907594));
#1053=CARTESIAN_POINT('',(173.027868387938,-117.155138992244,0.160003234444669));
#1054=CARTESIAN_POINT('',(173.742039811536,-118.847048238703,0.160003291403547));
#1055=CARTESIAN_POINT('',(174.199441349875,-120.622190709226,0.160003348907743));
#1056=CARTESIAN_POINT('',(174.390761676649,-122.439919457193,0.160003406892666));
#1057=CARTESIAN_POINT('',(174.313171262195,-124.262601160657,0.160003465422186));
#1058=CARTESIAN_POINT('',(173.970499076656,-126.046582545292,0.160003524354735));
#1059=CARTESIAN_POINT('',(173.370132260085,-127.759682678925,0.160003583900388));
#1060=CARTESIAN_POINT('',(172.528361536414,-129.358999113949,0.160003643841441));
#1061=CARTESIAN_POINT('',(171.463394790244,-130.814634400843,0.16000370431787));
#1062=CARTESIAN_POINT('',(170.198955892416,-132.095193775637,0.160003765321193));
#1063=CARTESIAN_POINT('',(168.765309388827,-133.172533443938,0.160003826772888));
#1064=CARTESIAN_POINT('',(167.192404495236,-134.026072912097,0.160003888759866));
#1065=CARTESIAN_POINT('',(165.515940099082,-134.637650742211,0.16000395123836));
#1066=CARTESIAN_POINT('',(163.773374372977,-134.995511353723,0.160004014187562));
#1067=CARTESIAN_POINT('',(162.000939147718,-135.093519790203,0.160004077672018));
#1068=CARTESIAN_POINT('',(160.238598426641,-134.930700291781,0.160004141638125));
#1069=CARTESIAN_POINT('',(158.523781294286,-134.512073519429,0.16000420610881));
#1070=CARTESIAN_POINT('',(156.893827252727,-133.848229313654,0.160004271063607));
#1071=CARTESIAN_POINT('',(155.38326593272,-132.954970297162,0.160004336508589));
#1072=CARTESIAN_POINT('',(154.023577351949,-131.852481431272,0.160004402467121));
#1073=CARTESIAN_POINT('',(152.843647304787,-130.56577254582,0.160004468929652));
#1074=CARTESIAN_POINT('',(151.868193319371,-129.124008674525,0.160004535881198));
#1075=CARTESIAN_POINT('',(151.116865938755,-127.558446350349,0.160004603355144));
#1076=CARTESIAN_POINT('',(150.605319763175,-125.905658779546,0.160004671267085));
#1077=CARTESIAN_POINT('',(150.34231901035,-124.199346439079,0.160004739722389));
#1078=CARTESIAN_POINT('',(150.332825655457,-122.477431049387,0.16000480868904));
#1079=CARTESIAN_POINT('',(150.57524483127,-120.778787286634,0.160004878102937));
#1080=CARTESIAN_POINT('',(151.063335119127,-119.137613273336,0.160004948063953));
#1081=CARTESIAN_POINT('',(151.784611295776,-117.591138663702,0.160005018482711));
#1082=CARTESIAN_POINT('',(152.722959746798,-116.170490875074,0.160005089441795));
#1083=CARTESIAN_POINT('',(153.855731838822,-114.907409483223,0.160005160852681));
#1084=CARTESIAN_POINT('',(155.158169078598,-113.827002589382,0.160005232779856));
#1085=CARTESIAN_POINT('',(156.601045364329,-112.951956301653,0.160005305209079));
#1086=CARTESIAN_POINT('',(158.152311038494,-112.300010134376,0.16000537813801));
#1087=CARTESIAN_POINT('',(159.778043259348,-111.8840962268,0.16000545157637));
#1088=CARTESIAN_POINT('',(161.441337122632,-111.711770812983,0.160005525464953));
#1089=CARTESIAN_POINT('',(163.109518086497,-111.785555506903,0.160005599962855));
#1090=CARTESIAN_POINT('',(164.740713910778,-112.10177340787,0.160005674804393));
#1091=CARTESIAN_POINT('',(166.306481057123,-112.653479112387,0.160005750299043));
#1092=CARTESIAN_POINT('',(167.767391845526,-113.425601448053,0.160005826159527));
#1093=CARTESIAN_POINT('',(169.096245597491,-114.40131652843,0.160005902565281));
#1094=CARTESIAN_POINT('',(170.264495362941,-115.558860007501,0.160005979508742));
#1095=CARTESIAN_POINT('',(171.246323060815,-116.870174989975,0.160006056874972));
#1096=CARTESIAN_POINT('',(172.023314066063,-118.307792911451,0.160006134778247));
#1097=CARTESIAN_POINT('',(172.579332299962,-119.840316314518,0.160006213226718));
#1098=CARTESIAN_POINT('',(172.903104508855,-121.431066509017,0.160006292072017));
#1099=CARTESIAN_POINT('',(172.989696560918,-123.04950707159,0.160006371525263));
#1100=CARTESIAN_POINT('',(172.838408499385,-124.656130345594,0.160006451367792));
#1101=CARTESIAN_POINT('',(172.45358942895,-126.220645453818,0.160006531821546));
#1102=CARTESIAN_POINT('',(171.845508384794,-127.705754103999,0.160006612697106));
#1103=CARTESIAN_POINT('',(171.028831767983,-129.08123141146,0.160006694055807));
#1104=CARTESIAN_POINT('',(170.021373522245,-130.319015076631,0.160006775971264));
#1105=CARTESIAN_POINT('',(168.847639932623,-131.391471989322,0.160006858321299));
#1106=CARTESIAN_POINT('',(167.531718658618,-132.278220571893,0.160006941261132));
#1107=CARTESIAN_POINT('',(166.106087167627,-132.959163459848,0.160007024590426));
#1108=CARTESIAN_POINT('',(164.599492084556,-133.422569357491,0.160007108480407));
#1109=CARTESIAN_POINT('',(163.045616118615,-133.65894071457,0.160007192887139));
#1110=CARTESIAN_POINT('',(161.479988054679,-133.664707339515,0.160007277723104));
#1111=CARTESIAN_POINT('',(159.93395897378,-133.441167907123,0.160007363127641));
#1112=CARTESIAN_POINT('',(158.442432312195,-132.994345871974,0.160007449017762));
#1113=CARTESIAN_POINT('',(157.038205866041,-132.336215730739,0.160007535328488));
#1114=CARTESIAN_POINT('',(155.747949827547,-131.480408831291,0.160007622268249));
#1115=CARTESIAN_POINT('',(154.602679555253,-130.44924327165,0.160007709572804));
#1116=CARTESIAN_POINT('',(153.62324003288,-129.263861546579,0.160007797456873));
#1117=CARTESIAN_POINT('',(152.831251036824,-127.952054107513,0.160007885810578));
#1118=CARTESIAN_POINT('',(152.242148100872,-126.54246541388,0.160007974675935));
#1119=CARTESIAN_POINT('',(151.867600600949,-125.066322024422,0.160008064040616));
#1120=CARTESIAN_POINT('',(151.714346506477,-123.556336204967,0.160008153884245));
#1121=CARTESIAN_POINT('',(151.78408429452,-122.045159465341,0.160008244218265));
#1122=CARTESIAN_POINT('',(152.074221303521,-120.564433028071,0.160008335107461));
#1123=CARTESIAN_POINT('',(152.576585707244,-119.148012798627,0.160008426423318));
#1124=CARTESIAN_POINT('',(153.279375304966,-117.824383819803,0.160008518274212));
#1125=CARTESIAN_POINT('',(154.16608323426,-116.622090606205,0.160008610629343));
#1126=CARTESIAN_POINT('',(155.216641952839,-115.56624408754,0.160008703508508));
#1127=CARTESIAN_POINT('',(156.405738702643,-114.679774471306,0.160008796794221));
#1128=CARTESIAN_POINT('',(157.708786514797,-113.979159426007,0.160008890650069));
#1129=CARTESIAN_POINT('',(159.095410255408,-113.479291241289,0.160008984961997));
#1130=CARTESIAN_POINT('',(160.536387937425,-113.189195359727,0.160009079821139));
#1131=CARTESIAN_POINT('',(161.998675507462,-113.114107957637,0.160009175123927));
#1132=CARTESIAN_POINT('',(163.451832250899,-113.253990252698,0.160009270957114));
#1133=CARTESIAN_POINT('',(164.864827666374,-113.604877892278,0.160009367347177));
#1134=CARTESIAN_POINT('',(166.205342470902,-114.157171110261,0.160009464154043));
#1135=CARTESIAN_POINT('',(167.445945514984,-114.897487348453,0.160009561438586));
#1136=CARTESIAN_POINT('',(168.561447300074,-115.809547646412,0.160009659292233));
#1137=CARTESIAN_POINT('',(169.527016424874,-116.871057184214,0.16000975756763));
#1138=CARTESIAN_POINT('',(170.324410421048,-118.060163772629,0.16000985645221));
#1139=CARTESIAN_POINT('',(170.935665549906,-119.347336265022,0.16000995569953));
#1140=CARTESIAN_POINT('',(171.350413019172,-120.706951305551,0.160010055541829));
#1141=CARTESIAN_POINT('',(171.560179759139,-122.107106192941,0.160010155821757));
#1142=CARTESIAN_POINT('',(171.562183386728,-123.518720553878,0.160010256648328));
#1143=CARTESIAN_POINT('',(171.357575083633,-124.910567241496,0.160010357974317));
#1144=CARTESIAN_POINT('',(170.952107843335,-126.252693866905,0.160010459805351));
#1145=CARTESIAN_POINT('',(170.356726734861,-127.515247791211,0.160010562037925));
#1146=CARTESIAN_POINT('',(169.58394891503,-128.674375495132,0.160010664921522));
#1147=CARTESIAN_POINT('',(168.653850092253,-129.702393999907,0.160010768159063));
#1148=CARTESIAN_POINT('',(167.586318533677,-130.580208685077,0.16001087193942));
#1149=CARTESIAN_POINT('',(166.404942930408,-131.289573921499,0.160010976273199));
#1150=CARTESIAN_POINT('',(165.137658992953,-131.815550728931,0.160011081025645));
#1151=CARTESIAN_POINT('',(163.811078776802,-132.148818032942,0.160011186317045));
#1152=CARTESIAN_POINT('',(162.454306237963,-132.283153729692,0.160011292142194));
#1153=CARTESIAN_POINT('',(161.098261704281,-132.217162613955,0.160011398393665));
#1154=CARTESIAN_POINT('',(159.770347351336,-131.953534650876,0.160011505224397));
#1155=CARTESIAN_POINT('',(158.5010116664,-131.499719306467,0.16001161247608));
#1156=CARTESIAN_POINT('',(157.315944779693,-130.866626504034,0.160011720257323));
#1157=CARTESIAN_POINT('',(156.24047770637,-130.069194816357,0.16001182854561));
#1158=CARTESIAN_POINT('',(155.296992712939,-129.12562269696,0.160011937360845));
#1159=CARTESIAN_POINT('',(154.505782789181,-128.058468371769,0.160012046589445));
#1160=CARTESIAN_POINT('',(153.88197794575,-126.891089911446,0.160012156312776));
#1161=CARTESIAN_POINT('',(153.437622549424,-125.648505134681,0.160012266607592));
#1162=CARTESIAN_POINT('',(153.181569365972,-124.358739801087,0.160012377412484));
#1163=CARTESIAN_POINT('',(153.117899590292,-123.05130365715,0.160012488621121));
#1164=CARTESIAN_POINT('',(153.246419225018,-121.752522548041,0.160012600410915));
#1165=CARTESIAN_POINT('',(153.563344113346,-120.490966939344,0.160012712740764));
#1166=CARTESIAN_POINT('',(154.059822516787,-119.29510428942,0.160012825475359));
#1167=CARTESIAN_POINT('',(154.723917480459,-118.189221994696,0.160012938705615));
#1168=CARTESIAN_POINT('',(155.540051530774,-117.196556557398,0.160013052430769));
#1169=CARTESIAN_POINT('',(156.489869037614,-116.337322554098,0.16001316670136));
#1170=CARTESIAN_POINT('',(157.551998806628,-115.629431333421,0.16001328151283));
#1171=CARTESIAN_POINT('',(158.700833438859,-115.087819957672,0.16001339668953));
#1172=CARTESIAN_POINT('',(159.913146584289,-114.721758809533,0.160013512465874));
#1173=CARTESIAN_POINT('',(161.16074539217,-114.538529014827,0.160013628689971));
#1174=CARTESIAN_POINT('',(162.416771026809,-114.540317112438,0.160013745400831));
#1175=CARTESIAN_POINT('',(163.655497692508,-114.726061980128,0.160013862739034));
#1176=CARTESIAN_POINT('',(164.847850405133,-115.090197779386,0.160013980482418));
#1177=CARTESIAN_POINT('',(165.968178700889,-115.622445753168,0.160014098574442));
#1178=CARTESIAN_POINT('',(166.996861280024,-116.312625370617,0.160014217479682));
#1179=CARTESIAN_POINT('',(167.907349522796,-117.141399546835,0.160014336620603));
#1180=CARTESIAN_POINT('',(168.683971074788,-118.09168182128,0.160014456347584));
#1181=CARTESIAN_POINT('',(169.310151323456,-119.141731219802,0.160014576587651));
#1182=CARTESIAN_POINT('',(169.773364140521,-120.267308602544,0.160014697268546));
#1183=CARTESIAN_POINT('',(170.065323124654,-121.444815730963,0.160014818531033));
#1184=CARTESIAN_POINT('',(170.18064508034,-122.647494405767,0.160014940279637));
#1185=CARTESIAN_POINT('',(170.118361934924,-123.848902712075,0.160015062494088));
#1186=CARTESIAN_POINT('',(169.881492491411,-125.022902857428,0.160015185152345));
#1187=CARTESIAN_POINT('',(169.47624579933,-126.145567485917,0.160015308385624));
#1188=CARTESIAN_POINT('',(168.912667076826,-127.192497335432,0.160015432142839));
#1189=CARTESIAN_POINT('',(168.20423103016,-128.141337173728,0.160015556400561));
#1190=CARTESIAN_POINT('',(167.368816426736,-128.971451604439,0.160015680986834));
#1191=CARTESIAN_POINT('',(166.422571621163,-129.668350583456,0.160015806319495));
#1192=CARTESIAN_POINT('',(165.390456894808,-130.215444692599,0.16001593191306));
#1193=CARTESIAN_POINT('',(164.292043643042,-130.604067777309,0.160016058205385));
#1194=CARTESIAN_POINT('',(163.155168374143,-130.825932123328,0.160016184776824));
#1195=CARTESIAN_POINT('',(162.383275347316,-130.860980323112,0.16001626989908));
#1196=CARTESIAN_POINT('',(162.,-130.85,0.160016312426602));
#1197=CARTESIAN_POINT('',(162.,-138.25,0.22));
#1198=CARTESIAN_POINT('',(161.256093800753,-138.238980560157,0.219999999991424));
#1199=CARTESIAN_POINT('',(160.138104488042,-138.13981965863,0.220000000032593));
#1200=CARTESIAN_POINT('',(158.677895762533,-137.846393534278,0.219999999917724));
#1201=CARTESIAN_POINT('',(157.245508768744,-137.446144657726,0.220000000460307));
#1202=CARTESIAN_POINT('',(155.520586872203,-136.751183810633,0.219999998100007));
#1203=CARTESIAN_POINT('',(153.598487074189,-135.625059696191,0.220000006660472));
#1204=CARTESIAN_POINT('',(151.866708262255,-134.231961369766,0.220000008088622));
#1205=CARTESIAN_POINT('',(150.360236574877,-132.602196663604,0.220000012296246));
#1206=CARTESIAN_POINT('',(149.113438568196,-130.774756212837,0.220000016624268));
#1207=CARTESIAN_POINT('',(148.149917787688,-128.788007089964,0.220000021787314));
#1208=CARTESIAN_POINT('',(147.489673267491,-126.684735236932,0.220000027598419));
#1209=CARTESIAN_POINT('',(147.146222853903,-124.51387073627,0.220000034099675));
#1210=CARTESIAN_POINT('',(147.125143020994,-122.318941224846,0.220000041288924));
#1211=CARTESIAN_POINT('',(147.425569441703,-120.151542881184,0.220000049156417));
#1212=CARTESIAN_POINT('',(148.039532308748,-118.055449513335,0.220000057710558));
#1213=CARTESIAN_POINT('',(148.952894918736,-116.076060495046,0.220000066952364));
#1214=CARTESIAN_POINT('',(150.143530052059,-114.257220595948,0.220000076873393));
#1215=CARTESIAN_POINT('',(151.585566047312,-112.635669897457,0.220000087483303));
#1216=CARTESIAN_POINT('',(153.246308380654,-111.246546708335,0.220000098777891));
#1217=CARTESIAN_POINT('',(155.088103779171,-110.119099791144,0.220000110752424));
#1218=CARTESIAN_POINT('',(157.071416337491,-109.275825219373,0.220000123413816));
#1219=CARTESIAN_POINT('',(159.15210489072,-108.734091427049,0.220000136757926));
#1220=CARTESIAN_POINT('',(161.284985087252,-108.504061752917,0.220000150786982));
#1221=CARTESIAN_POINT('',(163.424112799934,-108.589404429922,0.220000165503598));
#1222=CARTESIAN_POINT('',(165.522292530144,-108.986793585735,0.220000180901303));
#1223=CARTESIAN_POINT('',(167.535020196129,-109.686156856691,0.220000196983952));
#1224=CARTESIAN_POINT('',(169.419809233662,-110.671694822343,0.220000213758912));
#1225=CARTESIAN_POINT('',(171.134057501148,-111.919155329779,0.220000231201634));
#1226=CARTESIAN_POINT('',(172.644431183928,-113.402379207271,0.220000249342677));
#1227=CARTESIAN_POINT('',(173.917633479092,-115.087330890496,0.220000268167714));
#1228=CARTESIAN_POINT('',(174.927298593579,-116.93647433933,0.22000028767572));
#1229=CARTESIAN_POINT('',(175.652773143587,-118.908570701281,0.220000307861499));
#1230=CARTESIAN_POINT('',(176.080157387154,-120.961470177326,0.220000328735617));
#1231=CARTESIAN_POINT('',(176.201258516898,-123.05037722134,0.220000350297233));
#1232=CARTESIAN_POINT('',(176.01501182256,-125.128636000278,0.22000037253273));
#1233=CARTESIAN_POINT('',(175.526765011951,-127.153186488108,0.220000395462368));
#1234=CARTESIAN_POINT('',(174.748438070145,-129.07963296194,0.220000419076692));
#1235=CARTESIAN_POINT('',(173.69826411105,-130.866725281218,0.220000443374964));
#1236=CARTESIAN_POINT('',(172.400612208453,-132.47625934247,0.220000468351196));
#1237=CARTESIAN_POINT('',(170.883159693614,-133.875549139334,0.220000494030313));
#1238=CARTESIAN_POINT('',(169.182543860088,-135.032984944207,0.220000520365578));
#1239=CARTESIAN_POINT('',(167.333760570184,-135.926905302033,0.22000054740227));
#1240=CARTESIAN_POINT('',(165.377830458025,-136.538329794199,0.220000575131841));
#1241=CARTESIAN_POINT('',(163.359701922432,-136.855069154508,0.220000603524475));
#1242=CARTESIAN_POINT('',(161.321274083765,-136.872426453705,0.22000063260749));
#1243=CARTESIAN_POINT('',(159.305273654372,-136.590521151229,0.220000662404151));
#1244=CARTESIAN_POINT('',(157.360296129238,-136.018168938915,0.220000692834118));
#1245=CARTESIAN_POINT('',(155.521862222546,-135.167255290654,0.22000072399817));
#1246=CARTESIAN_POINT('',(153.83433728766,-134.059586125314,0.220000755810317));
#1247=CARTESIAN_POINT('',(152.330032217286,-132.718445735499,0.220000788333166));
#1248=CARTESIAN_POINT('',(151.043074997811,-131.17608483178,0.22000082151186));
#1249=CARTESIAN_POINT('',(149.998124295301,-129.464564891017,0.220000855397519));
#1250=CARTESIAN_POINT('',(149.217877316767,-127.623113912577,0.220000889957868));
#1251=CARTESIAN_POINT('',(148.717514995012,-125.691773490106,0.220000925202183));
#1252=CARTESIAN_POINT('',(148.506536743483,-123.712344524063,0.220000961139071));
#1253=CARTESIAN_POINT('',(148.588236122808,-121.728313190215,0.220000997759794));
#1254=CARTESIAN_POINT('',(148.959160420449,-119.783032682008,0.220001035054792));
#1255=CARTESIAN_POINT('',(149.610314685896,-117.916992925524,0.220001073051458));
#1256=CARTESIAN_POINT('',(150.52553228759,-116.171997776014,0.220001111710315));
#1257=CARTESIAN_POINT('',(151.684524494297,-114.583508649844,0.220001151067243));
#1258=CARTESIAN_POINT('',(153.060323003581,-113.18618519465,0.220001191098258));
#1259=CARTESIAN_POINT('',(154.623496581871,-112.008043992276,0.220001231841868));
#1260=CARTESIAN_POINT('',(156.337991866042,-111.074942437799,0.220001273258678));
#1261=CARTESIAN_POINT('',(158.164236960041,-110.405683131927,0.220001315313274));
#1262=CARTESIAN_POINT('',(160.067377102703,-110.01205146561,0.220001358123162));
#1263=CARTESIAN_POINT('',(162.00029524937,-109.902561897492,0.220001401559035));
#1264=CARTESIAN_POINT('',(163.924904787918,-110.077464837277,0.22000144570996));
#1265=CARTESIAN_POINT('',(165.798182975853,-110.531976012912,0.220001490545759));
#1266=CARTESIAN_POINT('',(167.579315963404,-111.254288015704,0.220001536048239));
#1267=CARTESIAN_POINT('',(169.2320574013,-112.228448224316,0.220001582266809));
#1268=CARTESIAN_POINT('',(170.71913927828,-113.43074070792,0.220001629136792));
#1269=CARTESIAN_POINT('',(172.011422501814,-114.835940847691,0.220001676730895));
#1270=CARTESIAN_POINT('',(173.079526951293,-116.409921517092,0.220001724955902));
#1271=CARTESIAN_POINT('',(173.903621956766,-118.120247170102,0.22000177389693));
#1272=CARTESIAN_POINT('',(174.466281341235,-119.928961498981,0.220001823538092));
#1273=CARTESIAN_POINT('',(174.756440303464,-121.794286629022,0.220001873821553));
#1274=CARTESIAN_POINT('',(174.769778995905,-123.678163825632,0.220001924815818));
#1275=CARTESIAN_POINT('',(174.507084029144,-125.538552946145,0.220001976487815));
#1276=CARTESIAN_POINT('',(173.975770981959,-127.335441637607,0.220002028835247));
#1277=CARTESIAN_POINT('',(173.187413421874,-129.032139989043,0.220002081925165));
#1278=CARTESIAN_POINT('',(172.163193346127,-130.587918419009,0.220002135602198));
#1279=CARTESIAN_POINT('',(170.922581815368,-131.975532425511,0.220002190068167));
#1280=CARTESIAN_POINT('',(169.498146089898,-133.160636519496,0.220002245113612));
#1281=CARTESIAN_POINT('',(167.917053473946,-134.122926024472,0.220002300926418));
#1282=CARTESIAN_POINT('',(166.21744202022,-134.840142482178,0.22000235738197));
#1283=CARTESIAN_POINT('',(164.435440985904,-135.29907450812,0.22000241452874));
#1284=CARTESIAN_POINT('',(162.609962649764,-135.49097049889,0.220002472369154));
#1285=CARTESIAN_POINT('',(160.780769878667,-135.412925267166,0.220002530901256));
#1286=CARTESIAN_POINT('',(158.988925976304,-135.068597322652,0.220002590072234));
#1287=CARTESIAN_POINT('',(157.269394264977,-134.465725788843,0.220002650005797));
#1288=CARTESIAN_POINT('',(155.663659687324,-133.620531268163,0.220002710531673));
#1289=CARTESIAN_POINT('',(154.201358366136,-132.550328094617,0.220002771818914));
#1290=CARTESIAN_POINT('',(152.916604460629,-131.281572685918,0.220002833737036));
#1291=CARTESIAN_POINT('',(151.833730979462,-129.840144091147,0.220002896414169));
#1292=CARTESIAN_POINT('',(150.977925021754,-128.262265338773,0.220002959670937));
#1293=CARTESIAN_POINT('',(150.363736823062,-126.578812773376,0.220003023675421));
#1294=CARTESIAN_POINT('',(150.004411331286,-124.827446473506,0.22000308838967));
#1295=CARTESIAN_POINT('',(149.906351315792,-123.04917991948,0.220003153711546));
#1296=CARTESIAN_POINT('',(150.069970597748,-121.279021368989,0.220003219775838));
#1297=CARTESIAN_POINT('',(150.490588751019,-119.557120692461,0.220003286515373));
#1298=CARTESIAN_POINT('',(151.157205060274,-117.920633429936,0.220003353915626));
#1299=CARTESIAN_POINT('',(152.054996609224,-116.402902216918,0.220003422046714));
#1300=CARTESIAN_POINT('',(153.161971888738,-115.038091663772,0.220003490812334));
#1301=CARTESIAN_POINT('',(154.454972838541,-113.852789621107,0.22000356032606));
#1302=CARTESIAN_POINT('',(155.901945336115,-112.874189068001,0.220003630424886));
#1303=CARTESIAN_POINT('',(157.474165080937,-112.119693756511,0.220003701287848));
#1304=CARTESIAN_POINT('',(159.135531358839,-111.605823308871,0.22000377283671));
#1305=CARTESIAN_POINT('',(160.848168981599,-111.342221927186,0.220003845013661));
#1306=CARTESIAN_POINT('',(162.577125517401,-111.332808007849,0.220003917917154));
#1307=CARTESIAN_POINT('',(164.283251283742,-111.576523932254,0.220003991474709));
#1308=CARTESIAN_POINT('',(165.931086676664,-112.066668502415,0.220004065737349));
#1309=CARTESIAN_POINT('',(167.485782564278,-112.79218443423,0.220004140745242));
#1310=CARTESIAN_POINT('',(168.910669690094,-113.733601488656,0.220004216305875));
#1311=CARTESIAN_POINT('',(170.180708739812,-114.87291255605,0.220004292697151));
#1312=CARTESIAN_POINT('',(171.264557953874,-116.180047346399,0.220004369622942));
#1313=CARTESIAN_POINT('',(172.143841404756,-117.630316196781,0.22000444736142));
#1314=CARTESIAN_POINT('',(172.797911274155,-119.187495702467,0.220004525679876));
#1315=CARTESIAN_POINT('',(173.215582617379,-120.820470994806,0.220004604748146));
#1316=CARTESIAN_POINT('',(173.38845213864,-122.491710315576,0.220004684477416));
#1317=CARTESIAN_POINT('',(173.314127338727,-124.166644157206,0.220004764955506));
#1318=CARTESIAN_POINT('',(172.996319758251,-125.805176179257,0.22000484598776));
#1319=CARTESIAN_POINT('',(172.441979221455,-127.377793812536,0.220004927863034));
#1320=CARTESIAN_POINT('',(171.666240113447,-128.845160388797,0.220005010281981));
#1321=CARTESIAN_POINT('',(170.685934086998,-130.179924535156,0.220005093437071));
#1322=CARTESIAN_POINT('',(169.523068592763,-131.353251644862,0.220005177316641));
#1323=CARTESIAN_POINT('',(168.20556476479,-132.339473836901,0.220005261812721));
#1324=CARTESIAN_POINT('',(166.761006380795,-133.119867927822,0.220005347044816));
#1325=CARTESIAN_POINT('',(165.222218379538,-133.677947265745,0.220005432952744));
#1326=CARTESIAN_POINT('',(163.623606671492,-134.003104239575,0.220005519507898));
#1327=CARTESIAN_POINT('',(161.998390120092,-134.08987858942,0.220005606799024));
#1328=CARTESIAN_POINT('',(160.383288020233,-133.937538724602,0.220005694752422));
#1329=CARTESIAN_POINT('',(158.812654804792,-133.550895566346,0.220005783399614));
#1330=CARTESIAN_POINT('',(157.32061855531,-132.939847353266,0.220005872712459));
#1331=CARTESIAN_POINT('',(155.938725817958,-132.11904288809,0.22000596269931));
#1332=CARTESIAN_POINT('',(154.695696379275,-131.10711648371,0.220006053392291));
#1333=CARTESIAN_POINT('',(153.617853598508,-129.927094899153,0.220006144778271));
#1334=CARTESIAN_POINT('',(152.727694319888,-128.605772255261,0.220006236836647));
#1335=CARTESIAN_POINT('',(152.043122995138,-127.171974328193,0.220006329613324));
#1336=CARTESIAN_POINT('',(151.578243679649,-125.659224005456,0.220006422992242));
#1337=CARTESIAN_POINT('',(151.340884338282,-124.098390872289,0.220006517118285));
#1338=CARTESIAN_POINT('',(151.335388162373,-122.524160945015,0.22000661194743));
#1339=CARTESIAN_POINT('',(151.56010861796,-120.9720621388,0.220006707391538));
#1340=CARTESIAN_POINT('',(152.009188061494,-119.47328184024,0.220006803587935));
#1341=CARTESIAN_POINT('',(152.671010730422,-118.061897662172,0.220006900413728));
#1342=CARTESIAN_POINT('',(153.530654678299,-116.766269285085,0.220006997982468));
#1343=CARTESIAN_POINT('',(154.56727305171,-115.615242869064,0.220007096172437));
#1344=CARTESIAN_POINT('',(155.758129111386,-114.631597095139,0.220007195072302));
#1345=CARTESIAN_POINT('',(157.076438408734,-113.835880481664,0.220007294662484));
#1346=CARTESIAN_POINT('',(158.492886317193,-113.244112208844,0.220007394939764));
#1347=CARTESIAN_POINT('',(159.976442348337,-112.867941697522,0.220007495917509));
#1348=CARTESIAN_POINT('',(161.493288836528,-112.714086293032,0.22000759751431));
#1349=CARTESIAN_POINT('',(163.013657148226,-112.784624087795,0.220007699948926));
#1350=CARTESIAN_POINT('',(164.499403926661,-113.075990105265,0.22000780285604));
#1351=CARTESIAN_POINT('',(165.924669515334,-113.581679557636,0.220007906661184));
#1352=CARTESIAN_POINT('',(167.253615168784,-114.287776094898,0.22000801096935));
#1353=CARTESIAN_POINT('',(168.461582451708,-115.17883403141,0.220008116027262));
#1354=CARTESIAN_POINT('',(169.522581038521,-116.234799207481,0.22000822182452));
#1355=CARTESIAN_POINT('',(170.413290775642,-117.429981845652,0.220008328203087));
#1356=CARTESIAN_POINT('',(171.117133041949,-118.739279808936,0.220008435320089));
#1357=CARTESIAN_POINT('',(171.619618077272,-120.134052733836,0.220008543186738));
#1358=CARTESIAN_POINT('',(171.910690528197,-121.580891772494,0.220008651599024));
#1359=CARTESIAN_POINT('',(171.98604181419,-123.052040678592,0.220008760847236));
#1360=CARTESIAN_POINT('',(171.845222167292,-124.511512974977,0.220008870630714));
#1361=CARTESIAN_POINT('',(171.492401278432,-125.931740515766,0.220008981254626));
#1362=CARTESIAN_POINT('',(170.937124341003,-127.278938406527,0.220009092458521));
#1363=CARTESIAN_POINT('',(170.19289347312,-128.525756664921,0.220009204326734));
#1364=CARTESIAN_POINT('',(169.276040013254,-129.646841498334,0.220009316960488));
#1365=CARTESIAN_POINT('',(168.208944608518,-130.617258113736,0.220009430191786));
#1366=CARTESIAN_POINT('',(167.013562854931,-131.418654163931,0.220009544234057));
#1367=CARTESIAN_POINT('',(165.719582445098,-132.032906298824,0.220009658811836));
#1368=CARTESIAN_POINT('',(164.353127590169,-132.449604483207,0.22000977416056));
#1369=CARTESIAN_POINT('',(162.944778617817,-132.660352250135,0.220009890219817));
#1370=CARTESIAN_POINT('',(161.526732669803,-132.662129584053,0.220010006869268));
#1371=CARTESIAN_POINT('',(160.127373868845,-132.456310326153,0.220010124300507));
#1372=CARTESIAN_POINT('',(158.778233905914,-132.048527381667,0.220010242399423));
#1373=CARTESIAN_POINT('',(157.509050952861,-131.449841911806,0.220010361076671));
#1374=CARTESIAN_POINT('',(156.343877986949,-130.672803232512,0.220010480618843));
#1375=CARTESIAN_POINT('',(155.310615927105,-129.737782495695,0.220010600662606));
#1376=CARTESIAN_POINT('',(154.427959454121,-128.664038738626,0.2200107215032));
#1377=CARTESIAN_POINT('',(153.715277067261,-127.47681580806,0.220010842989545));
#1378=CARTESIAN_POINT('',(153.186333865318,-126.202075207289,0.22001096517941));
#1379=CARTESIAN_POINT('',(152.851505553824,-124.868116557944,0.220011088055847));
#1380=CARTESIAN_POINT('',(152.716686302418,-123.504645413065,0.220011211590837));
#1381=CARTESIAN_POINT('',(152.783163591319,-122.141114495217,0.220011335800115));
#1382=CARTESIAN_POINT('',(153.048379271322,-120.806055960717,0.220011460772759));
#1383=CARTESIAN_POINT('',(153.504749479942,-119.529945277432,0.220011586332063));
#1384=CARTESIAN_POINT('',(154.141442832108,-118.338387361079,0.220011712627041));
#1385=CARTESIAN_POINT('',(154.943428724661,-117.256991410137,0.220011839615347));
#1386=CARTESIAN_POINT('',(155.892371134606,-116.30837250087,0.220011967324199));
#1387=CARTESIAN_POINT('',(156.965302253247,-115.512994346356,0.220012095592054));
#1388=CARTESIAN_POINT('',(158.139962332039,-114.885503610372,0.220012224643844));
#1389=CARTESIAN_POINT('',(159.388919592016,-114.439095755474,0.220012354322746));
#1390=CARTESIAN_POINT('',(160.68582017601,-114.181687057582,0.220012484754066));
#1391=CARTESIAN_POINT('',(162.000939886623,-114.11777906744,0.2200126157954));
#1392=CARTESIAN_POINT('',(163.306826577791,-114.247143036641,0.220012747566031));
#1393=CARTESIAN_POINT('',(164.57554320694,-114.565969556673,0.220012880102369));
#1394=CARTESIAN_POINT('',(165.778149374236,-115.065398803336,0.220013013211809));
#1395=CARTESIAN_POINT('',(166.890109550927,-115.733207778263,0.220013146978056));
#1396=CARTESIAN_POINT('',(167.888937542184,-116.554603106601,0.22001328152682));
#1397=CARTESIAN_POINT('',(168.752501705506,-117.509417678696,0.220013416655491));
#1398=CARTESIAN_POINT('',(169.46458786198,-118.57793004259,0.220013552621789));
#1399=CARTESIAN_POINT('',(170.009206871208,-119.733411458392,0.220013689086854));
#1400=CARTESIAN_POINT('',(170.377306363531,-120.952821543656,0.220013826370015));
#1401=CARTESIAN_POINT('',(170.561528585006,-122.207514059428,0.220013964254916));
#1402=CARTESIAN_POINT('',(170.559608742975,-123.471431661331,0.220014102891451));
#1403=CARTESIAN_POINT('',(170.372802960501,-124.716624901691,0.220014242214686));
#1404=CARTESIAN_POINT('',(170.006456162447,-125.916361959694,0.220014382232358));
#1405=CARTESIAN_POINT('',(169.470603753163,-127.043890022762,0.220014522802147));
#1406=CARTESIAN_POINT('',(168.776672559065,-128.077966187357,0.220014664267092));
#1407=CARTESIAN_POINT('',(167.942809472905,-128.994010164231,0.220014806218711));
#1408=CARTESIAN_POINT('',(166.986942075924,-129.775130879485,0.220014948916702));
#1409=CARTESIAN_POINT('',(165.93027261825,-130.405218995686,0.220015092375649));
#1410=CARTESIAN_POINT('',(164.797832728855,-130.871144238723,0.220015236410261));
#1411=CARTESIAN_POINT('',(163.613467635603,-131.164769971629,0.220015381185937));
#1412=CARTESIAN_POINT('',(162.40331102434,-131.280756240587,0.220015526695517));
#1413=CARTESIAN_POINT('',(161.194912028234,-131.218130785522,0.220015672791289));
#1414=CARTESIAN_POINT('',(160.012669612113,-130.979528301977,0.220015819683546));
#1415=CARTESIAN_POINT('',(158.883639368502,-130.571819320511,0.22001596715461));
#1416=CARTESIAN_POINT('',(157.830607272894,-130.004928053184,0.220016115353819));
#1417=CARTESIAN_POINT('',(156.875986753603,-129.292320145423,0.220016264250213));
#1418=CARTESIAN_POINT('',(156.039663917597,-128.450456412315,0.220016413871161));
#1419=CARTESIAN_POINT('',(155.339477129018,-127.499578514124,0.220016564060486));
#1420=CARTESIAN_POINT('',(154.788662026523,-126.460581901977,0.220016714930067));
#1421=CARTESIAN_POINT('',(154.397695913557,-125.355790202675,0.220016866585439));
#1422=CARTESIAN_POINT('',(154.174209434544,-124.210161862264,0.220017018942166));
#1423=CARTESIAN_POINT('',(154.121594047558,-123.049893595707,0.220017171854041));
#1424=CARTESIAN_POINT('',(154.239463890333,-121.898424379538,0.220017325565007));
#1425=CARTESIAN_POINT('',(154.524191589756,-120.781133649312,0.220017480018551));
#1426=CARTESIAN_POINT('',(154.967675208124,-119.723149261022,0.220017635028618));
#1427=CARTESIAN_POINT('',(155.559114995347,-118.745878250753,0.220017790720221));
#1428=CARTESIAN_POINT('',(156.284517143214,-117.869752443721,0.220017947092307));
#1429=CARTESIAN_POINT('',(157.127464207909,-117.112499831169,0.22001810421437));
#1430=CARTESIAN_POINT('',(158.068911504292,-116.48979204404,0.220018262080142));
#1431=CARTESIAN_POINT('',(159.085960677573,-116.014697685116,0.220018420448104));
#1432=CARTESIAN_POINT('',(160.158003733968,-115.69514526708,0.220018579640577));
#1433=CARTESIAN_POINT('',(161.260071289721,-115.537309081747,0.22001873944871));
#1434=CARTESIAN_POINT('',(162.368438469801,-115.542865655436,0.220018899926142));
#1435=CARTESIAN_POINT('',(163.460413378962,-115.710635397279,0.220019061266171));
#1436=CARTESIAN_POINT('',(164.510432324594,-116.035481403098,0.220019223163324));
#1437=CARTESIAN_POINT('',(165.495848885201,-116.50807868315,0.220019385539858));
#1438=CARTESIAN_POINT('',(166.399470132583,-117.119207379754,0.220019549034563));
#1439=CARTESIAN_POINT('',(167.198101866427,-117.851610468872,0.220019712853329));
#1440=CARTESIAN_POINT('',(167.878136393236,-118.690079517114,0.220019877477928));
#1441=CARTESIAN_POINT('',(168.425202314903,-119.615338938575,0.220020042808021));
#1442=CARTESIAN_POINT('',(168.828514266583,-120.605976927546,0.22002020874425));
#1443=CARTESIAN_POINT('',(169.080995271661,-121.641150590768,0.22002037548017));
#1444=CARTESIAN_POINT('',(169.178156393372,-122.697183004518,0.220020542884501));
#1445=CARTESIAN_POINT('',(169.119442385601,-123.750884492998,0.22002071092937));
#1446=CARTESIAN_POINT('',(168.907770216509,-124.779353691622,0.220020879584475));
#1447=CARTESIAN_POINT('',(168.548832961177,-125.761686926433,0.220021049030233));
#1448=CARTESIAN_POINT('',(168.051672184028,-126.676603244028,0.220021219196404));
#1449=CARTESIAN_POINT('',(167.428280653736,-127.504672341458,0.220021390050771));
#1450=CARTESIAN_POINT('',(166.694599515369,-128.227884200604,0.220021561356897));
#1451=CARTESIAN_POINT('',(165.864940908625,-128.83377717319,0.220021733689305));
#1452=CARTESIAN_POINT('',(164.961292938082,-129.308097548337,0.220021906380458));
#1453=CARTESIAN_POINT('',(164.000827842292,-129.64351432694,0.220022080032404));
#1454=CARTESIAN_POINT('',(163.008033881745,-129.833056117806,0.220022254068133));
#1455=CARTESIAN_POINT('',(162.33454480292,-129.860851474757,0.220022371111234));
#1456=CARTESIAN_POINT('',(162.000527127788,-129.849898205534,0.220022429586578));
#1457=CARTESIAN_POINT('',(162.,-138.25,0.22));
#1458=CARTESIAN_POINT('',(161.256093800753,-138.238980560157,0.219999999991424));
#1459=CARTESIAN_POINT('',(160.138104488042,-138.13981965863,0.220000000032593));
#1460=CARTESIAN_POINT('',(158.677895762533,-137.846393534278,0.219999999917724));
#1461=CARTESIAN_POINT('',(157.245508768744,-137.446144657726,0.220000000460307));
#1462=CARTESIAN_POINT('',(155.520586872203,-136.751183810633,0.219999998100007));
#1463=CARTESIAN_POINT('',(153.598487074189,-135.625059696191,0.220000006660472));
#1464=CARTESIAN_POINT('',(151.866708262255,-134.231961369766,0.220000008088622));
#1465=CARTESIAN_POINT('',(150.360236574877,-132.602196663604,0.220000012296246));
#1466=CARTESIAN_POINT('',(149.113438568196,-130.774756212837,0.220000016624268));
#1467=CARTESIAN_POINT('',(148.149917787688,-128.788007089964,0.220000021787314));
#1468=CARTESIAN_POINT('',(147.489673267491,-126.684735236932,0.220000027598419));
#1469=CARTESIAN_POINT('',(147.146222853903,-124.51387073627,0.220000034099675));
#1470=CARTESIAN_POINT('',(147.125143020994,-122.318941224846,0.220000041288924));
#1471=CARTESIAN_POINT('',(147.425569441703,-120.151542881184,0.220000049156417));
#1472=CARTESIAN_POINT('',(148.039532308748,-118.055449513335,0.220000057710558));
#1473=CARTESIAN_POINT('',(148.952894918736,-116.076060495046,0.220000066952364));
#1474=CARTESIAN_POINT('',(150.143530052059,-114.257220595948,0.220000076873393));
#1475=CARTESIAN_POINT('',(151.585566047312,-112.635669897457,0.220000087483303));
#1476=CARTESIAN_POINT('',(153.246308380654,-111.246546708335,0.220000098777891));
#1477=CARTESIAN_POINT('',(155.088103779171,-110.119099791144,0.220000110752424));
#1478=CARTESIAN_POINT('',(157.071416337491,-109.275825219373,0.220000123413816));
#1479=CARTESIAN_POINT('',(159.15210489072,-108.734091427049,0.220000136757926));
#1480=CARTESIAN_POINT('',(161.284985087252,-108.504061752917,0.220000150786982));
#1481=CARTESIAN_POINT('',(163.424112799934,-108.589404429922,0.220000165503598));
#1482=CARTESIAN_POINT('',(165.522292530144,-108.986793585735,0.220000180901303));
#1483=CARTESIAN_POINT('',(167.535020196129,-109.686156856691,0.220000196983952));
#1484=CARTESIAN_POINT('',(169.419809233662,-110.671694822343,0.220000213758912));
#1485=CARTESIAN_POINT('',(171.134057501148,-111.919155329779,0.220000231201634));
#1486=CARTESIAN_POINT('',(172.644431183928,-113.402379207271,0.220000249342677));
#1487=CARTESIAN_POINT('',(173.917633479092,-115.087330890496,0.220000268167714));
#1488=CARTESIAN_POINT('',(174.927298593579,-116.93647433933,0.22000028767572));
#1489=CARTESIAN_POINT('',(175.652773143587,-118.908570701281,0.220000307861499));
#1490=CARTESIAN_POINT('',(176.080157387154,-120.961470177326,0.220000328735617));
#1491=CARTESIAN_POINT('',(176.201258516898,-123.05037722134,0.220000350297233));
#1492=CARTESIAN_POINT('',(176.01501182256,-125.128636000278,0.22000037253273));
#1493=CARTESIAN_POINT('',(175.526765011951,-127.153186488108,0.220000395462368));
#1494=CARTESIAN_POINT('',(174.748438070145,-129.07963296194,0.220000419076692));
#1495=CARTESIAN_POINT('',(173.69826411105,-130.866725281218,0.220000443374964));
#1496=CARTESIAN_POINT('',(172.400612208453,-132.47625934247,0.220000468351196));
#1497=CARTESIAN_POINT('',(170.883159693614,-133.875549139334,0.220000494030313));
#1498=CARTESIAN_POINT('',(169.182543860088,-135.032984944207,0.220000520365578));
#1499=CARTESIAN_POINT('',(167.333760570184,-135.926905302033,0.22000054740227));
#1500=CARTESIAN_POINT('',(165.377830458025,-136.538329794199,0.220000575131841));
#1501=CARTESIAN_POINT('',(163.359701922432,-136.855069154508,0.220000603524475));
#1502=CARTESIAN_POINT('',(161.321274083765,-136.872426453705,0.22000063260749));
#1503=CARTESIAN_POINT('',(159.305273654372,-136.590521151229,0.220000662404151));
#1504=CARTESIAN_POINT('',(157.360296129238,-136.018168938915,0.220000692834118));
#1505=CARTESIAN_POINT('',(155.521862222546,-135.167255290654,0.22000072399817));
#1506=CARTESIAN_POINT('',(153.83433728766,-134.059586125314,0.220000755810317));
#1507=CARTESIAN_POINT('',(152.330032217286,-132.718445735499,0.220000788333166));
#1508=CARTESIAN_POINT('',(151.043074997811,-131.17608483178,0.22000082151186));
#1509=CARTESIAN_POINT('',(149.998124295301,-129.464564891017,0.220000855397519));
#1510=CARTESIAN_POINT('',(149.217877316767,-127.623113912577,0.220000889957868));
#1511=CARTESIAN_POINT('',(148.717514995012,-125.691773490106,0.220000925202183));
#1512=CARTESIAN_POINT('',(148.506536743483,-123.712344524063,0.220000961139071));
#1513=CARTESIAN_POINT('',(148.588236122808,-121.728313190215,0.220000997759794));
#1514=CARTESIAN_POINT('',(148.959160420449,-119.783032682008,0.220001035054792));
#1515=CARTESIAN_POINT('',(149.610314685896,-117.916992925524,0.220001073051458));
#1516=CARTESIAN_POINT('',(150.52553228759,-116.171997776014,0.220001111710315));
#1517=CARTESIAN_POINT('',(151.684524494297,-114.583508649844,0.220001151067243));
#1518=CARTESIAN_POINT('',(153.060323003581,-113.18618519465,0.220001191098258));
#1519=CARTESIAN_POINT('',(154.623496581871,-112.008043992276,0.220001231841868));
#1520=CARTESIAN_POINT('',(156.337991866042,-111.074942437799,0.220001273258678));
#1521=CARTESIAN_POINT('',(158.164236960041,-110.405683131927,0.220001315313274));
#1522=CARTESIAN_POINT('',(160.067377102703,-110.01205146561,0.220001358123162));
#1523=CARTESIAN_POINT('',(162.00029524937,-109.902561897492,0.220001401559035));
#1524=CARTESIAN_POINT('',(163.924904787918,-110.077464837277,0.22000144570996));
#1525=CARTESIAN_POINT('',(165.798182975853,-110.531976012912,0.220001490545759));
#1526=CARTESIAN_POINT('',(167.579315963404,-111.254288015704,0.220001536048239));
#1527=CARTESIAN_POINT('',(169.2320574013,-112.228448224316,0.220001582266809));
#1528=CARTESIAN_POINT('',(170.71913927828,-113.43074070792,0.220001629136792));
#1529=CARTESIAN_POINT('',(172.011422501814,-114.835940847691,0.220001676730895));
#1530=CARTESIAN_POINT('',(173.079526951293,-116.409921517092,0.220001724955902));
#1531=CARTESIAN_POINT('',(173.903621956766,-118.120247170102,0.22000177389693));
#1532=CARTESIAN_POINT('',(174.466281341235,-119.928961498981,0.220001823538092));
#1533=CARTESIAN_POINT('',(174.756440303464,-121.794286629022,0.220001873821553));
#1534=CARTESIAN_POINT('',(174.769778995905,-123.678163825632,0.220001924815818));
#1535=CARTESIAN_POINT('',(174.507084029144,-125.538552946145,0.220001976487815));
#1536=CARTESIAN_POINT('',(173.975770981959,-127.335441637607,0.220002028835247));
#1537=CARTESIAN_POINT('',(173.187413421874,-129.032139989043,0.220002081925165));
#1538=CARTESIAN_POINT('',(172.163193346127,-130.587918419009,0.220002135602198));
#1539=CARTESIAN_POINT('',(170.922581815368,-131.975532425511,0.220002190068167));
#1540=CARTESIAN_POINT('',(169.498146089898,-133.160636519496,0.220002245113612));
#1541=CARTESIAN_POINT('',(167.917053473946,-134.122926024472,0.220002300926418));
#1542=CARTESIAN_POINT('',(166.21744202022,-134.840142482178,0.22000235738197));
#1543=CARTESIAN_POINT('',(164.435440985904,-135.29907450812,0.22000241452874));
#1544=CARTESIAN_POINT('',(162.609962649764,-135.49097049889,0.220002472369154));
#1545=CARTESIAN_POINT('',(160.780769878667,-135.412925267166,0.220002530901256));
#1546=CARTESIAN_POINT('',(158.988925976304,-135.068597322652,0.220002590072234));
#1547=CARTESIAN_POINT('',(157.269394264977,-134.465725788843,0.220002650005797));
#1548=CARTESIAN_POINT('',(155.663659687324,-133.620531268163,0.220002710531673));
#1549=CARTESIAN_POINT('',(154.201358366136,-132.550328094617,0.220002771818914));
#1550=CARTESIAN_POINT('',(152.916604460629,-131.281572685918,0.220002833737036));
#1551=CARTESIAN_POINT('',(151.833730979462,-129.840144091147,0.220002896414169));
#1552=CARTESIAN_POINT('',(150.977925021754,-128.262265338773,0.220002959670937));
#1553=CARTESIAN_POINT('',(150.363736823062,-126.578812773376,0.220003023675421));
#1554=CARTESIAN_POINT('',(150.004411331286,-124.827446473506,0.22000308838967));
#1555=CARTESIAN_POINT('',(149.906351315792,-123.04917991948,0.220003153711546));
#1556=CARTESIAN_POINT('',(150.069970597748,-121.279021368989,0.220003219775838));
#1557=CARTESIAN_POINT('',(150.490588751019,-119.557120692461,0.220003286515373));
#1558=CARTESIAN_POINT('',(151.157205060274,-117.920633429936,0.220003353915626));
#1559=CARTESIAN_POINT('',(152.054996609224,-116.402902216918,0.220003422046714));
#1560=CARTESIAN_POINT('',(153.161971888738,-115.038091663772,0.220003490812334));
#1561=CARTESIAN_POINT('',(154.454972838541,-113.852789621107,0.22000356032606));
#1562=CARTESIAN_POINT('',(155.901945336115,-112.874189068001,0.220003630424886));
#1563=CARTESIAN_POINT('',(157.474165080937,-112.119693756511,0.220003701287848));
#1564=CARTESIAN_POINT('',(159.135531358839,-111.605823308871,0.22000377283671));
#1565=CARTESIAN_POINT('',(160.848168981599,-111.342221927186,0.220003845013661));
#1566=CARTESIAN_POINT('',(162.577125517401,-111.332808007849,0.220003917917154));
#1567=CARTESIAN_POINT('',(164.283251283742,-111.576523932254,0.220003991474709));
#1568=CARTESIAN_POINT('',(165.931086676664,-112.066668502415,0.220004065737349));
#1569=CARTESIAN_POINT('',(167.485782564278,-112.79218443423,0.220004140745242));
#1570=CARTESIAN_POINT('',(168.910669690094,-113.733601488656,0.220004216305875));
#1571=CARTESIAN_POINT('',(170.180708739812,-114.87291255605,0.220004292697151));
#1572=CARTESIAN_POINT('',(171.264557953874,-116.180047346399,0.220004369622942));
#1573=CARTESIAN_POINT('',(172.143841404756,-117.630316196781,0.22000444736142));
#1574=CARTESIAN_POINT('',(172.797911274155,-119.187495702467,0.220004525679876));
#1575=CARTESIAN_POINT('',(173.215582617379,-120.820470994806,0.220004604748146));
#1576=CARTESIAN_POINT('',(173.38845213864,-122.491710315576,0.220004684477416));
#1577=CARTESIAN_POINT('',(173.314127338727,-124.166644157206,0.220004764955506));
#1578=CARTESIAN_POINT('',(172.996319758251,-125.805176179257,0.22000484598776));
#1579=CARTESIAN_POINT('',(172.441979221455,-127.377793812536,0.220004927863034));
#1580=CARTESIAN_POINT('',(171.666240113447,-128.845160388797,0.220005010281981));
#1581=CARTESIAN_POINT('',(170.685934086998,-130.179924535156,0.220005093437071));
#1582=CARTESIAN_POINT('',(169.523068592763,-131.353251644862,0.220005177316641));
#1583=CARTESIAN_POINT('',(168.20556476479,-132.339473836901,0.220005261812721));
#1584=CARTESIAN_POINT('',(166.761006380795,-133.119867927822,0.220005347044816));
#1585=CARTESIAN_POINT('',(165.222218379538,-133.677947265745,0.220005432952744));
#1586=CARTESIAN_POINT('',(163.623606671492,-134.003104239575,0.220005519507898));
#1587=CARTESIAN_POINT('',(161.998390120092,-134.08987858942,0.220005606799024));
#1588=CARTESIAN_POINT('',(160.383288020233,-133.937538724602,0.220005694752422));
#1589=CARTESIAN_POINT('',(158.812654804792,-133.550895566346,0.220005783399614));
#1590=CARTESIAN_POINT('',(157.32061855531,-132.939847353266,0.220005872712459));
#1591=CARTESIAN_POINT('',(155.938725817958,-132.11904288809,0.22000596269931));
#1592=CARTESIAN_POINT('',(154.695696379275,-131.10711648371,0.220006053392291));
#1593=CARTESIAN_POINT('',(153.617853598508,-129.927094899153,0.220006144778271));
#1594=CARTESIAN_POINT('',(152.727694319888,-128.605772255261,0.220006236836647));
#1595=CARTESIAN_POINT('',(152.043122995138,-127.171974328193,0.220006329613324));
#1596=CARTESIAN_POINT('',(151.578243679649,-125.659224005456,0.220006422992242));
#1597=CARTESIAN_POINT('',(151.340884338282,-124.098390872289,0.220006517118285));
#1598=CARTESIAN_POINT('',(151.335388162373,-122.524160945015,0.22000661194743));
#1599=CARTESIAN_POINT('',(151.56010861796,-120.9720621388,0.220006707391538));
#1600=CARTESIAN_POINT('',(152.009188061494,-119.47328184024,0.220006803587935));
#1601=CARTESIAN_POINT('',(152.671010730422,-118.061897662172,0.220006900413728));
#1602=CARTESIAN_POINT('',(153.530654678299,-116.766269285085,0.220006997982468));
#1603=CARTESIAN_POINT('',(154.56727305171,-115.615242869064,0.220007096172437));
#1604=CARTESIAN_POINT('',(155.758129111386,-114.631597095139,0.220007195072302));
#1605=CARTESIAN_POINT('',(157.076438408734,-113.835880481664,0.220007294662484));
#1606=CARTESIAN_POINT('',(158.492886317193,-113.244112208844,0.220007394939764));
#1607=CARTESIAN_POINT('',(159.976442348337,-112.867941697522,0.220007495917509));
#1608=CARTESIAN_POINT('',(161.493288836528,-112.714086293032,0.22000759751431));
#1609=CARTESIAN_POINT('',(163.013657148226,-112.784624087795,0.220007699948926));
#1610=CARTESIAN_POINT('',(164.499403926661,-113.075990105265,0.22000780285604));
#1611=CARTESIAN_POINT('',(165.924669515334,-113.581679557636,0.220007906661184));
#1612=CARTESIAN_POINT('',(167.253615168784,-114.287776094898,0.22000801096935));
#1613=CARTESIAN_POINT('',(168.461582451708,-115.17883403141,0.220008116027262));
#1614=CARTESIAN_POINT('',(169.522581038521,-116.234799207481,0.22000822182452));
#1615=CARTESIAN_POINT('',(170.413290775642,-117.429981845652,0.220008328203087));
#1616=CARTESIAN_POINT('',(171.117133041949,-118.739279808936,0.220008435320089));
#1617=CARTESIAN_POINT('',(171.619618077272,-120.134052733836,0.220008543186738));
#1618=CARTESIAN_POINT('',(171.910690528197,-121.580891772494,0.220008651599024));
#1619=CARTESIAN_POINT('',(171.98604181419,-123.052040678592,0.220008760847236));
#1620=CARTESIAN_POINT('',(171.845222167292,-124.511512974977,0.220008870630714));
#1621=CARTESIAN_POINT('',(171.492401278432,-125.931740515766,0.220008981254626));
#1622=CARTESIAN_POINT('',(170.937124341003,-127.278938406527,0.220009092458521));
#1623=CARTESIAN_POINT('',(170.19289347312,-128.525756664921,0.220009204326734));
#1624=CARTESIAN_POINT('',(169.276040013254,-129.646841498334,0.220009316960488));
#1625=CARTESIAN_POINT('',(168.208944608518,-130.617258113736,0.220009430191786));
#1626=CARTESIAN_POINT('',(167.013562854931,-131.418654163931,0.220009544234057));
#1627=CARTESIAN_POINT('',(165.719582445098,-132.032906298824,0.220009658811836));
#1628=CARTESIAN_POINT('',(164.353127590169,-132.449604483207,0.22000977416056));
#1629=CARTESIAN_POINT('',(162.944778617817,-132.660352250135,0.220009890219817));
#1630=CARTESIAN_POINT('',(161.526732669803,-132.662129584053,0.220010006869268));
#1631=CARTESIAN_POINT('',(160.127373868845,-132.456310326153,0.220010124300507));
#1632=CARTESIAN_POINT('',(158.778233905914,-132.048527381667,0.220010242399423));
#1633=CARTESIAN_POINT('',(157.509050952861,-131.449841911806,0.220010361076671));
#1634=CARTESIAN_POINT('',(156.343877986949,-130.672803232512,0.220010480618843));
#1635=CARTESIAN_POINT('',(155.310615927105,-129.737782495695,0.220010600662606));
#1636=CARTESIAN_POINT('',(154.427959454121,-128.664038738626,0.2200107215032));
#1637=CARTESIAN_POINT('',(153.715277067261,-127.47681580806,0.220010842989545));
#1638=CARTESIAN_POINT('',(153.186333865318,-126.202075207289,0.22001096517941));
#1639=CARTESIAN_POINT('',(152.851505553824,-124.868116557944,0.220011088055847));
#1640=CARTESIAN_POINT('',(152.716686302418,-123.504645413065,0.220011211590837));
#1641=CARTESIAN_POINT('',(152.783163591319,-122.141114495217,0.220011335800115));
#1642=CARTESIAN_POINT('',(153.048379271322,-120.806055960717,0.220011460772759));
#1643=CARTESIAN_POINT('',(153.504749479942,-119.529945277432,0.220011586332063));
#1644=CARTESIAN_POINT('',(154.141442832108,-118.338387361079,0.220011712627041));
#1645=CARTESIAN_POINT('',(154.943428724661,-117.256991410137,0.220011839615347));
#1646=CARTESIAN_POINT('',(155.892371134606,-116.30837250087,0.220011967324199));
#1647=CARTESIAN_POINT('',(156.965302253247,-115.512994346356,0.220012095592054));
#1648=CARTESIAN_POINT('',(158.139962332039,-114.885503610372,0.220012224643844));
#1649=CARTESIAN_POINT('',(159.388919592016,-114.439095755474,0.220012354322746));
#1650=CARTESIAN_POINT('',(160.68582017601,-114.181687057582,0.220012484754066));
#1651=CARTESIAN_POINT('',(162.000939886623,-114.11777906744,0.2200126157954));
#1652=CARTESIAN_POINT('',(163.306826577791,-114.247143036641,0.220012747566031));
#1653=CARTESIAN_POINT('',(164.57554320694,-114.565969556673,0.220012880102369));
#1654=CARTESIAN_POINT('',(165.778149374236,-115.065398803336,0.220013013211809));
#1655=CARTESIAN_POINT('',(166.890109550927,-115.733207778263,0.220013146978056));
#1656=CARTESIAN_POINT('',(167.888937542184,-116.554603106601,0.22001328152682));
#1657=CARTESIAN_POINT('',(168.752501705506,-117.509417678696,0.220013416655491));
#1658=CARTESIAN_POINT('',(169.46458786198,-118.57793004259,0.220013552621789));
#1659=CARTESIAN_POINT('',(170.009206871208,-119.733411458392,0.220013689086854));
#1660=CARTESIAN_POINT('',(170.377306363531,-120.952821543656,0.220013826370015));
#1661=CARTESIAN_POINT('',(170.561528585006,-122.207514059428,0.220013964254916));
#1662=CARTESIAN_POINT('',(170.559608742975,-123.471431661331,0.220014102891451));
#1663=CARTESIAN_POINT('',(170.372802960501,-124.716624901691,0.220014242214686));
#1664=CARTESIAN_POINT('',(170.006456162447,-125.916361959694,0.220014382232358));
#1665=CARTESIAN_POINT('',(169.470603753163,-127.043890022762,0.220014522802147));
#1666=CARTESIAN_POINT('',(168.776672559065,-128.077966187357,0.220014664267092));
#1667=CARTESIAN_POINT('',(167.942809472905,-128.994010164231,0.220014806218711));
#1668=CARTESIAN_POINT('',(166.986942075924,-129.775130879485,0.220014948916702));
#1669=CARTESIAN_POINT('',(165.93027261825,-130.405218995686,0.220015092375649));
#1670=CARTESIAN_POINT('',(164.797832728855,-130.871144238723,0.220015236410261));
#1671=CARTESIAN_POINT('',(163.613467635603,-131.164769971629,0.220015381185937));
#1672=CARTESIAN_POINT('',(162.40331102434,-131.280756240587,0.220015526695517));
#1673=CARTESIAN_POINT('',(161.194912028234,-131.218130785522,0.220015672791289));
#1674=CARTESIAN_POINT('',(160.012669612113,-130.979528301977,0.220015819683546));
#1675=CARTESIAN_POINT('',(158.883639368502,-130.571819320511,0.22001596715461));
#1676=CARTESIAN_POINT('',(157.830607272894,-130.004928053184,0.220016115353819));
#1677=CARTESIAN_POINT('',(156.875986753603,-129.292320145423,0.220016264250213));
#1678=CARTESIAN_POINT('',(156.039663917597,-128.450456412315,0.220016413871161));
#1679=CARTESIAN_POINT('',(155.339477129018,-127.499578514124,0.220016564060486));
#1680=CARTESIAN_POINT('',(154.788662026523,-126.460581901977,0.220016714930067));
#1681=CARTESIAN_POINT('',(154.397695913557,-125.355790202675,0.220016866585439));
#1682=CARTESIAN_POINT('',(154.174209434544,-124.210161862264,0.220017018942166));
#1683=CARTESIAN_POINT('',(154.121594047558,-123.049893595707,0.220017171854041));
#1684=CARTESIAN_POINT('',(154.239463890333,-121.898424379538,0.220017325565007));
#1685=CARTESIAN_POINT('',(154.524191589756,-120.781133649312,0.220017480018551));
#1686=CARTESIAN_POINT('',(154.967675208124,-119.723149261022,0.220017635028618));
#1687=CARTESIAN_POINT('',(155.559114995347,-118.745878250753,0.220017790720221));
#1688=CARTESIAN_POINT('',(156.284517143214,-117.869752443721,0.220017947092307));
#1689=CARTESIAN_POINT('',(157.127464207909,-117.112499831169,0.22001810421437));
#1690=CARTESIAN_POINT('',(158.068911504292,-116.48979204404,0.220018262080142));
#1691=CARTESIAN_POINT('',(159.085960677573,-116.014697685116,0.220018420448104));
#1692=CARTESIAN_POINT('',(160.158003733968,-115.69514526708,0.220018579640577));
#1693=CARTESIAN_POINT('',(161.260071289721,-115.537309081747,0.22001873944871));
#1694=CARTESIAN_POINT('',(162.368438469801,-115.542865655436,0.220018899926142));
#1695=CARTESIAN_POINT('',(163.460413378962,-115.710635397279,0.220019061266171));
#1696=CARTESIAN_POINT('',(164.510432324594,-116.035481403098,0.220019223163324));
#1697=CARTESIAN_POINT('',(165.495848885201,-116.50807868315,0.220019385539858));
#1698=CARTESIAN_POINT('',(166.399470132583,-117.119207379754,0.220019549034563));
#1699=CARTESIAN_POINT('',(167.198101866427,-117.851610468872,0.220019712853329));
#1700=CARTESIAN_POINT('',(167.878136393236,-118.690079517114,0.220019877477928));
#1701=CARTESIAN_POINT('',(168.425202314903,-119.615338938575,0.220020042808021));
#1702=CARTESIAN_POINT('',(168.828514266583,-120.605976927546,0.22002020874425));
#1703=CARTESIAN_POINT('',(169.080995271661,-121.641150590768,0.22002037548017));
#1704=CARTESIAN_POINT('',(169.178156393372,-122.697183004518,0.220020542884501));
#1705=CARTESIAN_POINT('',(169.119442385601,-123.750884492998,0.22002071092937));
#1706=CARTESIAN_POINT('',(168.907770216509,-124.779353691622,0.220020879584475));
#1707=CARTESIAN_POINT('',(168.548832961177,-125.761686926433,0.220021049030233));
#1708=CARTESIAN_POINT('',(168.051672184028,-126.676603244028,0.220021219196404));
#1709=CARTESIAN_POINT('',(167.428280653736,-127.504672341458,0.220021390050771));
#1710=CARTESIAN_POINT('',(166.694599515369,-128.227884200604,0.220021561356897));
#1711=CARTESIAN_POINT('',(165.864940908625,-128.83377717319,0.220021733689305));
#1712=CARTESIAN_POINT('',(164.961292938082,-129.308097548337,0.220021906380458));
#1713=CARTESIAN_POINT('',(164.000827842292,-129.64351432694,0.220022080032404));
#1714=CARTESIAN_POINT('',(163.008033881745,-129.833056117806,0.220022254068133));
#1715=CARTESIAN_POINT('',(162.33454480292,-129.860851474757,0.220022371111234));
#1716=CARTESIAN_POINT('',(162.000527127788,-129.849898205534,0.220022429586578));
#1717=CARTESIAN_POINT('',(162.,-138.25,0.));
#1718=CARTESIAN_POINT('',(161.256093800753,-138.238980560157,0.));
#1719=CARTESIAN_POINT('',(160.138104488042,-138.13981965863,0.));
#1720=CARTESIAN_POINT('',(158.677895762533,-137.846393534278,0.));
#1721=CARTESIAN_POINT('',(157.245508768744,-137.446144657726,0.));
#1722=CARTESIAN_POINT('',(155.520586872203,-136.751183810633,0.));
#1723=CARTESIAN_POINT('',(153.598487074189,-135.625059696191,0.));
#1724=CARTESIAN_POINT('',(151.866708262255,-134.231961369766,0.));
#1725=CARTESIAN_POINT('',(150.360236574877,-132.602196663604,0.));
#1726=CARTESIAN_POINT('',(149.113438568196,-130.774756212837,0.));
#1727=CARTESIAN_POINT('',(148.149917787688,-128.788007089964,0.));
#1728=CARTESIAN_POINT('',(147.489673267491,-126.684735236932,0.));
#1729=CARTESIAN_POINT('',(147.146222853903,-124.51387073627,0.));
#1730=CARTESIAN_POINT('',(147.125143020994,-122.318941224846,0.));
#1731=CARTESIAN_POINT('',(147.425569441703,-120.151542881184,0.));
#1732=CARTESIAN_POINT('',(148.039532308748,-118.055449513335,0.));
#1733=CARTESIAN_POINT('',(148.952894918736,-116.076060495046,0.));
#1734=CARTESIAN_POINT('',(150.143530052059,-114.257220595948,0.));
#1735=CARTESIAN_POINT('',(151.585566047312,-112.635669897457,0.));
#1736=CARTESIAN_POINT('',(153.246308380654,-111.246546708335,0.));
#1737=CARTESIAN_POINT('',(155.088103779171,-110.119099791144,0.));
#1738=CARTESIAN_POINT('',(157.071416337491,-109.275825219373,0.));
#1739=CARTESIAN_POINT('',(159.15210489072,-108.734091427049,0.));
#1740=CARTESIAN_POINT('',(161.284985087252,-108.504061752917,0.));
#1741=CARTESIAN_POINT('',(163.424112799934,-108.589404429922,0.));
#1742=CARTESIAN_POINT('',(165.522292530144,-108.986793585735,0.));
#1743=CARTESIAN_POINT('',(167.535020196129,-109.686156856691,0.));
#1744=CARTESIAN_POINT('',(169.419809233662,-110.671694822343,0.));
#1745=CARTESIAN_POINT('',(171.134057501148,-111.919155329779,0.));
#1746=CARTESIAN_POINT('',(172.644431183928,-113.402379207271,0.));
#1747=CARTESIAN_POINT('',(173.917633479092,-115.087330890496,0.));
#1748=CARTESIAN_POINT('',(174.927298593579,-116.93647433933,0.));
#1749=CARTESIAN_POINT('',(175.652773143587,-118.908570701281,0.));
#1750=CARTESIAN_POINT('',(176.080157387154,-120.961470177326,0.));
#1751=CARTESIAN_POINT('',(176.201258516898,-123.05037722134,0.));
#1752=CARTESIAN_POINT('',(176.01501182256,-125.128636000278,0.));
#1753=CARTESIAN_POINT('',(175.526765011951,-127.153186488108,0.));
#1754=CARTESIAN_POINT('',(174.748438070145,-129.07963296194,0.));
#1755=CARTESIAN_POINT('',(173.69826411105,-130.866725281218,0.));
#1756=CARTESIAN_POINT('',(172.400612208453,-132.47625934247,0.));
#1757=CARTESIAN_POINT('',(170.883159693614,-133.875549139334,0.));
#1758=CARTESIAN_POINT('',(169.182543860088,-135.032984944207,0.));
#1759=CARTESIAN_POINT('',(167.333760570184,-135.926905302033,0.));
#1760=CARTESIAN_POINT('',(165.377830458025,-136.538329794199,0.));
#1761=CARTESIAN_POINT('',(163.359701922432,-136.855069154508,0.));
#1762=CARTESIAN_POINT('',(161.321274083765,-136.872426453705,0.));
#1763=CARTESIAN_POINT('',(159.305273654372,-136.590521151229,0.));
#1764=CARTESIAN_POINT('',(157.360296129238,-136.018168938915,0.));
#1765=CARTESIAN_POINT('',(155.521862222546,-135.167255290654,0.));
#1766=CARTESIAN_POINT('',(153.83433728766,-134.059586125314,0.));
#1767=CARTESIAN_POINT('',(152.330032217286,-132.718445735499,0.));
#1768=CARTESIAN_POINT('',(151.043074997811,-131.17608483178,0.));
#1769=CARTESIAN_POINT('',(149.998124295301,-129.464564891017,0.));
#1770=CARTESIAN_POINT('',(149.217877316767,-127.623113912577,0.));
#1771=CARTESIAN_POINT('',(148.717514995012,-125.691773490106,0.));
#1772=CARTESIAN_POINT('',(148.506536743483,-123.712344524063,0.));
#1773=CARTESIAN_POINT('',(148.588236122808,-121.728313190215,0.));
#1774=CARTESIAN_POINT('',(148.959160420449,-119.783032682008,0.));
#1775=CARTESIAN_POINT('',(149.610314685896,-117.916992925524,0.));
#1776=CARTESIAN_POINT('',(150.52553228759,-116.171997776014,0.));
#1777=CARTESIAN_POINT('',(151.684524494297,-114.583508649844,0.));
#1778=CARTESIAN_POINT('',(153.060323003581,-113.18618519465,0.));
#1779=CARTESIAN_POINT('',(154.623496581871,-112.008043992276,0.));
#1780=CARTESIAN_POINT('',(156.337991866042,-111.074942437799,0.));
#1781=CARTESIAN_POINT('',(158.164236960041,-110.405683131927,0.));
#1782=CARTESIAN_POINT('',(160.067377102703,-110.01205146561,0.));
#1783=CARTESIAN_POINT('',(162.00029524937,-109.902561897492,0.));
#1784=CARTESIAN_POINT('',(163.924904787918,-110.077464837277,0.));
#1785=CARTESIAN_POINT('',(165.798182975853,-110.531976012912,0.));
#1786=CARTESIAN_POINT('',(167.579315963404,-111.254288015704,0.));
#1787=CARTESIAN_POINT('',(169.2320574013,-112.228448224316,0.));
#1788=CARTESIAN_POINT('',(170.71913927828,-113.43074070792,0.));
#1789=CARTESIAN_POINT('',(172.011422501814,-114.835940847691,0.));
#1790=CARTESIAN_POINT('',(173.079526951293,-116.409921517092,0.));
#1791=CARTESIAN_POINT('',(173.903621956766,-118.120247170102,0.));
#1792=CARTESIAN_POINT('',(174.466281341235,-119.928961498981,0.));
#1793=CARTESIAN_POINT('',(174.756440303464,-121.794286629022,0.));
#1794=CARTESIAN_POINT('',(174.769778995905,-123.678163825632,0.));
#1795=CARTESIAN_POINT('',(174.507084029144,-125.538552946145,0.));
#1796=CARTESIAN_POINT('',(173.975770981959,-127.335441637607,0.));
#1797=CARTESIAN_POINT('',(173.187413421874,-129.032139989043,0.));
#1798=CARTESIAN_POINT('',(172.163193346127,-130.587918419009,0.));
#1799=CARTESIAN_POINT('',(170.922581815368,-131.975532425511,0.));
#1800=CARTESIAN_POINT('',(169.498146089898,-133.160636519496,0.));
#1801=CARTESIAN_POINT('',(167.917053473946,-134.122926024472,0.));
#1802=CARTESIAN_POINT('',(166.21744202022,-134.840142482178,0.));
#1803=CARTESIAN_POINT('',(164.435440985904,-135.29907450812,0.));
#1804=CARTESIAN_POINT('',(162.609962649764,-135.49097049889,0.));
#1805=CARTESIAN_POINT('',(160.780769878667,-135.412925267166,0.));
#1806=CARTESIAN_POINT('',(158.988925976304,-135.068597322652,0.));
#1807=CARTESIAN_POINT('',(157.269394264977,-134.465725788843,0.));
#1808=CARTESIAN_POINT('',(155.663659687324,-133.620531268163,0.));
#1809=CARTESIAN_POINT('',(154.201358366136,-132.550328094617,0.));
#1810=CARTESIAN_POINT('',(152.916604460629,-131.281572685918,0.));
#1811=CARTESIAN_POINT('',(151.833730979462,-129.840144091147,0.));
#1812=CARTESIAN_POINT('',(150.977925021754,-128.262265338773,0.));
#1813=CARTESIAN_POINT('',(150.363736823062,-126.578812773376,0.));
#1814=CARTESIAN_POINT('',(150.004411331286,-124.827446473506,0.));
#1815=CARTESIAN_POINT('',(149.906351315792,-123.04917991948,0.));
#1816=CARTESIAN_POINT('',(150.069970597748,-121.279021368989,0.));
#1817=CARTESIAN_POINT('',(150.490588751019,-119.557120692461,0.));
#1818=CARTESIAN_POINT('',(151.157205060274,-117.920633429936,0.));
#1819=CARTESIAN_POINT('',(152.054996609224,-116.402902216918,0.));
#1820=CARTESIAN_POINT('',(153.161971888738,-115.038091663772,0.));
#1821=CARTESIAN_POINT('',(154.454972838541,-113.852789621107,0.));
#1822=CARTESIAN_POINT('',(155.901945336115,-112.874189068001,0.));
#1823=CARTESIAN_POINT('',(157.474165080937,-112.119693756511,0.));
#1824=CARTESIAN_POINT('',(159.135531358839,-111.605823308871,0.));
#1825=CARTESIAN_POINT('',(160.848168981599,-111.342221927186,0.));
#1826=CARTESIAN_POINT('',(162.577125517401,-111.332808007849,0.));
#1827=CARTESIAN_POINT('',(164.283251283742,-111.576523932254,0.));
#1828=CARTESIAN_POINT('',(165.931086676664,-112.066668502415,0.));
#1829=CARTESIAN_POINT('',(167.485782564278,-112.79218443423,0.));
#1830=CARTESIAN_POINT('',(168.910669690094,-113.733601488656,0.));
#1831=CARTESIAN_POINT('',(170.180708739812,-114.87291255605,0.));
#1832=CARTESIAN_POINT('',(171.264557953874,-116.180047346399,0.));
#1833=CARTESIAN_POINT('',(172.143841404756,-117.630316196781,0.));
#1834=CARTESIAN_POINT('',(172.797911274155,-119.187495702467,0.));
#1835=CARTESIAN_POINT('',(173.215582617379,-120.820470994806,0.));
#1836=CARTESIAN_POINT('',(173.38845213864,-122.491710315576,0.));
#1837=CARTESIAN_POINT('',(173.314127338727,-124.166644157206,0.));
#1838=CARTESIAN_POINT('',(172.996319758251,-125.805176179257,0.));
#1839=CARTESIAN_POINT('',(172.441979221455,-127.377793812536,0.));
#1840=CARTESIAN_POINT('',(171.666240113447,-128.845160388797,0.));
#1841=CARTESIAN_POINT('',(170.685934086998,-130.179924535156,0.));
#1842=CARTESIAN_POINT('',(169.523068592763,-131.353251644862,0.));
#1843=CARTESIAN_POINT('',(168.20556476479,-132.339473836901,0.));
#1844=CARTESIAN_POINT('',(166.761006380795,-133.119867927822,0.));
#1845=CARTESIAN_POINT('',(165.222218379538,-133.677947265745,0.));
#1846=CARTESIAN_POINT('',(163.623606671492,-134.003104239575,0.));
#1847=CARTESIAN_POINT('',(161.998390120092,-134.08987858942,0.));
#1848=CARTESIAN_POINT('',(160.383288020233,-133.937538724602,0.));
#1849=CARTESIAN_POINT('',(158.812654804792,-133.550895566346,0.));
#1850=CARTESIAN_POINT('',(157.32061855531,-132.939847353266,0.));
#1851=CARTESIAN_POINT('',(155.938725817958,-132.11904288809,0.));
#1852=CARTESIAN_POINT('',(154.695696379275,-131.10711648371,0.));
#1853=CARTESIAN_POINT('',(153.617853598508,-129.927094899153,0.));
#1854=CARTESIAN_POINT('',(152.727694319888,-128.605772255261,0.));
#1855=CARTESIAN_POINT('',(152.043122995138,-127.171974328193,0.));
#1856=CARTESIAN_POINT('',(151.578243679649,-125.659224005456,0.));
#1857=CARTESIAN_POINT('',(151.340884338282,-124.098390872289,0.));
#1858=CARTESIAN_POINT('',(151.335388162373,-122.524160945015,0.));
#1859=CARTESIAN_POINT('',(151.56010861796,-120.9720621388,0.));
#1860=CARTESIAN_POINT('',(152.009188061494,-119.47328184024,0.));
#1861=CARTESIAN_POINT('',(152.671010730422,-118.061897662172,0.));
#1862=CARTESIAN_POINT('',(153.530654678299,-116.766269285085,0.));
#1863=CARTESIAN_POINT('',(154.56727305171,-115.615242869064,0.));
#1864=CARTESIAN_POINT('',(155.758129111386,-114.631597095139,0.));
#1865=CARTESIAN_POINT('',(157.076438408734,-113.835880481664,0.));
#1866=CARTESIAN_POINT('',(158.492886317193,-113.244112208844,0.));
#1867=CARTESIAN_POINT('',(159.976442348337,-112.867941697522,0.));
#1868=CARTESIAN_POINT('',(161.493288836528,-112.714086293032,0.));
#1869=CARTESIAN_POINT('',(163.013657148226,-112.784624087795,0.));
#1870=CARTESIAN_POINT('',(164.499403926661,-113.075990105265,0.));
#1871=CARTESIAN_POINT('',(165.924669515334,-113.581679557636,0.));
#1872=CARTESIAN_POINT('',(167.253615168784,-114.287776094898,0.));
#1873=CARTESIAN_POINT('',(168.461582451708,-115.17883403141,0.));
#1874=CARTESIAN_POINT('',(169.522581038521,-116.234799207481,0.));
#1875=CARTESIAN_POINT('',(170.413290775642,-117.429981845652,0.));
#1876=CARTESIAN_POINT('',(171.117133041949,-118.739279808936,0.));
#1877=CARTESIAN_POINT('',(171.619618077272,-120.134052733836,0.));
#1878=CARTESIAN_POINT('',(171.910690528197,-121.580891772494,0.));
#1879=CARTESIAN_POINT('',(171.98604181419,-123.052040678592,0.));
#1880=CARTESIAN_POINT('',(171.845222167292,-124.511512974977,0.));
#1881=CARTESIAN_POINT('',(171.492401278432,-125.931740515766,0.));
#1882=CARTESIAN_POINT('',(170.937124341003,-127.278938406527,0.));
#1883=CARTESIAN_POINT('',(170.19289347312,-128.525756664921,0.));
#1884=CARTESIAN_POINT('',(169.276040013254,-129.646841498334,0.));
#1885=CARTESIAN_POINT('',(168.208944608518,-130.617258113736,0.));
#1886=CARTESIAN_POINT('',(167.013562854931,-131.418654163931,0.));
#1887=CARTESIAN_POINT('',(165.719582445098,-132.032906298824,0.));
#1888=CARTESIAN_POINT('',(164.353127590169,-132.449604483207,0.));
#1889=CARTESIAN_POINT('',(162.944778617817,-132.660352250135,0.));
#1890=CARTESIAN_POINT('',(161.526732669803,-132.662129584053,0.));
#1891=CARTESIAN_POINT('',(160.127373868845,-132.456310326153,0.));
#1892=CARTESIAN_POINT('',(158.778233905914,-132.048527381667,0.));
#1893=CARTESIAN_POINT('',(157.509050952861,-131.449841911806,0.));
#1894=CARTESIAN_POINT('',(156.343877986949,-130.672803232512,0.));
#1895=CARTESIAN_POINT('',(155.310615927105,-129.737782495695,0.));
#1896=CARTESIAN_POINT('',(154.427959454121,-128.664038738626,0.));
#1897=CARTESIAN_POINT('',(153.715277067261,-127.47681580806,0.));
#1898=CARTESIAN_POINT('',(153.186333865318,-126.202075207289,0.));
#1899=CARTESIAN_POINT('',(152.851505553824,-124.868116557944,0.));
#1900=CARTESIAN_POINT('',(152.716686302418,-123.504645413065,0.));
#1901=CARTESIAN_POINT('',(152.783163591319,-122.141114495217,0.));
#1902=CARTESIAN_POINT('',(153.048379271322,-120.806055960717,0.));
#1903=CARTESIAN_POINT('',(153.504749479942,-119.529945277432,0.));
#1904=CARTESIAN_POINT('',(154.141442832108,-118.338387361079,0.));
#1905=CARTESIAN_POINT('',(154.943428724661,-117.256991410137,0.));
#1906=CARTESIAN_POINT('',(155.892371134606,-116.30837250087,0.));
#1907=CARTESIAN_POINT('',(156.965302253247,-115.512994346356,0.));
#1908=CARTESIAN_POINT('',(158.139962332039,-114.885503610372,0.));
#1909=CARTESIAN_POINT('',(159.388919592016,-114.439095755474,0.));
#1910=CARTESIAN_POINT('',(160.68582017601,-114.181687057582,0.));
#1911=CARTESIAN_POINT('',(162.000939886623,-114.11777906744,0.));
#1912=CARTESIAN_POINT('',(163.306826577791,-114.247143036641,0.));
#1913=CARTESIAN_POINT('',(164.57554320694,-114.565969556673,0.));
#1914=CARTESIAN_POINT('',(165.778149374236,-115.065398803336,0.));
#1915=CARTESIAN_POINT('',(166.890109550927,-115.733207778263,0.));
#1916=CARTESIAN_POINT('',(167.888937542184,-116.554603106601,0.));
#1917=CARTESIAN_POINT('',(168.752501705506,-117.509417678696,0.));
#1918=CARTESIAN_POINT('',(169.46458786198,-118.57793004259,0.));
#1919=CARTESIAN_POINT('',(170.009206871208,-119.733411458392,0.));
#1920=CARTESIAN_POINT('',(170.377306363531,-120.952821543656,0.));
#1921=CARTESIAN_POINT('',(170.561528585006,-122.207514059428,0.));
#1922=CARTESIAN_POINT('',(170.559608742975,-123.471431661331,0.));
#1923=CARTESIAN_POINT('',(170.372802960501,-124.716624901691,0.));
#1924=CARTESIAN_POINT('',(170.006456162447,-125.916361959694,0.));
#1925=CARTESIAN_POINT('',(169.470603753163,-127.043890022762,0.));
#1926=CARTESIAN_POINT('',(168.776672559065,-128.077966187357,0.));
#1927=CARTESIAN_POINT('',(167.942809472905,-128.994010164231,0.));
#1928=CARTESIAN_POINT('',(166.986942075924,-129.775130879485,0.));
#1929=CARTESIAN_POINT('',(165.93027261825,-130.405218995686,0.));
#1930=CARTESIAN_POINT('',(164.797832728855,-130.871144238723,0.));
#1931=CARTESIAN_POINT('',(163.613467635603,-131.164769971629,0.));
#1932=CARTESIAN_POINT('',(162.40331102434,-131.280756240587,0.));
#1933=CARTESIAN_POINT('',(161.194912028234,-131.218130785522,0.));
#1934=CARTESIAN_POINT('',(160.012669612113,-130.979528301977,0.));
#1935=CARTESIAN_POINT('',(158.883639368502,-130.571819320511,0.));
#1936=CARTESIAN_POINT('',(157.830607272894,-130.004928053184,0.));
#1937=CARTESIAN_POINT('',(156.875986753603,-129.292320145423,0.));
#1938=CARTESIAN_POINT('',(156.039663917597,-128.450456412315,0.));
#1939=CARTESIAN_POINT('',(155.339477129018,-127.499578514124,0.));
#1940=CARTESIAN_POINT('',(154.788662026523,-126.460581901977,0.));
#1941=CARTESIAN_POINT('',(154.397695913557,-125.355790202675,0.));
#1942=CARTESIAN_POINT('',(154.174209434544,-124.210161862264,0.));
#1943=CARTESIAN_POINT('',(154.121594047558,-123.049893595707,0.));
#1944=CARTESIAN_POINT('',(154.239463890333,-121.898424379538,0.));
#1945=CARTESIAN_POINT('',(154.524191589756,-120.781133649312,0.));
#1946=CARTESIAN_POINT('',(154.967675208124,-119.723149261022,0.));
#1947=CARTESIAN_POINT('',(155.559114995347,-118.745878250753,0.));
#1948=CARTESIAN_POINT('',(156.284517143214,-117.869752443721,0.));
#1949=CARTESIAN_POINT('',(157.127464207909,-117.112499831169,0.));
#1950=CARTESIAN_POINT('',(158.068911504292,-116.48979204404,0.));
#1951=CARTESIAN_POINT('',(159.085960677573,-116.014697685116,0.));
#1952=CARTESIAN_POINT('',(160.158003733968,-115.69514526708,0.));
#1953=CARTESIAN_POINT('',(161.260071289721,-115.537309081747,0.));
#1954=CARTESIAN_POINT('',(162.368438469801,-115.542865655436,0.));
#1955=CARTESIAN_POINT('',(163.460413378962,-115.710635397279,0.));
#1956=CARTESIAN_POINT('',(164.510432324594,-116.035481403098,0.));
#1957=CARTESIAN_POINT('',(165.495848885201,-116.50807868315,0.));
#1958=CARTESIAN_POINT('',(166.399470132583,-117.119207379754,0.));
#1959=CARTESIAN_POINT('',(167.198101866427,-117.851610468872,0.));
#1960=CARTESIAN_POINT('',(167.878136393236,-118.690079517114,0.));
#1961=CARTESIAN_POINT('',(168.425202314903,-119.615338938575,0.));
#1962=CARTESIAN_POINT('',(168.828514266583,-120.605976927546,0.));
#1963=CARTESIAN_POINT('',(169.080995271661,-121.641150590768,0.));
#1964=CARTESIAN_POINT('',(169.178156393372,-122.697183004518,0.));
#1965=CARTESIAN_POINT('',(169.119442385601,-123.750884492998,0.));
#1966=CARTESIAN_POINT('',(168.907770216509,-124.779353691622,0.));
#1967=CARTESIAN_POINT('',(168.548832961177,-125.761686926433,0.));
#1968=CARTESIAN_POINT('',(168.051672184028,-126.676603244028,0.));
#1969=CARTESIAN_POINT('',(167.428280653736,-127.504672341458,0.));
#1970=CARTESIAN_POINT('',(166.694599515369,-128.227884200604,0.));
#1971=CARTESIAN_POINT('',(165.864940908625,-128.83377717319,0.));
#1972=CARTESIAN_POINT('',(164.961292938082,-129.308097548337,0.));
#1973=CARTESIAN_POINT('',(164.000827842292,-129.64351432694,0.));
#1974=CARTESIAN_POINT('',(163.008033881745,-129.833056117806,0.));
#1975=CARTESIAN_POINT('',(162.33454480292,-129.860851474757,0.));
#1976=CARTESIAN_POINT('',(162.000527127788,-129.849898205534,0.));
#1977=CARTESIAN_POINT('',(162.,-138.25,0.));
#1978=CARTESIAN_POINT('',(161.256093800753,-138.238980560157,0.));
#1979=CARTESIAN_POINT('',(160.138104488042,-138.13981965863,0.));
#1980=CARTESIAN_POINT('',(158.677895762533,-137.846393534278,0.));
#1981=CARTESIAN_POINT('',(157.245508768744,-137.446144657726,0.));
#1982=CARTESIAN_POINT('',(155.520586872203,-136.751183810633,0.));
#1983=CARTESIAN_POINT('',(153.598487074189,-135.625059696191,0.));
#1984=CARTESIAN_POINT('',(151.866708262255,-134.231961369766,0.));
#1985=CARTESIAN_POINT('',(150.360236574877,-132.602196663604,0.));
#1986=CARTESIAN_POINT('',(149.113438568196,-130.774756212837,0.));
#1987=CARTESIAN_POINT('',(148.149917787688,-128.788007089964,0.));
#1988=CARTESIAN_POINT('',(147.489673267491,-126.684735236932,0.));
#1989=CARTESIAN_POINT('',(147.146222853903,-124.51387073627,0.));
#1990=CARTESIAN_POINT('',(147.125143020994,-122.318941224846,0.));
#1991=CARTESIAN_POINT('',(147.425569441703,-120.151542881184,0.));
#1992=CARTESIAN_POINT('',(148.039532308748,-118.055449513335,0.));
#1993=CARTESIAN_POINT('',(148.952894918736,-116.076060495046,0.));
#1994=CARTESIAN_POINT('',(150.143530052059,-114.257220595948,0.));
#1995=CARTESIAN_POINT('',(151.585566047312,-112.635669897457,0.));
#1996=CARTESIAN_POINT('',(153.246308380654,-111.246546708335,0.));
#1997=CARTESIAN_POINT('',(155.088103779171,-110.119099791144,0.));
#1998=CARTESIAN_POINT('',(157.071416337491,-109.275825219373,0.));
#1999=CARTESIAN_POINT('',(159.15210489072,-108.734091427049,0.));
#2000=CARTESIAN_POINT('',(161.284985087252,-108.504061752917,0.));
#2001=CARTESIAN_POINT('',(163.424112799934,-108.589404429922,0.));
#2002=CARTESIAN_POINT('',(165.522292530144,-108.986793585735,0.));
#2003=CARTESIAN_POINT('',(167.535020196129,-109.686156856691,0.));
#2004=CARTESIAN_POINT('',(169.419809233662,-110.671694822343,0.));
#2005=CARTESIAN_POINT('',(171.134057501148,-111.919155329779,0.));
#2006=CARTESIAN_POINT('',(172.644431183928,-113.402379207271,0.));
#2007=CARTESIAN_POINT('',(173.917633479092,-115.087330890496,0.));
#2008=CARTESIAN_POINT('',(174.927298593579,-116.93647433933,0.));
#2009=CARTESIAN_POINT('',(175.652773143587,-118.908570701281,0.));
#2010=CARTESIAN_POINT('',(176.080157387154,-120.961470177326,0.));
#2011=CARTESIAN_POINT('',(176.201258516898,-123.05037722134,0.));
#2012=CARTESIAN_POINT('',(176.01501182256,-125.128636000278,0.));
#2013=CARTESIAN_POINT('',(175.526765011951,-127.153186488108,0.));
#2014=CARTESIAN_POINT('',(174.748438070145,-129.07963296194,0.));
#2015=CARTESIAN_POINT('',(173.69826411105,-130.866725281218,0.));
#2016=CARTESIAN_POINT('',(172.400612208453,-132.47625934247,0.));
#2017=CARTESIAN_POINT('',(170.883159693614,-133.875549139334,0.));
#2018=CARTESIAN_POINT('',(169.182543860088,-135.032984944207,0.));
#2019=CARTESIAN_POINT('',(167.333760570184,-135.926905302033,0.));
#2020=CARTESIAN_POINT('',(165.377830458025,-136.538329794199,0.));
#2021=CARTESIAN_POINT('',(163.359701922432,-136.855069154508,0.));
#2022=CARTESIAN_POINT('',(161.321274083765,-136.872426453705,0.));
#2023=CARTESIAN_POINT('',(159.305273654372,-136.590521151229,0.));
#2024=CARTESIAN_POINT('',(157.360296129238,-136.018168938915,0.));
#2025=CARTESIAN_POINT('',(155.521862222546,-135.167255290654,0.));
#2026=CARTESIAN_POINT('',(153.83433728766,-134.059586125314,0.));
#2027=CARTESIAN_POINT('',(152.330032217286,-132.718445735499,0.));
#2028=CARTESIAN_POINT('',(151.043074997811,-131.17608483178,0.));
#2029=CARTESIAN_POINT('',(149.998124295301,-129.464564891017,0.));
#2030=CARTESIAN_POINT('',(149.217877316767,-127.623113912577,0.));
#2031=CARTESIAN_POINT('',(148.717514995012,-125.691773490106,0.));
#2032=CARTESIAN_POINT('',(148.506536743483,-123.712344524063,0.));
#2033=CARTESIAN_POINT('',(148.588236122808,-121.728313190215,0.));
#2034=CARTESIAN_POINT('',(148.959160420449,-119.783032682008,0.));
#2035=CARTESIAN_POINT('',(149.610314685896,-117.916992925524,0.));
#2036=CARTESIAN_POINT('',(150.52553228759,-116.171997776014,0.));
#2037=CARTESIAN_POINT('',(151.684524494297,-114.583508649844,0.));
#2038=CARTESIAN_POINT('',(153.060323003581,-113.18618519465,0.));
#2039=CARTESIAN_POINT('',(154.623496581871,-112.008043992276,0.));
#2040=CARTESIAN_POINT('',(156.337991866042,-111.074942437799,0.));
#2041=CARTESIAN_POINT('',(158.164236960041,-110.405683131927,0.));
#2042=CARTESIAN_POINT('',(160.067377102703,-110.01205146561,0.));
#2043=CARTESIAN_POINT('',(162.00029524937,-109.902561897492,0.));
#2044=CARTESIAN_POINT('',(163.924904787918,-110.077464837277,0.));
#2045=CARTESIAN_POINT('',(165.798182975853,-110.531976012912,0.));
#2046=CARTESIAN_POINT('',(167.579315963404,-111.254288015704,0.));
#2047=CARTESIAN_POINT('',(169.2320574013,-112.228448224316,0.));
#2048=CARTESIAN_POINT('',(170.71913927828,-113.43074070792,0.));
#2049=CARTESIAN_POINT('',(172.011422501814,-114.835940847691,0.));
#2050=CARTESIAN_POINT('',(173.079526951293,-116.409921517092,0.));
#2051=CARTESIAN_POINT('',(173.903621956766,-118.120247170102,0.));
#2052=CARTESIAN_POINT('',(174.466281341235,-119.928961498981,0.));
#2053=CARTESIAN_POINT('',(174.756440303464,-121.794286629022,0.));
#2054=CARTESIAN_POINT('',(174.769778995905,-123.678163825632,0.));
#2055=CARTESIAN_POINT('',(174.507084029144,-125.538552946145,0.));
#2056=CARTESIAN_POINT('',(173.975770981959,-127.335441637607,0.));
#2057=CARTESIAN_POINT('',(173.187413421874,-129.032139989043,0.));
#2058=CARTESIAN_POINT('',(172.163193346127,-130.587918419009,0.));
#2059=CARTESIAN_POINT('',(170.922581815368,-131.975532425511,0.));
#2060=CARTESIAN_POINT('',(169.498146089898,-133.160636519496,0.));
#2061=CARTESIAN_POINT('',(167.917053473946,-134.122926024472,0.));
#2062=CARTESIAN_POINT('',(166.21744202022,-134.840142482178,0.));
#2063=CARTESIAN_POINT('',(164.435440985904,-135.29907450812,0.));
#2064=CARTESIAN_POINT('',(162.609962649764,-135.49097049889,0.));
#2065=CARTESIAN_POINT('',(160.780769878667,-135.412925267166,0.));
#2066=CARTESIAN_POINT('',(158.988925976304,-135.068597322652,0.));
#2067=CARTESIAN_POINT('',(157.269394264977,-134.465725788843,0.));
#2068=CARTESIAN_POINT('',(155.663659687324,-133.620531268163,0.));
#2069=CARTESIAN_POINT('',(154.201358366136,-132.550328094617,0.));
#2070=CARTESIAN_POINT('',(152.916604460629,-131.281572685918,0.));
#2071=CARTESIAN_POINT('',(151.833730979462,-129.840144091147,0.));
#2072=CARTESIAN_POINT('',(150.977925021754,-128.262265338773,0.));
#2073=CARTESIAN_POINT('',(150.363736823062,-126.578812773376,0.));
#2074=CARTESIAN_POINT('',(150.004411331286,-124.827446473506,0.));
#2075=CARTESIAN_POINT('',(149.906351315792,-123.04917991948,0.));
#2076=CARTESIAN_POINT('',(150.069970597748,-121.279021368989,0.));
#2077=CARTESIAN_POINT('',(150.490588751019,-119.557120692461,0.));
#2078=CARTESIAN_POINT('',(151.157205060274,-117.920633429936,0.));
#2079=CARTESIAN_POINT('',(152.054996609224,-116.402902216918,0.));
#2080=CARTESIAN_POINT('',(153.161971888738,-115.038091663772,0.));
#2081=CARTESIAN_POINT('',(154.454972838541,-113.852789621107,0.));
#2082=CARTESIAN_POINT('',(155.901945336115,-112.874189068001,0.));
#2083=CARTESIAN_POINT('',(157.474165080937,-112.119693756511,0.));
#2084=CARTESIAN_POINT('',(159.135531358839,-111.605823308871,0.));
#2085=CARTESIAN_POINT('',(160.848168981599,-111.342221927186,0.));
#2086=CARTESIAN_POINT('',(162.577125517401,-111.332808007849,0.));
#2087=CARTESIAN_POINT('',(164.283251283742,-111.576523932254,0.));
#2088=CARTESIAN_POINT('',(165.931086676664,-112.066668502415,0.));
#2089=CARTESIAN_POINT('',(167.485782564278,-112.79218443423,0.));
#2090=CARTESIAN_POINT('',(168.910669690094,-113.733601488656,0.));
#2091=CARTESIAN_POINT('',(170.180708739812,-114.87291255605,0.));
#2092=CARTESIAN_POINT('',(171.264557953874,-116.180047346399,0.));
#2093=CARTESIAN_POINT('',(172.143841404756,-117.630316196781,0.));
#2094=CARTESIAN_POINT('',(172.797911274155,-119.187495702467,0.));
#2095=CARTESIAN_POINT('',(173.215582617379,-120.820470994806,0.));
#2096=CARTESIAN_POINT('',(173.38845213864,-122.491710315576,0.));
#2097=CARTESIAN_POINT('',(173.314127338727,-124.166644157206,0.));
#2098=CARTESIAN_POINT('',(172.996319758251,-125.805176179257,0.));
#2099=CARTESIAN_POINT('',(172.441979221455,-127.377793812536,0.));
#2100=CARTESIAN_POINT('',(171.666240113447,-128.845160388797,0.));
#2101=CARTESIAN_POINT('',(170.685934086998,-130.179924535156,0.));
#2102=CARTESIAN_POINT('',(169.523068592763,-131.353251644862,0.));
#2103=CARTESIAN_POINT('',(168.20556476479,-132.339473836901,0.));
#2104=CARTESIAN_POINT('',(166.761006380795,-133.119867927822,0.));
#2105=CARTESIAN_POINT('',(165.222218379538,-133.677947265745,0.));
#2106=CARTESIAN_POINT('',(163.623606671492,-134.003104239575,0.));
#2107=CARTESIAN_POINT('',(161.998390120092,-134.08987858942,0.));
#2108=CARTESIAN_POINT('',(160.383288020233,-133.937538724602,0.));
#2109=CARTESIAN_POINT('',(158.812654804792,-133.550895566346,0.));
#2110=CARTESIAN_POINT('',(157.32061855531,-132.939847353266,0.));
#2111=CARTESIAN_POINT('',(155.938725817958,-132.11904288809,0.));
#2112=CARTESIAN_POINT('',(154.695696379275,-131.10711648371,0.));
#2113=CARTESIAN_POINT('',(153.617853598508,-129.927094899153,0.));
#2114=CARTESIAN_POINT('',(152.727694319888,-128.605772255261,0.));
#2115=CARTESIAN_POINT('',(152.043122995138,-127.171974328193,0.));
#2116=CARTESIAN_POINT('',(151.578243679649,-125.659224005456,0.));
#2117=CARTESIAN_POINT('',(151.340884338282,-124.098390872289,0.));
#2118=CARTESIAN_POINT('',(151.335388162373,-122.524160945015,0.));
#2119=CARTESIAN_POINT('',(151.56010861796,-120.9720621388,0.));
#2120=CARTESIAN_POINT('',(152.009188061494,-119.47328184024,0.));
#2121=CARTESIAN_POINT('',(152.671010730422,-118.061897662172,0.));
#2122=CARTESIAN_POINT('',(153.530654678299,-116.766269285085,0.));
#2123=CARTESIAN_POINT('',(154.56727305171,-115.615242869064,0.));
#2124=CARTESIAN_POINT('',(155.758129111386,-114.631597095139,0.));
#2125=CARTESIAN_POINT('',(157.076438408734,-113.835880481664,0.));
#2126=CARTESIAN_POINT('',(158.492886317193,-113.244112208844,0.));
#2127=CARTESIAN_POINT('',(159.976442348337,-112.867941697522,0.));
#2128=CARTESIAN_POINT('',(161.493288836528,-112.714086293032,0.));
#2129=CARTESIAN_POINT('',(163.013657148226,-112.784624087795,0.));
#2130=CARTESIAN_POINT('',(164.499403926661,-113.075990105265,0.));
#2131=CARTESIAN_POINT('',(165.924669515334,-113.581679557636,0.));
#2132=CARTESIAN_POINT('',(167.253615168784,-114.287776094898,0.));
#2133=CARTESIAN_POINT('',(168.461582451708,-115.17883403141,0.));
#2134=CARTESIAN_POINT('',(169.522581038521,-116.234799207481,0.));
#2135=CARTESIAN_POINT('',(170.413290775642,-117.429981845652,0.));
#2136=CARTESIAN_POINT('',(171.117133041949,-118.739279808936,0.));
#2137=CARTESIAN_POINT('',(171.619618077272,-120.134052733836,0.));
#2138=CARTESIAN_POINT('',(171.910690528197,-121.580891772494,0.));
#2139=CARTESIAN_POINT('',(171.98604181419,-123.052040678592,0.));
#2140=CARTESIAN_POINT('',(171.845222167292,-124.511512974977,0.));
#2141=CARTESIAN_POINT('',(171.492401278432,-125.931740515766,0.));
#2142=CARTESIAN_POINT('',(170.937124341003,-127.278938406527,0.));
#2143=CARTESIAN_POINT('',(170.19289347312,-128.525756664921,0.));
#2144=CARTESIAN_POINT('',(169.276040013254,-129.646841498334,0.));
#2145=CARTESIAN_POINT('',(168.208944608518,-130.617258113736,0.));
#2146=CARTESIAN_POINT('',(167.013562854931,-131.418654163931,0.));
#2147=CARTESIAN_POINT('',(165.719582445098,-132.032906298824,0.));
#2148=CARTESIAN_POINT('',(164.353127590169,-132.449604483207,0.));
#2149=CARTESIAN_POINT('',(162.944778617817,-132.660352250135,0.));
#2150=CARTESIAN_POINT('',(161.526732669803,-132.662129584053,0.));
#2151=CARTESIAN_POINT('',(160.127373868845,-132.456310326153,0.));
#2152=CARTESIAN_POINT('',(158.778233905914,-132.048527381667,0.));
#2153=CARTESIAN_POINT('',(157.509050952861,-131.449841911806,0.));
#2154=CARTESIAN_POINT('',(156.343877986949,-130.672803232512,0.));
#2155=CARTESIAN_POINT('',(155.310615927105,-129.737782495695,0.));
#2156=CARTESIAN_POINT('',(154.427959454121,-128.664038738626,0.));
#2157=CARTESIAN_POINT('',(153.715277067261,-127.47681580806,0.));
#2158=CARTESIAN_POINT('',(153.186333865318,-126.202075207289,0.));
#2159=CARTESIAN_POINT('',(152.851505553824,-124.868116557944,0.));
#2160=CARTESIAN_POINT('',(152.716686302418,-123.504645413065,0.));
#2161=CARTESIAN_POINT('',(152.783163591319,-122.141114495217,0.));
#2162=CARTESIAN_POINT('',(153.048379271322,-120.806055960717,0.));
#2163=CARTESIAN_POINT('',(153.504749479942,-119.529945277432,0.));
#2164=CARTESIAN_POINT('',(154.141442832108,-118.338387361079,0.));
#2165=CARTESIAN_POINT('',(154.943428724661,-117.256991410137,0.));
#2166=CARTESIAN_POINT('',(155.892371134606,-116.30837250087,0.));
#2167=CARTESIAN_POINT('',(156.965302253247,-115.512994346356,0.));
#2168=CARTESIAN_POINT('',(158.139962332039,-114.885503610372,0.));
#2169=CARTESIAN_POINT('',(159.388919592016,-114.439095755474,0.));
#2170=CARTESIAN_POINT('',(160.68582017601,-114.181687057582,0.));
#2171=CARTESIAN_POINT('',(162.000939886623,-114.11777906744,0.));
#2172=CARTESIAN_POINT('',(163.306826577791,-114.247143036641,0.));
#2173=CARTESIAN_POINT('',(164.57554320694,-114.565969556673,0.));
#2174=CARTESIAN_POINT('',(165.778149374236,-115.065398803336,0.));
#2175=CARTESIAN_POINT('',(166.890109550927,-115.733207778263,0.));
#2176=CARTESIAN_POINT('',(167.888937542184,-116.554603106601,0.));
#2177=CARTESIAN_POINT('',(168.752501705506,-117.509417678696,0.));
#2178=CARTESIAN_POINT('',(169.46458786198,-118.57793004259,0.));
#2179=CARTESIAN_POINT('',(170.009206871208,-119.733411458392,0.));
#2180=CARTESIAN_POINT('',(170.377306363531,-120.952821543656,0.));
#2181=CARTESIAN_POINT('',(170.561528585006,-122.207514059428,0.));
#2182=CARTESIAN_POINT('',(170.559608742975,-123.471431661331,0.));
#2183=CARTESIAN_POINT('',(170.372802960501,-124.716624901691,0.));
#2184=CARTESIAN_POINT('',(170.006456162447,-125.916361959694,0.));
#2185=CARTESIAN_POINT('',(169.470603753163,-127.043890022762,0.));
#2186=CARTESIAN_POINT('',(168.776672559065,-128.077966187357,0.));
#2187=CARTESIAN_POINT('',(167.942809472905,-128.994010164231,0.));
#2188=CARTESIAN_POINT('',(166.986942075924,-129.775130879485,0.));
#2189=CARTESIAN_POINT('',(165.93027261825,-130.405218995686,0.));
#2190=CARTESIAN_POINT('',(164.797832728855,-130.871144238723,0.));
#2191=CARTESIAN_POINT('',(163.613467635603,-131.164769971629,0.));
#2192=CARTESIAN_POINT('',(162.40331102434,-131.280756240587,0.));
#2193=CARTESIAN_POINT('',(161.194912028234,-131.218130785522,0.));
#2194=CARTESIAN_POINT('',(160.012669612113,-130.979528301977,0.));
#2195=CARTESIAN_POINT('',(158.883639368502,-130.571819320511,0.));
#2196=CARTESIAN_POINT('',(157.830607272894,-130.004928053184,0.));
#2197=CARTESIAN_POINT('',(156.875986753603,-129.292320145423,0.));
#2198=CARTESIAN_POINT('',(156.039663917597,-128.450456412315,0.));
#2199=CARTESIAN_POINT('',(155.339477129018,-127.499578514124,0.));
#2200=CARTESIAN_POINT('',(154.788662026523,-126.460581901977,0.));
#2201=CARTESIAN_POINT('',(154.397695913557,-125.355790202675,0.));
#2202=CARTESIAN_POINT('',(154.174209434544,-124.210161862264,0.));
#2203=CARTESIAN_POINT('',(154.121594047558,-123.049893595707,0.));
#2204=CARTESIAN_POINT('',(154.239463890333,-121.898424379538,0.));
#2205=CARTESIAN_POINT('',(154.524191589756,-120.781133649312,0.));
#2206=CARTESIAN_POINT('',(154.967675208124,-119.723149261022,0.));
#2207=CARTESIAN_POINT('',(155.559114995347,-118.745878250753,0.));
#2208=CARTESIAN_POINT('',(156.284517143214,-117.869752443721,0.));
#2209=CARTESIAN_POINT('',(157.127464207909,-117.112499831169,0.));
#2210=CARTESIAN_POINT('',(158.068911504292,-116.48979204404,0.));
#2211=CARTESIAN_POINT('',(159.085960677573,-116.014697685116,0.));
#2212=CARTESIAN_POINT('',(160.158003733968,-115.69514526708,0.));
#2213=CARTESIAN_POINT('',(161.260071289721,-115.537309081747,0.));
#2214=CARTESIAN_POINT('',(162.368438469801,-115.542865655436,0.));
#2215=CARTESIAN_POINT('',(163.460413378962,-115.710635397279,0.));
#2216=CARTESIAN_POINT('',(164.510432324594,-116.035481403098,0.));
#2217=CARTESIAN_POINT('',(165.495848885201,-116.50807868315,0.));
#2218=CARTESIAN_POINT('',(166.399470132583,-117.119207379754,0.));
#2219=CARTESIAN_POINT('',(167.198101866427,-117.851610468872,0.));
#2220=CARTESIAN_POINT('',(167.878136393236,-118.690079517114,0.));
#2221=CARTESIAN_POINT('',(168.425202314903,-119.615338938575,0.));
#2222=CARTESIAN_POINT('',(168.828514266583,-120.605976927546,0.));
#2223=CARTESIAN_POINT('',(169.080995271661,-121.641150590768,0.));
#2224=CARTESIAN_POINT('',(169.178156393372,-122.697183004518,0.));
#2225=CARTESIAN_POINT('',(169.119442385601,-123.750884492998,0.));
#2226=CARTESIAN_POINT('',(168.907770216509,-124.779353691622,0.));
#2227=CARTESIAN_POINT('',(168.548832961177,-125.761686926433,0.));
#2228=CARTESIAN_POINT('',(168.051672184028,-126.676603244028,0.));
#2229=CARTESIAN_POINT('',(167.428280653736,-127.504672341458,0.));
#2230=CARTESIAN_POINT('',(166.694599515369,-128.227884200604,0.));
#2231=CARTESIAN_POINT('',(165.864940908625,-128.83377717319,0.));
#2232=CARTESIAN_POINT('',(164.961292938082,-129.308097548337,0.));
#2233=CARTESIAN_POINT('',(164.000827842292,-129.64351432694,0.));
#2234=CARTESIAN_POINT('',(163.008033881745,-129.833056117806,0.));
#2235=CARTESIAN_POINT('',(162.33454480292,-129.860851474757,0.));
#2236=CARTESIAN_POINT('',(162.000527127788,-129.849898205534,0.));
#2237=CARTESIAN_POINT('',(162.,-139.25,0.));
#2238=CARTESIAN_POINT('',(161.20628120964,-139.238936326906,0.));
#2239=CARTESIAN_POINT('',(160.016194749845,-139.134457472781,0.));
#2240=CARTESIAN_POINT('',(158.458674441971,-138.823019048275,0.));
#2241=CARTESIAN_POINT('',(156.930968509973,-138.397606236733,0.));
#2242=CARTESIAN_POINT('',(155.091636380898,-137.658498962568,0.));
#2243=CARTESIAN_POINT('',(153.041136009255,-136.459695644647,0.));
#2244=CARTESIAN_POINT('',(151.192899099003,-134.975761945213,0.));
#2245=CARTESIAN_POINT('',(149.584590975293,-133.239080133237,0.));
#2246=CARTESIAN_POINT('',(148.25281550808,-131.291058957086,0.));
#2247=CARTESIAN_POINT('',(147.222869974318,-129.172507883842,0.));
#2248=CARTESIAN_POINT('',(146.516226843929,-126.928983950821,0.));
#2249=CARTESIAN_POINT('',(146.147477249509,-124.612686065398,0.));
#2250=CARTESIAN_POINT('',(146.122711737593,-122.270058782317,0.));
#2251=CARTESIAN_POINT('',(146.441152141317,-119.956184237323,0.));
#2252=CARTESIAN_POINT('',(147.094397207938,-117.717854472642,0.));
#2253=CARTESIAN_POINT('',(148.067515918526,-115.603454826846,0.));
#2254=CARTESIAN_POINT('',(149.337049357845,-113.65985728198,0.));
#2255=CARTESIAN_POINT('',(150.875488241882,-111.926409120675,0.));
#2256=CARTESIAN_POINT('',(152.648014597433,-110.440755456159,0.));
#2257=CARTESIAN_POINT('',(154.614484126268,-109.234263379757,0.));
#2258=CARTESIAN_POINT('',(156.73270099596,-108.331093136435,0.));
#2259=CARTESIAN_POINT('',(158.955566736548,-107.749906270783,0.));
#2260=CARTESIAN_POINT('',(161.234952841226,-107.501687536335,0.));
#2261=CARTESIAN_POINT('',(163.52172336457,-107.59053984836,0.));
#2262=CARTESIAN_POINT('',(165.765408567735,-108.013064207132,0.));
#2263=CARTESIAN_POINT('',(167.91837486431,-108.758633042291,0.));
#2264=CARTESIAN_POINT('',(169.935133141716,-109.810481228575,0.));
#2265=CARTESIAN_POINT('',(171.770027554399,-111.142761975576,0.));
#2266=CARTESIAN_POINT('',(173.387441092081,-112.727696123649,0.));
#2267=CARTESIAN_POINT('',(174.751611276778,-114.528992926315,0.));
#2268=CARTESIAN_POINT('',(175.834185674508,-116.506575058446,0.));
#2269=CARTESIAN_POINT('',(176.612915009641,-118.616367536987,0.));
#2270=CARTESIAN_POINT('',(177.072780238207,-120.81329557476,0.));
#2271=CARTESIAN_POINT('',(177.204874821995,-123.049395093862,0.));
#2272=CARTESIAN_POINT('',(177.007930391218,-125.274799755581,0.));
#2273=CARTESIAN_POINT('',(176.487494846329,-127.44346093542,0.));
#2274=CARTESIAN_POINT('',(175.656168839798,-129.507752797628,0.));
#2275=CARTESIAN_POINT('',(174.533338085418,-131.423419235084,0.));
#2276=CARTESIAN_POINT('',(173.144987332746,-133.149436661106,0.));
#2277=CARTESIAN_POINT('',(171.520671380976,-134.650681528017,0.));
#2278=CARTESIAN_POINT('',(169.699575212145,-135.893173429231,0.));
#2279=CARTESIAN_POINT('',(167.718996316369,-136.853652135691,0.));
#2280=CARTESIAN_POINT('',(165.622858811226,-137.51158338422,0.));
#2281=CARTESIAN_POINT('',(163.459314142292,-137.85373357419,0.));
#2282=CARTESIAN_POINT('',(161.273290487514,-137.874907559788,0.));
#2283=CARTESIAN_POINT('',(159.110617607258,-137.575082650259,0.));
#2284=CARTESIAN_POINT('',(157.023488995635,-136.96358510711,0.));
#2285=CARTESIAN_POINT('',(155.049928800941,-136.052999080487,0.));
#2286=CARTESIAN_POINT('',(153.237602117229,-134.866536034049,0.));
#2287=CARTESIAN_POINT('',(151.62130157776,-133.429054486412,0.));
#2288=CARTESIAN_POINT('',(150.237783743132,-131.775055064288,0.));
#2289=CARTESIAN_POINT('',(149.113649494836,-129.938872100302,0.));
#2290=CARTESIAN_POINT('',(148.273408488021,-127.962569885563,0.));
#2291=CARTESIAN_POINT('',(147.733477308911,-125.889074923399,0.));
#2292=CARTESIAN_POINT('',(147.504194970651,-123.763118683876,0.));
#2293=CARTESIAN_POINT('',(147.589296923942,-121.631441880782,0.));
#2294=CARTESIAN_POINT('',(147.985243612117,-119.540641770774,0.));
#2295=CARTESIAN_POINT('',(148.682523576708,-117.534281244076,0.));
#2296=CARTESIAN_POINT('',(149.663907349085,-115.657353870285,0.));
#2297=CARTESIAN_POINT('',(150.907683509285,-113.948076123495,0.));
#2298=CARTESIAN_POINT('',(152.385075957414,-112.443684412547,0.));
#2299=CARTESIAN_POINT('',(154.06456366485,-111.174454752951,0.));
#2300=CARTESIAN_POINT('',(155.907466984162,-110.168351857812,0.));
#2301=CARTESIAN_POINT('',(157.87128000263,-109.44576427095,0.));
#2302=CARTESIAN_POINT('',(159.918544249333,-109.019521435967,0.));
#2303=CARTESIAN_POINT('',(161.998549811169,-108.898943960524,0.));
#2304=CARTESIAN_POINT('',(164.070389592622,-109.084437242008,0.));
#2305=CARTESIAN_POINT('',(166.087810202706,-109.571048298232,0.));
#2306=CARTESIAN_POINT('',(168.006783754512,-110.346243699964,0.));
#2307=CARTESIAN_POINT('',(169.788201632902,-111.392999631168,0.));
#2308=CARTESIAN_POINT('',(171.391819551874,-112.685910067946,0.));
#2309=CARTESIAN_POINT('',(172.786136632856,-114.197911494124,0.));
#2310=CARTESIAN_POINT('',(173.939379396637,-115.892320767255,0.));
#2311=CARTESIAN_POINT('',(174.830122383244,-117.734403130965,0.));
#2312=CARTESIAN_POINT('',(175.439381287904,-119.683302690919,0.));
#2313=CARTESIAN_POINT('',(175.755047773175,-121.694024493383,0.));
#2314=CARTESIAN_POINT('',(175.772291851262,-123.725534897493,0.));
#2315=CARTESIAN_POINT('',(175.491792477367,-125.732488309829,0.));
#2316=CARTESIAN_POINT('',(174.921410510075,-127.671656862643,0.));
#2317=CARTESIAN_POINT('',(174.073445352631,-129.503537923627,0.));
#2318=CARTESIAN_POINT('',(172.970553214701,-131.18411173763,0.));
#2319=CARTESIAN_POINT('',(171.633610646291,-132.683852065052,0.));
#2320=CARTESIAN_POINT('',(170.097640695432,-133.965544457836,0.));
#2321=CARTESIAN_POINT('',(168.391885592439,-135.00712910575,0.));
#2322=CARTESIAN_POINT('',(166.557464229188,-135.784414141738,0.));
#2323=CARTESIAN_POINT('',(164.633321670184,-136.283003064715,0.));
#2324=CARTESIAN_POINT('',(162.661324910034,-136.493290372317,0.));
#2325=CARTESIAN_POINT('',(160.684462995734,-136.411924356577,0.));
#2326=CARTESIAN_POINT('',(158.74713340011,-136.042671435809,0.));
#2327=CARTESIAN_POINT('',(156.887183661344,-135.39373128266,0.));
#2328=CARTESIAN_POINT('',(155.149535948141,-134.482474910712,0.));
#2329=CARTESIAN_POINT('',(153.566339646157,-133.327518695893,0.));
#2330=CARTESIAN_POINT('',(152.174475033827,-131.957241635029,0.));
#2331=CARTESIAN_POINT('',(151.00042362003,-130.399503499035,0.));
#2332=CARTESIAN_POINT('',(150.071610977588,-128.693390048314,0.));
#2333=CARTESIAN_POINT('',(149.403951651763,-126.872252779156,0.));
#2334=CARTESIAN_POINT('',(149.011955142585,-124.976804644931,0.));
#2335=CARTESIAN_POINT('',(148.902725151408,-123.051459167532,0.));
#2336=CARTESIAN_POINT('',(149.076860571258,-121.134040260781,0.));
#2337=CARTESIAN_POINT('',(149.529506464717,-119.267978132356,0.));
#2338=CARTESIAN_POINT('',(150.248939392742,-117.493615532528,0.));
#2339=CARTESIAN_POINT('',(151.219266957654,-115.847165186065,0.));
#2340=CARTESIAN_POINT('',(152.41680548398,-114.365769331108,0.));
#2341=CARTESIAN_POINT('',(153.816571895762,-113.0783715366,0.));
#2342=CARTESIAN_POINT('',(155.383908481725,-112.014588797447,0.));
#2343=CARTESIAN_POINT('',(157.087890448328,-111.193361633636,0.));
#2344=CARTESIAN_POINT('',(158.889420329482,-110.632828949956,0.));
#2345=CARTESIAN_POINT('',(160.747450553052,-110.343650233363,0.));
#2346=CARTESIAN_POINT('',(162.624054676495,-110.330266049919,0.));
#2347=CARTESIAN_POINT('',(164.476728209905,-110.591715582882,0.));
#2348=CARTESIAN_POINT('',(166.266900939178,-111.120875199325,0.));
#2349=CARTESIAN_POINT('',(167.956804126276,-111.905942018888,0.));
#2350=CARTESIAN_POINT('',(169.506529284074,-112.925982616637,0.));
#2351=CARTESIAN_POINT('',(170.888741116753,-114.161584376764,0.));
#2352=CARTESIAN_POINT('',(172.069228432959,-115.580215417383,0.));
#2353=CARTESIAN_POINT('',(173.027868387938,-117.155138992244,0.));
#2354=CARTESIAN_POINT('',(173.742039811536,-118.847048238703,0.));
#2355=CARTESIAN_POINT('',(174.199441349875,-120.622190709226,0.));
#2356=CARTESIAN_POINT('',(174.390761676649,-122.439919457193,0.));
#2357=CARTESIAN_POINT('',(174.313171262195,-124.262601160657,0.));
#2358=CARTESIAN_POINT('',(173.970499076656,-126.046582545292,0.));
#2359=CARTESIAN_POINT('',(173.370132260085,-127.759682678925,0.));
#2360=CARTESIAN_POINT('',(172.528361536414,-129.358999113949,0.));
#2361=CARTESIAN_POINT('',(171.463394790244,-130.814634400843,0.));
#2362=CARTESIAN_POINT('',(170.198955892416,-132.095193775637,0.));
#2363=CARTESIAN_POINT('',(168.765309388827,-133.172533443938,0.));
#2364=CARTESIAN_POINT('',(167.192404495236,-134.026072912097,0.));
#2365=CARTESIAN_POINT('',(165.515940099082,-134.637650742211,0.));
#2366=CARTESIAN_POINT('',(163.773374372977,-134.995511353723,0.));
#2367=CARTESIAN_POINT('',(162.000939147718,-135.093519790203,0.));
#2368=CARTESIAN_POINT('',(160.238598426641,-134.930700291781,0.));
#2369=CARTESIAN_POINT('',(158.523781294286,-134.512073519429,0.));
#2370=CARTESIAN_POINT('',(156.893827252727,-133.848229313654,0.));
#2371=CARTESIAN_POINT('',(155.38326593272,-132.954970297162,0.));
#2372=CARTESIAN_POINT('',(154.023577351949,-131.852481431272,0.));
#2373=CARTESIAN_POINT('',(152.843647304787,-130.56577254582,0.));
#2374=CARTESIAN_POINT('',(151.868193319371,-129.124008674525,0.));
#2375=CARTESIAN_POINT('',(151.116865938755,-127.558446350349,0.));
#2376=CARTESIAN_POINT('',(150.605319763175,-125.905658779546,0.));
#2377=CARTESIAN_POINT('',(150.34231901035,-124.199346439079,0.));
#2378=CARTESIAN_POINT('',(150.332825655457,-122.477431049387,0.));
#2379=CARTESIAN_POINT('',(150.57524483127,-120.778787286634,0.));
#2380=CARTESIAN_POINT('',(151.063335119127,-119.137613273336,0.));
#2381=CARTESIAN_POINT('',(151.784611295776,-117.591138663702,0.));
#2382=CARTESIAN_POINT('',(152.722959746798,-116.170490875074,0.));
#2383=CARTESIAN_POINT('',(153.855731838822,-114.907409483223,0.));
#2384=CARTESIAN_POINT('',(155.158169078598,-113.827002589382,0.));
#2385=CARTESIAN_POINT('',(156.601045364329,-112.951956301653,0.));
#2386=CARTESIAN_POINT('',(158.152311038494,-112.300010134376,0.));
#2387=CARTESIAN_POINT('',(159.778043259348,-111.8840962268,0.));
#2388=CARTESIAN_POINT('',(161.441337122632,-111.711770812983,0.));
#2389=CARTESIAN_POINT('',(163.109518086497,-111.785555506903,0.));
#2390=CARTESIAN_POINT('',(164.740713910778,-112.10177340787,0.));
#2391=CARTESIAN_POINT('',(166.306481057123,-112.653479112387,0.));
#2392=CARTESIAN_POINT('',(167.767391845526,-113.425601448053,0.));
#2393=CARTESIAN_POINT('',(169.096245597491,-114.40131652843,0.));
#2394=CARTESIAN_POINT('',(170.264495362941,-115.558860007501,0.));
#2395=CARTESIAN_POINT('',(171.246323060815,-116.870174989975,0.));
#2396=CARTESIAN_POINT('',(172.023314066063,-118.307792911451,0.));
#2397=CARTESIAN_POINT('',(172.579332299962,-119.840316314518,0.));
#2398=CARTESIAN_POINT('',(172.903104508855,-121.431066509017,0.));
#2399=CARTESIAN_POINT('',(172.989696560918,-123.04950707159,0.));
#2400=CARTESIAN_POINT('',(172.838408499385,-124.656130345594,0.));
#2401=CARTESIAN_POINT('',(172.45358942895,-126.220645453818,0.));
#2402=CARTESIAN_POINT('',(171.845508384794,-127.705754103999,0.));
#2403=CARTESIAN_POINT('',(171.028831767983,-129.08123141146,0.));
#2404=CARTESIAN_POINT('',(170.021373522245,-130.319015076631,0.));
#2405=CARTESIAN_POINT('',(168.847639932623,-131.391471989322,0.));
#2406=CARTESIAN_POINT('',(167.531718658618,-132.278220571893,0.));
#2407=CARTESIAN_POINT('',(166.106087167627,-132.959163459848,0.));
#2408=CARTESIAN_POINT('',(164.599492084556,-133.422569357491,0.));
#2409=CARTESIAN_POINT('',(163.045616118615,-133.65894071457,0.));
#2410=CARTESIAN_POINT('',(161.479988054679,-133.664707339515,0.));
#2411=CARTESIAN_POINT('',(159.93395897378,-133.441167907123,0.));
#2412=CARTESIAN_POINT('',(158.442432312195,-132.994345871974,0.));
#2413=CARTESIAN_POINT('',(157.038205866041,-132.336215730739,0.));
#2414=CARTESIAN_POINT('',(155.747949827547,-131.480408831291,0.));
#2415=CARTESIAN_POINT('',(154.602679555253,-130.44924327165,0.));
#2416=CARTESIAN_POINT('',(153.62324003288,-129.263861546579,0.));
#2417=CARTESIAN_POINT('',(152.831251036824,-127.952054107513,0.));
#2418=CARTESIAN_POINT('',(152.242148100872,-126.54246541388,0.));
#2419=CARTESIAN_POINT('',(151.867600600949,-125.066322024422,0.));
#2420=CARTESIAN_POINT('',(151.714346506477,-123.556336204967,0.));
#2421=CARTESIAN_POINT('',(151.78408429452,-122.045159465341,0.));
#2422=CARTESIAN_POINT('',(152.074221303521,-120.564433028071,0.));
#2423=CARTESIAN_POINT('',(152.576585707244,-119.148012798627,0.));
#2424=CARTESIAN_POINT('',(153.279375304966,-117.824383819803,0.));
#2425=CARTESIAN_POINT('',(154.16608323426,-116.622090606205,0.));
#2426=CARTESIAN_POINT('',(155.216641952839,-115.56624408754,0.));
#2427=CARTESIAN_POINT('',(156.405738702643,-114.679774471306,0.));
#2428=CARTESIAN_POINT('',(157.708786514797,-113.979159426007,0.));
#2429=CARTESIAN_POINT('',(159.095410255408,-113.479291241289,0.));
#2430=CARTESIAN_POINT('',(160.536387937425,-113.189195359727,0.));
#2431=CARTESIAN_POINT('',(161.998675507462,-113.114107957637,0.));
#2432=CARTESIAN_POINT('',(163.451832250899,-113.253990252698,0.));
#2433=CARTESIAN_POINT('',(164.864827666374,-113.604877892278,0.));
#2434=CARTESIAN_POINT('',(166.205342470902,-114.157171110261,0.));
#2435=CARTESIAN_POINT('',(167.445945514984,-114.897487348453,0.));
#2436=CARTESIAN_POINT('',(168.561447300074,-115.809547646412,0.));
#2437=CARTESIAN_POINT('',(169.527016424874,-116.871057184214,0.));
#2438=CARTESIAN_POINT('',(170.324410421048,-118.060163772629,0.));
#2439=CARTESIAN_POINT('',(170.935665549906,-119.347336265022,0.));
#2440=CARTESIAN_POINT('',(171.350413019172,-120.706951305551,0.));
#2441=CARTESIAN_POINT('',(171.560179759139,-122.107106192941,0.));
#2442=CARTESIAN_POINT('',(171.562183386728,-123.518720553878,0.));
#2443=CARTESIAN_POINT('',(171.357575083633,-124.910567241496,0.));
#2444=CARTESIAN_POINT('',(170.952107843335,-126.252693866905,0.));
#2445=CARTESIAN_POINT('',(170.356726734861,-127.515247791211,0.));
#2446=CARTESIAN_POINT('',(169.58394891503,-128.674375495132,0.));
#2447=CARTESIAN_POINT('',(168.653850092253,-129.702393999907,0.));
#2448=CARTESIAN_POINT('',(167.586318533677,-130.580208685077,0.));
#2449=CARTESIAN_POINT('',(166.404942930408,-131.289573921499,0.));
#2450=CARTESIAN_POINT('',(165.137658992953,-131.815550728931,0.));
#2451=CARTESIAN_POINT('',(163.811078776802,-132.148818032942,0.));
#2452=CARTESIAN_POINT('',(162.454306237963,-132.283153729692,0.));
#2453=CARTESIAN_POINT('',(161.098261704281,-132.217162613955,0.));
#2454=CARTESIAN_POINT('',(159.770347351336,-131.953534650876,0.));
#2455=CARTESIAN_POINT('',(158.5010116664,-131.499719306467,0.));
#2456=CARTESIAN_POINT('',(157.315944779693,-130.866626504034,0.));
#2457=CARTESIAN_POINT('',(156.24047770637,-130.069194816357,0.));
#2458=CARTESIAN_POINT('',(155.296992712939,-129.12562269696,0.));
#2459=CARTESIAN_POINT('',(154.505782789181,-128.058468371769,0.));
#2460=CARTESIAN_POINT('',(153.88197794575,-126.891089911446,0.));
#2461=CARTESIAN_POINT('',(153.437622549424,-125.648505134681,0.));
#2462=CARTESIAN_POINT('',(153.181569365972,-124.358739801087,0.));
#2463=CARTESIAN_POINT('',(153.117899590292,-123.05130365715,0.));
#2464=CARTESIAN_POINT('',(153.246419225018,-121.752522548041,0.));
#2465=CARTESIAN_POINT('',(153.563344113346,-120.490966939344,0.));
#2466=CARTESIAN_POINT('',(154.059822516787,-119.29510428942,0.));
#2467=CARTESIAN_POINT('',(154.723917480459,-118.189221994696,0.));
#2468=CARTESIAN_POINT('',(155.540051530774,-117.196556557398,0.));
#2469=CARTESIAN_POINT('',(156.489869037614,-116.337322554098,0.));
#2470=CARTESIAN_POINT('',(157.551998806628,-115.629431333421,0.));
#2471=CARTESIAN_POINT('',(158.700833438859,-115.087819957672,0.));
#2472=CARTESIAN_POINT('',(159.913146584289,-114.721758809533,0.));
#2473=CARTESIAN_POINT('',(161.16074539217,-114.538529014827,0.));
#2474=CARTESIAN_POINT('',(162.416771026809,-114.540317112438,0.));
#2475=CARTESIAN_POINT('',(163.655497692508,-114.726061980128,0.));
#2476=CARTESIAN_POINT('',(164.847850405133,-115.090197779386,0.));
#2477=CARTESIAN_POINT('',(165.968178700889,-115.622445753168,0.));
#2478=CARTESIAN_POINT('',(166.996861280024,-116.312625370617,0.));
#2479=CARTESIAN_POINT('',(167.907349522796,-117.141399546835,0.));
#2480=CARTESIAN_POINT('',(168.683971074788,-118.09168182128,0.));
#2481=CARTESIAN_POINT('',(169.310151323456,-119.141731219802,0.));
#2482=CARTESIAN_POINT('',(169.773364140521,-120.267308602544,0.));
#2483=CARTESIAN_POINT('',(170.065323124654,-121.444815730963,0.));
#2484=CARTESIAN_POINT('',(170.18064508034,-122.647494405767,0.));
#2485=CARTESIAN_POINT('',(170.118361934924,-123.848902712075,0.));
#2486=CARTESIAN_POINT('',(169.881492491411,-125.022902857428,0.));
#2487=CARTESIAN_POINT('',(169.47624579933,-126.145567485917,0.));
#2488=CARTESIAN_POINT('',(168.912667076826,-127.192497335432,0.));
#2489=CARTESIAN_POINT('',(168.20423103016,-128.141337173728,0.));
#2490=CARTESIAN_POINT('',(167.368816426736,-128.971451604439,0.));
#2491=CARTESIAN_POINT('',(166.422571621163,-129.668350583456,0.));
#2492=CARTESIAN_POINT('',(165.390456894808,-130.215444692599,0.));
#2493=CARTESIAN_POINT('',(164.292043643042,-130.604067777309,0.));
#2494=CARTESIAN_POINT('',(163.155168374143,-130.825932123328,0.));
#2495=CARTESIAN_POINT('',(162.383275347316,-130.860980323112,0.));
#2496=CARTESIAN_POINT('',(162.,-130.85,0.));
#2497=CARTESIAN_POINT('',(162.,-130.85,0.160016312426602));
#2498=CARTESIAN_POINT('',(161.510002422,-130.850453980597,0.160014864838597));
#2499=CARTESIAN_POINT('',(160.756506199041,-130.705855583619,0.160012947129875));
#2500=CARTESIAN_POINT('',(159.846965279078,-130.234329848762,0.160010731328032));
#2501=CARTESIAN_POINT('',(159.222393495473,-129.727181501607,0.160009154649621));
#2502=CARTESIAN_POINT('',(158.716405878601,-129.104127919788,0.160007701797951));
#2503=CARTESIAN_POINT('',(158.243493347309,-128.192371159267,0.160005987431465));
#2504=CARTESIAN_POINT('',(158.006453341984,-126.950349814647,0.160003984721792));
#2505=CARTESIAN_POINT('',(158.24389084313,-125.706554177015,0.160002454351023));
#2506=CARTESIAN_POINT('',(158.715714270387,-124.796955124877,0.160001568265075));
#2507=CARTESIAN_POINT('',(159.22282970679,-124.172399444749,0.160000997675413));
#2508=CARTESIAN_POINT('',(159.8457831802,-123.666392898521,0.160000556863956));
#2509=CARTESIAN_POINT('',(160.758095189739,-123.193556436559,0.16000014300973));
#2510=CARTESIAN_POINT('',(161.508929578691,-123.049790797953,0.160000001098123));
#2511=CARTESIAN_POINT('',(162.,-123.05,0.16));
#2512=CARTESIAN_POINT('',(162.000527127788,-129.849898205534,0.220022429586578));
#2513=CARTESIAN_POINT('',(161.635547643443,-129.850311432604,0.22002043915307));
#2514=CARTESIAN_POINT('',(161.074355329743,-129.742535895896,0.220017802303578));
#2515=CARTESIAN_POINT('',(160.397210302612,-129.390998278567,0.220014755576045));
#2516=CARTESIAN_POINT('',(159.932427490203,-129.01292313013,0.220012587643228));
#2517=CARTESIAN_POINT('',(159.556168430294,-128.548490835895,0.220010589972183));
#2518=CARTESIAN_POINT('',(159.204987600272,-127.868979997246,0.220008232718264));
#2519=CARTESIAN_POINT('',(159.030201912955,-126.943491529793,0.220005478992464));
#2520=CARTESIAN_POINT('',(159.209457054138,-126.017470008749,0.220003374732656));
#2521=CARTESIAN_POINT('',(159.562893558123,-125.341138251156,0.220002156364478));
#2522=CARTESIAN_POINT('',(159.942101038678,-124.877277066451,0.220001371803693));
#2523=CARTESIAN_POINT('',(160.407397494807,-124.50213246012,0.22000076568794));
#2524=CARTESIAN_POINT('',(161.088225556626,-124.152667005878,0.220000196638379));
#2525=CARTESIAN_POINT('',(161.647950614644,-124.04802678456,0.220000001509919));
#2526=CARTESIAN_POINT('',(162.013752830093,-124.04990542536,0.22));
#2527=CARTESIAN_POINT('',(162.000527127788,-129.849898205534,0.220022429586578));
#2528=CARTESIAN_POINT('',(161.635547643443,-129.850311432604,0.22002043915307));
#2529=CARTESIAN_POINT('',(161.074355329743,-129.742535895896,0.220017802303578));
#2530=CARTESIAN_POINT('',(160.397210302612,-129.390998278567,0.220014755576045));
#2531=CARTESIAN_POINT('',(159.932427490203,-129.01292313013,0.220012587643228));
#2532=CARTESIAN_POINT('',(159.556168430294,-128.548490835895,0.220010589972183));
#2533=CARTESIAN_POINT('',(159.204987600272,-127.868979997246,0.220008232718264));
#2534=CARTESIAN_POINT('',(159.030201912955,-126.943491529793,0.220005478992464));
#2535=CARTESIAN_POINT('',(159.209457054138,-126.017470008749,0.220003374732656));
#2536=CARTESIAN_POINT('',(159.562893558123,-125.341138251156,0.220002156364478));
#2537=CARTESIAN_POINT('',(159.942101038678,-124.877277066451,0.220001371803693));
#2538=CARTESIAN_POINT('',(160.407397494807,-124.50213246012,0.22000076568794));
#2539=CARTESIAN_POINT('',(161.088225556626,-124.152667005878,0.220000196638379));
#2540=CARTESIAN_POINT('',(161.647950614644,-124.04802678456,0.220000001509919));
#2541=CARTESIAN_POINT('',(162.013752830093,-124.04990542536,0.22));
#2542=CARTESIAN_POINT('',(162.000527127788,-129.849898205534,0.));
#2543=CARTESIAN_POINT('',(161.635547643443,-129.850311432604,0.));
#2544=CARTESIAN_POINT('',(161.074355329743,-129.742535895896,0.));
#2545=CARTESIAN_POINT('',(160.397210302612,-129.390998278567,0.));
#2546=CARTESIAN_POINT('',(159.932427490203,-129.01292313013,0.));
#2547=CARTESIAN_POINT('',(159.556168430294,-128.548490835895,0.));
#2548=CARTESIAN_POINT('',(159.204987600272,-127.868979997246,0.));
#2549=CARTESIAN_POINT('',(159.030201912955,-126.943491529793,0.));
#2550=CARTESIAN_POINT('',(159.209457054138,-126.017470008749,0.));
#2551=CARTESIAN_POINT('',(159.562893558123,-125.341138251156,0.));
#2552=CARTESIAN_POINT('',(159.942101038678,-124.877277066451,0.));
#2553=CARTESIAN_POINT('',(160.407397494807,-124.50213246012,0.));
#2554=CARTESIAN_POINT('',(161.088225556626,-124.152667005878,0.));
#2555=CARTESIAN_POINT('',(161.647950614644,-124.04802678456,0.));
#2556=CARTESIAN_POINT('',(162.013752830093,-124.04990542536,0.));
#2557=CARTESIAN_POINT('',(162.000527127788,-129.849898205534,0.));
#2558=CARTESIAN_POINT('',(161.635547643443,-129.850311432604,0.));
#2559=CARTESIAN_POINT('',(161.074355329743,-129.742535895896,0.));
#2560=CARTESIAN_POINT('',(160.397210302612,-129.390998278567,0.));
#2561=CARTESIAN_POINT('',(159.932427490203,-129.01292313013,0.));
#2562=CARTESIAN_POINT('',(159.556168430294,-128.548490835895,0.));
#2563=CARTESIAN_POINT('',(159.204987600272,-127.868979997246,0.));
#2564=CARTESIAN_POINT('',(159.030201912955,-126.943491529793,0.));
#2565=CARTESIAN_POINT('',(159.209457054138,-126.017470008749,0.));
#2566=CARTESIAN_POINT('',(159.562893558123,-125.341138251156,0.));
#2567=CARTESIAN_POINT('',(159.942101038678,-124.877277066451,0.));
#2568=CARTESIAN_POINT('',(160.407397494807,-124.50213246012,0.));
#2569=CARTESIAN_POINT('',(161.088225556626,-124.152667005878,0.));
#2570=CARTESIAN_POINT('',(161.647950614644,-124.04802678456,0.));
#2571=CARTESIAN_POINT('',(162.013752830093,-124.04990542536,0.));
#2572=CARTESIAN_POINT('',(162.,-130.85,0.));
#2573=CARTESIAN_POINT('',(161.510002422,-130.850453980597,0.));
#2574=CARTESIAN_POINT('',(160.756506199041,-130.705855583619,0.));
#2575=CARTESIAN_POINT('',(159.846965279078,-130.234329848762,0.));
#2576=CARTESIAN_POINT('',(159.222393495473,-129.727181501607,0.));
#2577=CARTESIAN_POINT('',(158.716405878601,-129.104127919788,0.));
#2578=CARTESIAN_POINT('',(158.243493347309,-128.192371159267,0.));
#2579=CARTESIAN_POINT('',(158.006453341984,-126.950349814647,0.));
#2580=CARTESIAN_POINT('',(158.24389084313,-125.706554177015,0.));
#2581=CARTESIAN_POINT('',(158.715714270387,-124.796955124877,0.));
#2582=CARTESIAN_POINT('',(159.22282970679,-124.172399444749,0.));
#2583=CARTESIAN_POINT('',(159.8457831802,-123.666392898521,0.));
#2584=CARTESIAN_POINT('',(160.758095189739,-123.193556436559,0.));
#2585=CARTESIAN_POINT('',(161.508929578691,-123.049790797953,0.));
#2586=CARTESIAN_POINT('',(162.,-123.05,0.));
#2587=CARTESIAN_POINT('',(168.,-139.01,0.23));
#2588=CARTESIAN_POINT('',(162.,-139.,0.175));
#2589=CARTESIAN_POINT('',(162.,-138.25,0.22));
#2590=CARTESIAN_POINT('',(164.,-139.,0.175));
#2591=CARTESIAN_POINT('',(164.,-138.25,0.22));
#2592=CARTESIAN_POINT('',(166.,-139.,0.175));
#2593=CARTESIAN_POINT('',(166.,-138.25,0.22));
#2594=CARTESIAN_POINT('',(168.,-139.,0.175));
#2595=CARTESIAN_POINT('',(168.,-138.25,0.22));
#2596=CARTESIAN_POINT('',(162.,-138.25,0.22));
#2597=CARTESIAN_POINT('',(162.,-138.25,0.));
#2598=CARTESIAN_POINT('',(164.,-138.25,0.22));
#2599=CARTESIAN_POINT('',(164.,-138.25,0.));
#2600=CARTESIAN_POINT('',(166.,-138.25,0.22));
#2601=CARTESIAN_POINT('',(166.,-138.25,0.));
#2602=CARTESIAN_POINT('',(168.,-138.25,0.22));
#2603=CARTESIAN_POINT('',(168.,-138.25,0.));
#2604=CARTESIAN_POINT('',(162.,-138.25,0.));
#2605=CARTESIAN_POINT('',(162.,-139.,0.));
#2606=CARTESIAN_POINT('',(164.,-138.25,0.));
#2607=CARTESIAN_POINT('',(164.,-139.,0.));
#2608=CARTESIAN_POINT('',(166.,-138.25,0.));
#2609=CARTESIAN_POINT('',(166.,-139.,0.));
#2610=CARTESIAN_POINT('',(168.,-138.25,0.));
#2611=CARTESIAN_POINT('',(168.,-139.,0.));
#2612=CARTESIAN_POINT('',(162.,-139.,0.));
#2613=CARTESIAN_POINT('',(162.666666666667,-140.083333333333,0.));
#2614=CARTESIAN_POINT('',(163.333333333333,-141.166666666667,0.));
#2615=CARTESIAN_POINT('',(164.,-142.25,0.));
#2616=CARTESIAN_POINT('',(162.,-139.,0.175));
#2617=CARTESIAN_POINT('',(162.666666666667,-140.083333333333,0.175));
#2618=CARTESIAN_POINT('',(163.333333333333,-141.166666666667,0.175));
#2619=CARTESIAN_POINT('',(164.,-142.25,0.175));
#2620=CARTESIAN_POINT('',(162.,-139.,0.));
#2621=CARTESIAN_POINT('',(162.,-139.,0.175));
#2622=CARTESIAN_POINT('',(164.,-139.,0.));
#2623=CARTESIAN_POINT('',(164.,-139.,0.175));
#2624=CARTESIAN_POINT('',(166.,-139.,0.));
#2625=CARTESIAN_POINT('',(166.,-139.,0.175));
#2626=CARTESIAN_POINT('',(168.,-139.,0.));
#2627=CARTESIAN_POINT('',(168.,-139.,0.175));
#2628=CARTESIAN_POINT('',(162.35,-139.,0.));
#2629=CARTESIAN_POINT('',(162.158427066695,-139.257443983379,0.));
#2630=CARTESIAN_POINT('',(162.,-139.,0.));
#2631=CARTESIAN_POINT('',(162.35,-139.,0.175));
#2632=CARTESIAN_POINT('',(162.158427066695,-139.257443983379,0.175));
#2633=CARTESIAN_POINT('',(162.,-139.,0.175));
#2634=CARTESIAN_POINT('',(161.021593720196,-139.20670080577,0.160000000000911));
#2635=CARTESIAN_POINT('',(161.021593720181,-139.206700805769,0.));
#2636=CARTESIAN_POINT('',(164.,-142.25,0.175));
#2637=CARTESIAN_POINT('',(164.,-142.25,0.));
#2638=CARTESIAN_POINT('',(163.021593720181,-142.456700805769,0.));
#2639=CARTESIAN_POINT('',(163.021593720196,-142.45670080577,0.160000000000911));
#2640=CARTESIAN_POINT('',(162.,-123.05,0.));
#2641=CARTESIAN_POINT('',(162.013752830093,-124.04990542536,0.));
#2642=CARTESIAN_POINT('',(162.013752830093,-124.04990542536,0.22));
#2643=CARTESIAN_POINT('',(162.,-123.05,0.16));
#2644=CARTESIAN_POINT('',(162.,-138.25,0.22));
#2645=CARTESIAN_POINT('',(162.,-138.25,0.));
#2646=CARTESIAN_POINT('',(162.,-130.85,0.160016312426602));
#2647=CARTESIAN_POINT('',(162.000527127788,-129.849898205534,0.220022429586578));
#2648=CARTESIAN_POINT('',(162.000527127788,-129.849898205534,0.));
#2649=CARTESIAN_POINT('',(162.,-130.85,0.));
#2650=CARTESIAN_POINT('',(168.,-139.,0.));
#2651=CARTESIAN_POINT('',(168.,-138.25,0.));
#2652=CARTESIAN_POINT('',(168.,-138.25,0.22));
#2653=CARTESIAN_POINT('',(168.,-139.,0.175));
#2654=CARTESIAN_POINT('',(162.,-139.,0.));
#2655=CARTESIAN_POINT('',(162.35,-139.,0.));
#2656=CARTESIAN_POINT('',(162.,-139.,0.175));
#2657=CARTESIAN_POINT('',(162.35,-139.,0.175));
#2658=CARTESIAN_POINT('',(162.35,-139.,0.));
#2659=CARTESIAN_POINT('',(162.35,-139.,0.175));
#2660=CARTESIAN_POINT('',(162.,-139.,0.));
#2661=CARTESIAN_POINT('',(162.158427066695,-139.257443983379,0.));
#2662=CARTESIAN_POINT('',(162.158427066695,-139.257443983379,0.));
#2663=CARTESIAN_POINT('',(162.158427066695,-139.257443983379,0.175));
#2664=CARTESIAN_POINT('',(162.,-139.,0.175));
#2665=CARTESIAN_POINT('',(162.158427066695,-139.257443983379,0.175));
#2666=CARTESIAN_POINT('',(162.158427066695,-139.257443983379,0.));
#2667=CARTESIAN_POINT('',(162.129569791083,-139.161206351323,0.));
#2668=CARTESIAN_POINT('',(162.189549389722,-139.080603175662,0.));
#2669=CARTESIAN_POINT('',(162.249528988361,-139.,0.));
#2670=CARTESIAN_POINT('',(162.35,-139.,0.));
#2671=CARTESIAN_POINT('',(162.158427066695,-139.257443983379,0.175));
#2672=CARTESIAN_POINT('',(162.129569791083,-139.161206351323,0.175));
#2673=CARTESIAN_POINT('',(162.189549389722,-139.080603175662,0.175));
#2674=CARTESIAN_POINT('',(162.249528988361,-139.,0.175));
#2675=CARTESIAN_POINT('',(162.35,-139.,0.175));
#2676=CARTESIAN_POINT('',(161.021593720181,-139.206700805769,0.));
#2677=CARTESIAN_POINT('',(161.021593720196,-139.20670080577,0.160000000000911));
#2678=CARTESIAN_POINT('',(162.,-139.,0.));
#2679=CARTESIAN_POINT('',(161.021593720181,-139.206700805769,0.));
#2680=CARTESIAN_POINT('',(164.,-142.25,0.));
#2681=CARTESIAN_POINT('',(164.,-142.25,0.175));
#2682=CARTESIAN_POINT('',(163.021593720181,-142.456700805769,0.));
#2683=CARTESIAN_POINT('',(164.,-142.25,0.));
#2684=CARTESIAN_POINT('',(163.021593720196,-142.45670080577,0.160000000000911));
#2685=CARTESIAN_POINT('',(163.021593720181,-142.456700805769,0.));
#2686=CARTESIAN_POINT('',(161.021593720196,-139.20670080577,0.160000000000911));
#2687=CARTESIAN_POINT('',(161.688260386862,-140.290034139104,0.160000000000911));
#2688=CARTESIAN_POINT('',(162.354927053529,-141.373367472437,0.160000000000911));
#2689=CARTESIAN_POINT('',(163.021593720196,-142.45670080577,0.160000000000911));
#2690=CARTESIAN_POINT('',(161.021593720196,-139.20670080577,0.160000000000911));
#2691=CARTESIAN_POINT('',(162.,-139.,0.175));
#2692=CARTESIAN_POINT('',(164.,-142.25,0.175));
#2693=CARTESIAN_POINT('',(163.021593720196,-142.45670080577,0.160000000000911));
#2694=CARTESIAN_POINT('',(161.021593720181,-139.206700805769,0.));
#2695=CARTESIAN_POINT('',(161.688260386847,-140.290034139103,0.));
#2696=CARTESIAN_POINT('',(162.354927053514,-141.373367472436,0.));
#2697=CARTESIAN_POINT('',(163.021593720181,-142.456700805769,0.));
#2698=CARTESIAN_POINT('',(162.,-123.05,0.));
#2699=CARTESIAN_POINT('',(162.,-123.05,0.16));
#2700=CARTESIAN_POINT('',(162.013752830093,-124.04990542536,0.));
#2701=CARTESIAN_POINT('',(162.,-123.05,0.));
#2702=CARTESIAN_POINT('',(162.013752830093,-124.04990542536,0.22));
#2703=CARTESIAN_POINT('',(162.013752830093,-124.04990542536,0.));
#2704=CARTESIAN_POINT('',(162.,-138.25,0.));
#2705=CARTESIAN_POINT('',(162.,-138.25,0.22));
#2706=CARTESIAN_POINT('',(162.,-123.05,0.16));
#2707=CARTESIAN_POINT('',(162.013752830093,-124.04990542536,0.22));
#2708=CARTESIAN_POINT('',(162.,-130.85,0.160016312426602));
#2709=CARTESIAN_POINT('',(161.510002422,-130.850453980597,0.160014864838597));
#2710=CARTESIAN_POINT('',(160.756506199041,-130.705855583619,0.160012947129875));
#2711=CARTESIAN_POINT('',(159.846965279078,-130.234329848762,0.160010731328032));
#2712=CARTESIAN_POINT('',(159.222393495473,-129.727181501607,0.160009154649621));
#2713=CARTESIAN_POINT('',(158.716405878601,-129.104127919788,0.160007701797951));
#2714=CARTESIAN_POINT('',(158.243493347309,-128.192371159267,0.160005987431465));
#2715=CARTESIAN_POINT('',(158.006453341984,-126.950349814647,0.160003984721792));
#2716=CARTESIAN_POINT('',(158.24389084313,-125.706554177015,0.160002454351023));
#2717=CARTESIAN_POINT('',(158.715714270387,-124.796955124877,0.160001568265075));
#2718=CARTESIAN_POINT('',(159.22282970679,-124.172399444749,0.160000997675413));
#2719=CARTESIAN_POINT('',(159.8457831802,-123.666392898521,0.160000556863956));
#2720=CARTESIAN_POINT('',(160.758095189739,-123.193556436559,0.16000014300973));
#2721=CARTESIAN_POINT('',(161.508929578691,-123.049790797953,0.160000001098123));
#2722=CARTESIAN_POINT('',(162.,-123.05,0.16));
#2723=CARTESIAN_POINT('',(162.,-138.25,0.22));
#2724=CARTESIAN_POINT('',(162.,-139.,0.175));
#2725=CARTESIAN_POINT('',(162.,-130.85,0.160016312426602));
#2726=CARTESIAN_POINT('',(162.000527127788,-129.849898205534,0.220022429586578));
#2727=CARTESIAN_POINT('',(162.,-138.25,0.22));
#2728=CARTESIAN_POINT('',(161.256093800753,-138.238980560157,0.219999999991424));
#2729=CARTESIAN_POINT('',(160.138104488042,-138.13981965863,0.220000000032593));
#2730=CARTESIAN_POINT('',(158.677895762533,-137.846393534278,0.219999999917724));
#2731=CARTESIAN_POINT('',(157.245508768744,-137.446144657727,0.220000000460307));
#2732=CARTESIAN_POINT('',(155.520586872203,-136.751183810633,0.219999998100007));
#2733=CARTESIAN_POINT('',(153.598487074189,-135.625059696191,0.220000006660472));
#2734=CARTESIAN_POINT('',(151.866708262255,-134.231961369766,0.220000008088622));
#2735=CARTESIAN_POINT('',(150.360236574877,-132.602196663604,0.220000012296246));
#2736=CARTESIAN_POINT('',(149.113438568196,-130.774756212837,0.220000016624268));
#2737=CARTESIAN_POINT('',(148.149917787688,-128.788007089964,0.220000021787314));
#2738=CARTESIAN_POINT('',(147.489673267491,-126.684735236932,0.220000027598419));
#2739=CARTESIAN_POINT('',(147.146222853903,-124.51387073627,0.220000034099675));
#2740=CARTESIAN_POINT('',(147.125143020994,-122.318941224846,0.220000041288923));
#2741=CARTESIAN_POINT('',(147.425569441703,-120.151542881184,0.220000049156416));
#2742=CARTESIAN_POINT('',(148.039532308748,-118.055449513335,0.220000057710558));
#2743=CARTESIAN_POINT('',(148.952894918736,-116.076060495046,0.220000066952363));
#2744=CARTESIAN_POINT('',(150.143530052059,-114.257220595948,0.220000076873393));
#2745=CARTESIAN_POINT('',(151.585566047312,-112.635669897457,0.220000087483303));
#2746=CARTESIAN_POINT('',(153.246308380654,-111.246546708335,0.22000009877789));
#2747=CARTESIAN_POINT('',(155.088103779171,-110.119099791144,0.220000110752423));
#2748=CARTESIAN_POINT('',(157.071416337491,-109.275825219372,0.220000123413815));
#2749=CARTESIAN_POINT('',(159.15210489072,-108.734091427049,0.220000136757925));
#2750=CARTESIAN_POINT('',(161.284985087252,-108.504061752917,0.220000150786981));
#2751=CARTESIAN_POINT('',(163.424112799934,-108.589404429922,0.220000165503597));
#2752=CARTESIAN_POINT('',(165.522292530144,-108.986793585735,0.220000180901302));
#2753=CARTESIAN_POINT('',(167.535020196129,-109.686156856691,0.220000196983951));
#2754=CARTESIAN_POINT('',(169.419809233662,-110.671694822343,0.220000213758911));
#2755=CARTESIAN_POINT('',(171.134057501148,-111.919155329779,0.220000231201633));
#2756=CARTESIAN_POINT('',(172.644431183928,-113.402379207271,0.220000249342677));
#2757=CARTESIAN_POINT('',(173.917633479092,-115.087330890496,0.220000268167713));
#2758=CARTESIAN_POINT('',(174.927298593579,-116.93647433933,0.220000287675719));
#2759=CARTESIAN_POINT('',(175.652773143587,-118.908570701281,0.220000307861499));
#2760=CARTESIAN_POINT('',(176.080157387154,-120.961470177326,0.220000328735617));
#2761=CARTESIAN_POINT('',(176.201258516898,-123.05037722134,0.220000350297232));
#2762=CARTESIAN_POINT('',(176.01501182256,-125.128636000278,0.22000037253273));
#2763=CARTESIAN_POINT('',(175.526765011951,-127.153186488108,0.220000395462367));
#2764=CARTESIAN_POINT('',(174.748438070145,-129.07963296194,0.220000419076692));
#2765=CARTESIAN_POINT('',(173.69826411105,-130.866725281218,0.220000443374964));
#2766=CARTESIAN_POINT('',(172.400612208453,-132.47625934247,0.220000468351196));
#2767=CARTESIAN_POINT('',(170.883159693614,-133.875549139334,0.220000494030312));
#2768=CARTESIAN_POINT('',(169.182543860088,-135.032984944207,0.220000520365578));
#2769=CARTESIAN_POINT('',(167.333760570184,-135.926905302033,0.22000054740227));
#2770=CARTESIAN_POINT('',(165.377830458025,-136.538329794199,0.220000575131841));
#2771=CARTESIAN_POINT('',(163.359701922432,-136.855069154508,0.220000603524475));
#2772=CARTESIAN_POINT('',(161.321274083765,-136.872426453705,0.22000063260749));
#2773=CARTESIAN_POINT('',(159.305273654372,-136.590521151229,0.220000662404151));
#2774=CARTESIAN_POINT('',(157.360296129238,-136.018168938915,0.220000692834118));
#2775=CARTESIAN_POINT('',(155.521862222546,-135.167255290654,0.22000072399817));
#2776=CARTESIAN_POINT('',(153.83433728766,-134.059586125314,0.220000755810316));
#2777=CARTESIAN_POINT('',(152.330032217286,-132.718445735499,0.220000788333166));
#2778=CARTESIAN_POINT('',(151.043074997811,-131.17608483178,0.22000082151186));
#2779=CARTESIAN_POINT('',(149.998124295301,-129.464564891017,0.220000855397519));
#2780=CARTESIAN_POINT('',(149.217877316767,-127.623113912577,0.220000889957868));
#2781=CARTESIAN_POINT('',(148.717514995012,-125.691773490106,0.220000925202183));
#2782=CARTESIAN_POINT('',(148.506536743483,-123.712344524063,0.22000096113907));
#2783=CARTESIAN_POINT('',(148.588236122808,-121.728313190215,0.220000997759793));
#2784=CARTESIAN_POINT('',(148.959160420449,-119.783032682008,0.220001035054792));
#2785=CARTESIAN_POINT('',(149.610314685896,-117.916992925524,0.220001073051458));
#2786=CARTESIAN_POINT('',(150.52553228759,-116.171997776014,0.220001111710314));
#2787=CARTESIAN_POINT('',(151.684524494297,-114.583508649844,0.220001151067242));
#2788=CARTESIAN_POINT('',(153.060323003581,-113.18618519465,0.220001191098258));
#2789=CARTESIAN_POINT('',(154.623496581871,-112.008043992276,0.220001231841867));
#2790=CARTESIAN_POINT('',(156.337991866042,-111.074942437799,0.220001273258677));
#2791=CARTESIAN_POINT('',(158.164236960041,-110.405683131927,0.220001315313273));
#2792=CARTESIAN_POINT('',(160.067377102703,-110.01205146561,0.220001358123161));
#2793=CARTESIAN_POINT('',(162.00029524937,-109.902561897492,0.220001401559034));
#2794=CARTESIAN_POINT('',(163.924904787918,-110.077464837277,0.220001445709959));
#2795=CARTESIAN_POINT('',(165.798182975853,-110.531976012912,0.220001490545759));
#2796=CARTESIAN_POINT('',(167.579315963404,-111.254288015704,0.220001536048238));
#2797=CARTESIAN_POINT('',(169.2320574013,-112.228448224316,0.220001582266808));
#2798=CARTESIAN_POINT('',(170.71913927828,-113.430740707919,0.220001629136791));
#2799=CARTESIAN_POINT('',(172.011422501814,-114.835940847691,0.220001676730894));
#2800=CARTESIAN_POINT('',(173.079526951293,-116.409921517092,0.220001724955902));
#2801=CARTESIAN_POINT('',(173.903621956766,-118.120247170102,0.22000177389693));
#2802=CARTESIAN_POINT('',(174.466281341235,-119.928961498981,0.220001823538092));
#2803=CARTESIAN_POINT('',(174.756440303464,-121.794286629022,0.220001873821552));
#2804=CARTESIAN_POINT('',(174.769778995905,-123.678163825632,0.220001924815817));
#2805=CARTESIAN_POINT('',(174.507084029144,-125.538552946145,0.220001976487815));
#2806=CARTESIAN_POINT('',(173.975770981959,-127.335441637607,0.220002028835247));
#2807=CARTESIAN_POINT('',(173.187413421874,-129.032139989043,0.220002081925165));
#2808=CARTESIAN_POINT('',(172.163193346127,-130.587918419009,0.220002135602198));
#2809=CARTESIAN_POINT('',(170.922581815368,-131.975532425511,0.220002190068167));
#2810=CARTESIAN_POINT('',(169.498146089898,-133.160636519496,0.220002245113612));
#2811=CARTESIAN_POINT('',(167.917053473946,-134.122926024472,0.220002300926418));
#2812=CARTESIAN_POINT('',(166.21744202022,-134.840142482178,0.22000235738197));
#2813=CARTESIAN_POINT('',(164.435440985904,-135.29907450812,0.22000241452874));
#2814=CARTESIAN_POINT('',(162.609962649764,-135.49097049889,0.220002472369154));
#2815=CARTESIAN_POINT('',(160.780769878667,-135.412925267166,0.220002530901256));
#2816=CARTESIAN_POINT('',(158.988925976304,-135.068597322652,0.220002590072234));
#2817=CARTESIAN_POINT('',(157.269394264977,-134.465725788843,0.220002650005797));
#2818=CARTESIAN_POINT('',(155.663659687324,-133.620531268163,0.220002710531672));
#2819=CARTESIAN_POINT('',(154.201358366136,-132.550328094617,0.220002771818914));
#2820=CARTESIAN_POINT('',(152.916604460629,-131.281572685918,0.220002833737036));
#2821=CARTESIAN_POINT('',(151.833730979462,-129.840144091147,0.220002896414168));
#2822=CARTESIAN_POINT('',(150.977925021754,-128.262265338773,0.220002959670937));
#2823=CARTESIAN_POINT('',(150.363736823062,-126.578812773376,0.220003023675421));
#2824=CARTESIAN_POINT('',(150.004411331286,-124.827446473506,0.220003088389669));
#2825=CARTESIAN_POINT('',(149.906351315792,-123.04917991948,0.220003153711546));
#2826=CARTESIAN_POINT('',(150.069970597748,-121.279021368989,0.220003219775837));
#2827=CARTESIAN_POINT('',(150.490588751019,-119.557120692461,0.220003286515372));
#2828=CARTESIAN_POINT('',(151.157205060274,-117.920633429936,0.220003353915625));
#2829=CARTESIAN_POINT('',(152.054996609224,-116.402902216918,0.220003422046713));
#2830=CARTESIAN_POINT('',(153.161971888738,-115.038091663772,0.220003490812334));
#2831=CARTESIAN_POINT('',(154.454972838541,-113.852789621107,0.220003560326059));
#2832=CARTESIAN_POINT('',(155.901945336115,-112.874189068001,0.220003630424885));
#2833=CARTESIAN_POINT('',(157.474165080937,-112.119693756511,0.220003701287847));
#2834=CARTESIAN_POINT('',(159.135531358839,-111.605823308871,0.22000377283671));
#2835=CARTESIAN_POINT('',(160.848168981599,-111.342221927186,0.22000384501366));
#2836=CARTESIAN_POINT('',(162.577125517401,-111.332808007849,0.220003917917153));
#2837=CARTESIAN_POINT('',(164.283251283742,-111.576523932254,0.220003991474708));
#2838=CARTESIAN_POINT('',(165.931086676664,-112.066668502415,0.220004065737348));
#2839=CARTESIAN_POINT('',(167.485782564278,-112.79218443423,0.220004140745242));
#2840=CARTESIAN_POINT('',(168.910669690094,-113.733601488656,0.220004216305874));
#2841=CARTESIAN_POINT('',(170.180708739812,-114.87291255605,0.220004292697151));
#2842=CARTESIAN_POINT('',(171.264557953874,-116.180047346399,0.220004369622941));
#2843=CARTESIAN_POINT('',(172.143841404756,-117.630316196781,0.22000444736142));
#2844=CARTESIAN_POINT('',(172.797911274155,-119.187495702467,0.220004525679876));
#2845=CARTESIAN_POINT('',(173.215582617379,-120.820470994806,0.220004604748146));
#2846=CARTESIAN_POINT('',(173.38845213864,-122.491710315576,0.220004684477415));
#2847=CARTESIAN_POINT('',(173.314127338727,-124.166644157206,0.220004764955506));
#2848=CARTESIAN_POINT('',(172.996319758251,-125.805176179257,0.22000484598776));
#2849=CARTESIAN_POINT('',(172.441979221455,-127.377793812536,0.220004927863033));
#2850=CARTESIAN_POINT('',(171.666240113447,-128.845160388797,0.220005010281981));
#2851=CARTESIAN_POINT('',(170.685934086998,-130.179924535156,0.220005093437071));
#2852=CARTESIAN_POINT('',(169.523068592763,-131.353251644862,0.220005177316641));
#2853=CARTESIAN_POINT('',(168.20556476479,-132.339473836901,0.220005261812721));
#2854=CARTESIAN_POINT('',(166.761006380795,-133.119867927822,0.220005347044816));
#2855=CARTESIAN_POINT('',(165.222218379538,-133.677947265745,0.220005432952744));
#2856=CARTESIAN_POINT('',(163.623606671492,-134.003104239575,0.220005519507898));
#2857=CARTESIAN_POINT('',(161.998390120092,-134.08987858942,0.220005606799024));
#2858=CARTESIAN_POINT('',(160.383288020233,-133.937538724602,0.220005694752421));
#2859=CARTESIAN_POINT('',(158.812654804792,-133.550895566346,0.220005783399614));
#2860=CARTESIAN_POINT('',(157.32061855531,-132.939847353266,0.220005872712459));
#2861=CARTESIAN_POINT('',(155.938725817958,-132.11904288809,0.22000596269931));
#2862=CARTESIAN_POINT('',(154.695696379275,-131.10711648371,0.220006053392291));
#2863=CARTESIAN_POINT('',(153.617853598508,-129.927094899153,0.220006144778271));
#2864=CARTESIAN_POINT('',(152.727694319888,-128.605772255261,0.220006236836647));
#2865=CARTESIAN_POINT('',(152.043122995138,-127.171974328193,0.220006329613323));
#2866=CARTESIAN_POINT('',(151.578243679649,-125.659224005456,0.220006422992241));
#2867=CARTESIAN_POINT('',(151.340884338282,-124.098390872289,0.220006517118284));
#2868=CARTESIAN_POINT('',(151.335388162373,-122.524160945015,0.22000661194743));
#2869=CARTESIAN_POINT('',(151.56010861796,-120.9720621388,0.220006707391537));
#2870=CARTESIAN_POINT('',(152.009188061494,-119.47328184024,0.220006803587935));
#2871=CARTESIAN_POINT('',(152.671010730422,-118.061897662172,0.220006900413727));
#2872=CARTESIAN_POINT('',(153.530654678299,-116.766269285085,0.220006997982467));
#2873=CARTESIAN_POINT('',(154.56727305171,-115.615242869064,0.220007096172436));
#2874=CARTESIAN_POINT('',(155.758129111386,-114.631597095139,0.220007195072301));
#2875=CARTESIAN_POINT('',(157.076438408734,-113.835880481664,0.220007294662483));
#2876=CARTESIAN_POINT('',(158.492886317193,-113.244112208844,0.220007394939763));
#2877=CARTESIAN_POINT('',(159.976442348337,-112.867941697522,0.220007495917508));
#2878=CARTESIAN_POINT('',(161.493288836528,-112.714086293032,0.220007597514309));
#2879=CARTESIAN_POINT('',(163.013657148226,-112.784624087795,0.220007699948925));
#2880=CARTESIAN_POINT('',(164.499403926661,-113.075990105265,0.22000780285604));
#2881=CARTESIAN_POINT('',(165.924669515334,-113.581679557636,0.220007906661183));
#2882=CARTESIAN_POINT('',(167.253615168784,-114.287776094898,0.220008010969349));
#2883=CARTESIAN_POINT('',(168.461582451708,-115.17883403141,0.220008116027261));
#2884=CARTESIAN_POINT('',(169.522581038521,-116.234799207481,0.22000822182452));
#2885=CARTESIAN_POINT('',(170.413290775642,-117.429981845652,0.220008328203087));
#2886=CARTESIAN_POINT('',(171.117133041949,-118.739279808936,0.220008435320088));
#2887=CARTESIAN_POINT('',(171.619618077272,-120.134052733836,0.220008543186737));
#2888=CARTESIAN_POINT('',(171.910690528197,-121.580891772494,0.220008651599023));
#2889=CARTESIAN_POINT('',(171.98604181419,-123.052040678592,0.220008760847236));
#2890=CARTESIAN_POINT('',(171.845222167292,-124.511512974977,0.220008870630713));
#2891=CARTESIAN_POINT('',(171.492401278432,-125.931740515766,0.220008981254625));
#2892=CARTESIAN_POINT('',(170.937124341003,-127.278938406527,0.220009092458521));
#2893=CARTESIAN_POINT('',(170.19289347312,-128.525756664921,0.220009204326734));
#2894=CARTESIAN_POINT('',(169.276040013254,-129.646841498334,0.220009316960488));
#2895=CARTESIAN_POINT('',(168.208944608518,-130.617258113736,0.220009430191785));
#2896=CARTESIAN_POINT('',(167.013562854931,-131.418654163931,0.220009544234057));
#2897=CARTESIAN_POINT('',(165.719582445098,-132.032906298824,0.220009658811836));
#2898=CARTESIAN_POINT('',(164.353127590169,-132.449604483207,0.22000977416056));
#2899=CARTESIAN_POINT('',(162.944778617817,-132.660352250135,0.220009890219817));
#2900=CARTESIAN_POINT('',(161.526732669803,-132.662129584053,0.220010006869267));
#2901=CARTESIAN_POINT('',(160.127373868845,-132.456310326153,0.220010124300507));
#2902=CARTESIAN_POINT('',(158.778233905914,-132.048527381667,0.220010242399423));
#2903=CARTESIAN_POINT('',(157.509050952861,-131.449841911806,0.22001036107667));
#2904=CARTESIAN_POINT('',(156.343877986949,-130.672803232512,0.220010480618843));
#2905=CARTESIAN_POINT('',(155.310615927105,-129.737782495695,0.220010600662606));
#2906=CARTESIAN_POINT('',(154.427959454121,-128.664038738626,0.2200107215032));
#2907=CARTESIAN_POINT('',(153.715277067261,-127.47681580806,0.220010842989545));
#2908=CARTESIAN_POINT('',(153.186333865318,-126.202075207289,0.22001096517941));
#2909=CARTESIAN_POINT('',(152.851505553824,-124.868116557944,0.220011088055847));
#2910=CARTESIAN_POINT('',(152.716686302418,-123.504645413065,0.220011211590837));
#2911=CARTESIAN_POINT('',(152.783163591319,-122.141114495217,0.220011335800114));
#2912=CARTESIAN_POINT('',(153.048379271322,-120.806055960717,0.220011460772759));
#2913=CARTESIAN_POINT('',(153.504749479942,-119.529945277432,0.220011586332062));
#2914=CARTESIAN_POINT('',(154.141442832108,-118.338387361079,0.22001171262704));
#2915=CARTESIAN_POINT('',(154.943428724661,-117.256991410137,0.220011839615346));
#2916=CARTESIAN_POINT('',(155.892371134606,-116.30837250087,0.220011967324198));
#2917=CARTESIAN_POINT('',(156.965302253247,-115.512994346356,0.220012095592053));
#2918=CARTESIAN_POINT('',(158.139962332039,-114.885503610372,0.220012224643843));
#2919=CARTESIAN_POINT('',(159.388919592016,-114.439095755474,0.220012354322745));
#2920=CARTESIAN_POINT('',(160.68582017601,-114.181687057582,0.220012484754065));
#2921=CARTESIAN_POINT('',(162.000939886623,-114.11777906744,0.220012615795399));
#2922=CARTESIAN_POINT('',(163.306826577791,-114.247143036641,0.220012747566031));
#2923=CARTESIAN_POINT('',(164.57554320694,-114.565969556673,0.220012880102368));
#2924=CARTESIAN_POINT('',(165.778149374236,-115.065398803336,0.220013013211808));
#2925=CARTESIAN_POINT('',(166.890109550927,-115.733207778263,0.220013146978055));
#2926=CARTESIAN_POINT('',(167.888937542184,-116.554603106601,0.220013281526819));
#2927=CARTESIAN_POINT('',(168.752501705506,-117.509417678696,0.220013416655491));
#2928=CARTESIAN_POINT('',(169.46458786198,-118.57793004259,0.220013552621788));
#2929=CARTESIAN_POINT('',(170.009206871208,-119.733411458392,0.220013689086853));
#2930=CARTESIAN_POINT('',(170.377306363531,-120.952821543656,0.220013826370014));
#2931=CARTESIAN_POINT('',(170.561528585006,-122.207514059428,0.220013964254915));
#2932=CARTESIAN_POINT('',(170.559608742975,-123.471431661331,0.22001410289145));
#2933=CARTESIAN_POINT('',(170.372802960501,-124.716624901691,0.220014242214685));
#2934=CARTESIAN_POINT('',(170.006456162447,-125.916361959694,0.220014382232357));
#2935=CARTESIAN_POINT('',(169.470603753163,-127.043890022762,0.220014522802147));
#2936=CARTESIAN_POINT('',(168.776672559065,-128.077966187357,0.220014664267092));
#2937=CARTESIAN_POINT('',(167.942809472905,-128.994010164231,0.220014806218711));
#2938=CARTESIAN_POINT('',(166.986942075924,-129.775130879485,0.220014948916702));
#2939=CARTESIAN_POINT('',(165.93027261825,-130.405218995686,0.220015092375649));
#2940=CARTESIAN_POINT('',(164.797832728855,-130.871144238723,0.220015236410261));
#2941=CARTESIAN_POINT('',(163.613467635603,-131.164769971629,0.220015381185936));
#2942=CARTESIAN_POINT('',(162.40331102434,-131.280756240587,0.220015526695517));
#2943=CARTESIAN_POINT('',(161.194912028234,-131.218130785522,0.220015672791289));
#2944=CARTESIAN_POINT('',(160.012669612113,-130.979528301977,0.220015819683546));
#2945=CARTESIAN_POINT('',(158.883639368502,-130.571819320511,0.22001596715461));
#2946=CARTESIAN_POINT('',(157.830607272894,-130.004928053184,0.220016115353818));
#2947=CARTESIAN_POINT('',(156.875986753603,-129.292320145423,0.220016264250213));
#2948=CARTESIAN_POINT('',(156.039663917597,-128.450456412315,0.220016413871161));
#2949=CARTESIAN_POINT('',(155.339477129018,-127.499578514124,0.220016564060486));
#2950=CARTESIAN_POINT('',(154.788662026523,-126.460581901977,0.220016714930067));
#2951=CARTESIAN_POINT('',(154.397695913557,-125.355790202675,0.220016866585439));
#2952=CARTESIAN_POINT('',(154.174209434544,-124.210161862264,0.220017018942165));
#2953=CARTESIAN_POINT('',(154.121594047558,-123.049893595707,0.220017171854041));
#2954=CARTESIAN_POINT('',(154.239463890333,-121.898424379538,0.220017325565007));
#2955=CARTESIAN_POINT('',(154.524191589756,-120.781133649312,0.220017480018551));
#2956=CARTESIAN_POINT('',(154.967675208124,-119.723149261022,0.220017635028618));
#2957=CARTESIAN_POINT('',(155.559114995347,-118.745878250753,0.22001779072022));
#2958=CARTESIAN_POINT('',(156.284517143214,-117.869752443721,0.220017947092307));
#2959=CARTESIAN_POINT('',(157.127464207909,-117.112499831169,0.220018104214369));
#2960=CARTESIAN_POINT('',(158.068911504292,-116.48979204404,0.220018262080141));
#2961=CARTESIAN_POINT('',(159.085960677573,-116.014697685116,0.220018420448103));
#2962=CARTESIAN_POINT('',(160.158003733968,-115.69514526708,0.220018579640576));
#2963=CARTESIAN_POINT('',(161.260071289721,-115.537309081747,0.220018739448709));
#2964=CARTESIAN_POINT('',(162.368438469801,-115.542865655436,0.220018899926141));
#2965=CARTESIAN_POINT('',(163.460413378962,-115.710635397279,0.22001906126617));
#2966=CARTESIAN_POINT('',(164.510432324594,-116.035481403098,0.220019223163324));
#2967=CARTESIAN_POINT('',(165.495848885201,-116.50807868315,0.220019385539857));
#2968=CARTESIAN_POINT('',(166.399470132583,-117.119207379754,0.220019549034562));
#2969=CARTESIAN_POINT('',(167.198101866427,-117.851610468872,0.220019712853329));
#2970=CARTESIAN_POINT('',(167.878136393236,-118.690079517114,0.220019877477928));
#2971=CARTESIAN_POINT('',(168.425202314903,-119.615338938575,0.22002004280802));
#2972=CARTESIAN_POINT('',(168.828514266583,-120.605976927546,0.22002020874425));
#2973=CARTESIAN_POINT('',(169.080995271661,-121.641150590768,0.22002037548017));
#2974=CARTESIAN_POINT('',(169.178156393372,-122.697183004518,0.220020542884501));
#2975=CARTESIAN_POINT('',(169.119442385601,-123.750884492998,0.22002071092937));
#2976=CARTESIAN_POINT('',(168.907770216509,-124.779353691622,0.220020879584474));
#2977=CARTESIAN_POINT('',(168.548832961177,-125.761686926433,0.220021049030232));
#2978=CARTESIAN_POINT('',(168.051672184028,-126.676603244028,0.220021219196403));
#2979=CARTESIAN_POINT('',(167.428280653736,-127.504672341458,0.220021390050771));
#2980=CARTESIAN_POINT('',(166.694599515369,-128.227884200604,0.220021561356897));
#2981=CARTESIAN_POINT('',(165.864940908625,-128.83377717319,0.220021733689305));
#2982=CARTESIAN_POINT('',(164.961292938082,-129.308097548337,0.220021906380458));
#2983=CARTESIAN_POINT('',(164.000827842292,-129.64351432694,0.220022080032404));
#2984=CARTESIAN_POINT('',(163.008033881745,-129.833056117806,0.220022254068133));
#2985=CARTESIAN_POINT('',(162.33454480292,-129.860851474757,0.220022371111234));
#2986=CARTESIAN_POINT('',(162.000527127788,-129.849898205534,0.220022429586578));
#2987=CARTESIAN_POINT('',(162.000527127788,-129.849898205534,0.220022429586578));
#2988=CARTESIAN_POINT('',(162.000527127788,-129.849898205534,0.));
#2989=CARTESIAN_POINT('',(162.,-138.25,0.));
#2990=CARTESIAN_POINT('',(161.256093800753,-138.238980560157,0.));
#2991=CARTESIAN_POINT('',(160.138104488042,-138.13981965863,0.));
#2992=CARTESIAN_POINT('',(158.677895762533,-137.846393534278,0.));
#2993=CARTESIAN_POINT('',(157.245508768744,-137.446144657727,0.));
#2994=CARTESIAN_POINT('',(155.520586872203,-136.751183810633,0.));
#2995=CARTESIAN_POINT('',(153.598487074189,-135.625059696191,0.));
#2996=CARTESIAN_POINT('',(151.866708262255,-134.231961369766,0.));
#2997=CARTESIAN_POINT('',(150.360236574877,-132.602196663604,0.));
#2998=CARTESIAN_POINT('',(149.113438568196,-130.774756212837,0.));
#2999=CARTESIAN_POINT('',(148.149917787688,-128.788007089964,0.));
#3000=CARTESIAN_POINT('',(147.489673267491,-126.684735236932,0.));
#3001=CARTESIAN_POINT('',(147.146222853903,-124.51387073627,0.));
#3002=CARTESIAN_POINT('',(147.125143020994,-122.318941224846,0.));
#3003=CARTESIAN_POINT('',(147.425569441703,-120.151542881184,0.));
#3004=CARTESIAN_POINT('',(148.039532308748,-118.055449513335,0.));
#3005=CARTESIAN_POINT('',(148.952894918736,-116.076060495046,0.));
#3006=CARTESIAN_POINT('',(150.143530052059,-114.257220595948,0.));
#3007=CARTESIAN_POINT('',(151.585566047312,-112.635669897457,0.));
#3008=CARTESIAN_POINT('',(153.246308380654,-111.246546708335,0.));
#3009=CARTESIAN_POINT('',(155.088103779171,-110.119099791144,0.));
#3010=CARTESIAN_POINT('',(157.071416337491,-109.275825219372,0.));
#3011=CARTESIAN_POINT('',(159.15210489072,-108.734091427049,0.));
#3012=CARTESIAN_POINT('',(161.284985087252,-108.504061752917,0.));
#3013=CARTESIAN_POINT('',(163.424112799934,-108.589404429922,0.));
#3014=CARTESIAN_POINT('',(165.522292530144,-108.986793585735,0.));
#3015=CARTESIAN_POINT('',(167.535020196129,-109.686156856691,0.));
#3016=CARTESIAN_POINT('',(169.419809233662,-110.671694822343,0.));
#3017=CARTESIAN_POINT('',(171.134057501148,-111.919155329779,0.));
#3018=CARTESIAN_POINT('',(172.644431183928,-113.402379207271,0.));
#3019=CARTESIAN_POINT('',(173.917633479092,-115.087330890496,0.));
#3020=CARTESIAN_POINT('',(174.927298593579,-116.93647433933,0.));
#3021=CARTESIAN_POINT('',(175.652773143587,-118.908570701281,0.));
#3022=CARTESIAN_POINT('',(176.080157387154,-120.961470177326,0.));
#3023=CARTESIAN_POINT('',(176.201258516898,-123.05037722134,0.));
#3024=CARTESIAN_POINT('',(176.01501182256,-125.128636000278,0.));
#3025=CARTESIAN_POINT('',(175.526765011951,-127.153186488108,0.));
#3026=CARTESIAN_POINT('',(174.748438070145,-129.07963296194,0.));
#3027=CARTESIAN_POINT('',(173.69826411105,-130.866725281218,0.));
#3028=CARTESIAN_POINT('',(172.400612208453,-132.47625934247,0.));
#3029=CARTESIAN_POINT('',(170.883159693614,-133.875549139334,0.));
#3030=CARTESIAN_POINT('',(169.182543860088,-135.032984944207,0.));
#3031=CARTESIAN_POINT('',(167.333760570184,-135.926905302033,0.));
#3032=CARTESIAN_POINT('',(165.377830458025,-136.538329794199,0.));
#3033=CARTESIAN_POINT('',(163.359701922432,-136.855069154508,0.));
#3034=CARTESIAN_POINT('',(161.321274083765,-136.872426453705,0.));
#3035=CARTESIAN_POINT('',(159.305273654372,-136.590521151229,0.));
#3036=CARTESIAN_POINT('',(157.360296129238,-136.018168938915,0.));
#3037=CARTESIAN_POINT('',(155.521862222546,-135.167255290654,0.));
#3038=CARTESIAN_POINT('',(153.83433728766,-134.059586125314,0.));
#3039=CARTESIAN_POINT('',(152.330032217286,-132.718445735499,0.));
#3040=CARTESIAN_POINT('',(151.043074997811,-131.17608483178,0.));
#3041=CARTESIAN_POINT('',(149.998124295301,-129.464564891017,0.));
#3042=CARTESIAN_POINT('',(149.217877316767,-127.623113912577,0.));
#3043=CARTESIAN_POINT('',(148.717514995012,-125.691773490106,0.));
#3044=CARTESIAN_POINT('',(148.506536743483,-123.712344524063,0.));
#3045=CARTESIAN_POINT('',(148.588236122808,-121.728313190215,0.));
#3046=CARTESIAN_POINT('',(148.959160420449,-119.783032682008,0.));
#3047=CARTESIAN_POINT('',(149.610314685896,-117.916992925524,0.));
#3048=CARTESIAN_POINT('',(150.52553228759,-116.171997776014,0.));
#3049=CARTESIAN_POINT('',(151.684524494297,-114.583508649844,0.));
#3050=CARTESIAN_POINT('',(153.060323003581,-113.18618519465,0.));
#3051=CARTESIAN_POINT('',(154.623496581871,-112.008043992276,0.));
#3052=CARTESIAN_POINT('',(156.337991866042,-111.074942437799,0.));
#3053=CARTESIAN_POINT('',(158.164236960041,-110.405683131927,0.));
#3054=CARTESIAN_POINT('',(160.067377102703,-110.01205146561,0.));
#3055=CARTESIAN_POINT('',(162.00029524937,-109.902561897492,0.));
#3056=CARTESIAN_POINT('',(163.924904787918,-110.077464837277,0.));
#3057=CARTESIAN_POINT('',(165.798182975853,-110.531976012912,0.));
#3058=CARTESIAN_POINT('',(167.579315963404,-111.254288015704,0.));
#3059=CARTESIAN_POINT('',(169.2320574013,-112.228448224316,0.));
#3060=CARTESIAN_POINT('',(170.71913927828,-113.430740707919,0.));
#3061=CARTESIAN_POINT('',(172.011422501814,-114.835940847691,0.));
#3062=CARTESIAN_POINT('',(173.079526951293,-116.409921517092,0.));
#3063=CARTESIAN_POINT('',(173.903621956766,-118.120247170102,0.));
#3064=CARTESIAN_POINT('',(174.466281341235,-119.928961498981,0.));
#3065=CARTESIAN_POINT('',(174.756440303464,-121.794286629022,0.));
#3066=CARTESIAN_POINT('',(174.769778995905,-123.678163825632,0.));
#3067=CARTESIAN_POINT('',(174.507084029144,-125.538552946145,0.));
#3068=CARTESIAN_POINT('',(173.975770981959,-127.335441637607,0.));
#3069=CARTESIAN_POINT('',(173.187413421874,-129.032139989043,0.));
#3070=CARTESIAN_POINT('',(172.163193346127,-130.587918419009,0.));
#3071=CARTESIAN_POINT('',(170.922581815368,-131.975532425511,0.));
#3072=CARTESIAN_POINT('',(169.498146089898,-133.160636519496,0.));
#3073=CARTESIAN_POINT('',(167.917053473946,-134.122926024472,0.));
#3074=CARTESIAN_POINT('',(166.21744202022,-134.840142482178,0.));
#3075=CARTESIAN_POINT('',(164.435440985904,-135.29907450812,0.));
#3076=CARTESIAN_POINT('',(162.609962649764,-135.49097049889,0.));
#3077=CARTESIAN_POINT('',(160.780769878667,-135.412925267166,0.));
#3078=CARTESIAN_POINT('',(158.988925976304,-135.068597322652,0.));
#3079=CARTESIAN_POINT('',(157.269394264977,-134.465725788843,0.));
#3080=CARTESIAN_POINT('',(155.663659687324,-133.620531268163,0.));
#3081=CARTESIAN_POINT('',(154.201358366136,-132.550328094617,0.));
#3082=CARTESIAN_POINT('',(152.916604460629,-131.281572685918,0.));
#3083=CARTESIAN_POINT('',(151.833730979462,-129.840144091147,0.));
#3084=CARTESIAN_POINT('',(150.977925021754,-128.262265338773,0.));
#3085=CARTESIAN_POINT('',(150.363736823062,-126.578812773376,0.));
#3086=CARTESIAN_POINT('',(150.004411331286,-124.827446473506,0.));
#3087=CARTESIAN_POINT('',(149.906351315792,-123.04917991948,0.));
#3088=CARTESIAN_POINT('',(150.069970597748,-121.279021368989,0.));
#3089=CARTESIAN_POINT('',(150.490588751019,-119.557120692461,0.));
#3090=CARTESIAN_POINT('',(151.157205060274,-117.920633429936,0.));
#3091=CARTESIAN_POINT('',(152.054996609224,-116.402902216918,0.));
#3092=CARTESIAN_POINT('',(153.161971888738,-115.038091663772,0.));
#3093=CARTESIAN_POINT('',(154.454972838541,-113.852789621107,0.));
#3094=CARTESIAN_POINT('',(155.901945336115,-112.874189068001,0.));
#3095=CARTESIAN_POINT('',(157.474165080937,-112.119693756511,0.));
#3096=CARTESIAN_POINT('',(159.135531358839,-111.605823308871,0.));
#3097=CARTESIAN_POINT('',(160.848168981599,-111.342221927186,0.));
#3098=CARTESIAN_POINT('',(162.577125517401,-111.332808007849,0.));
#3099=CARTESIAN_POINT('',(164.283251283742,-111.576523932254,0.));
#3100=CARTESIAN_POINT('',(165.931086676664,-112.066668502415,0.));
#3101=CARTESIAN_POINT('',(167.485782564278,-112.79218443423,0.));
#3102=CARTESIAN_POINT('',(168.910669690094,-113.733601488656,0.));
#3103=CARTESIAN_POINT('',(170.180708739812,-114.87291255605,0.));
#3104=CARTESIAN_POINT('',(171.264557953874,-116.180047346399,0.));
#3105=CARTESIAN_POINT('',(172.143841404756,-117.630316196781,0.));
#3106=CARTESIAN_POINT('',(172.797911274155,-119.187495702467,0.));
#3107=CARTESIAN_POINT('',(173.215582617379,-120.820470994806,0.));
#3108=CARTESIAN_POINT('',(173.38845213864,-122.491710315576,0.));
#3109=CARTESIAN_POINT('',(173.314127338727,-124.166644157206,0.));
#3110=CARTESIAN_POINT('',(172.996319758251,-125.805176179257,0.));
#3111=CARTESIAN_POINT('',(172.441979221455,-127.377793812536,0.));
#3112=CARTESIAN_POINT('',(171.666240113447,-128.845160388797,0.));
#3113=CARTESIAN_POINT('',(170.685934086998,-130.179924535156,0.));
#3114=CARTESIAN_POINT('',(169.523068592763,-131.353251644862,0.));
#3115=CARTESIAN_POINT('',(168.20556476479,-132.339473836901,0.));
#3116=CARTESIAN_POINT('',(166.761006380795,-133.119867927822,0.));
#3117=CARTESIAN_POINT('',(165.222218379538,-133.677947265745,0.));
#3118=CARTESIAN_POINT('',(163.623606671492,-134.003104239575,0.));
#3119=CARTESIAN_POINT('',(161.998390120092,-134.08987858942,0.));
#3120=CARTESIAN_POINT('',(160.383288020233,-133.937538724602,0.));
#3121=CARTESIAN_POINT('',(158.812654804792,-133.550895566346,0.));
#3122=CARTESIAN_POINT('',(157.32061855531,-132.939847353266,0.));
#3123=CARTESIAN_POINT('',(155.938725817958,-132.11904288809,0.));
#3124=CARTESIAN_POINT('',(154.695696379275,-131.10711648371,0.));
#3125=CARTESIAN_POINT('',(153.617853598508,-129.927094899153,0.));
#3126=CARTESIAN_POINT('',(152.727694319888,-128.605772255261,0.));
#3127=CARTESIAN_POINT('',(152.043122995138,-127.171974328193,0.));
#3128=CARTESIAN_POINT('',(151.578243679649,-125.659224005456,0.));
#3129=CARTESIAN_POINT('',(151.340884338282,-124.098390872289,0.));
#3130=CARTESIAN_POINT('',(151.335388162373,-122.524160945015,0.));
#3131=CARTESIAN_POINT('',(151.56010861796,-120.9720621388,0.));
#3132=CARTESIAN_POINT('',(152.009188061494,-119.47328184024,0.));
#3133=CARTESIAN_POINT('',(152.671010730422,-118.061897662172,0.));
#3134=CARTESIAN_POINT('',(153.530654678299,-116.766269285085,0.));
#3135=CARTESIAN_POINT('',(154.56727305171,-115.615242869064,0.));
#3136=CARTESIAN_POINT('',(155.758129111386,-114.631597095139,0.));
#3137=CARTESIAN_POINT('',(157.076438408734,-113.835880481664,0.));
#3138=CARTESIAN_POINT('',(158.492886317193,-113.244112208844,0.));
#3139=CARTESIAN_POINT('',(159.976442348337,-112.867941697522,0.));
#3140=CARTESIAN_POINT('',(161.493288836528,-112.714086293032,0.));
#3141=CARTESIAN_POINT('',(163.013657148226,-112.784624087795,0.));
#3142=CARTESIAN_POINT('',(164.499403926661,-113.075990105265,0.));
#3143=CARTESIAN_POINT('',(165.924669515334,-113.581679557636,0.));
#3144=CARTESIAN_POINT('',(167.253615168784,-114.287776094898,0.));
#3145=CARTESIAN_POINT('',(168.461582451708,-115.17883403141,0.));
#3146=CARTESIAN_POINT('',(169.522581038521,-116.234799207481,0.));
#3147=CARTESIAN_POINT('',(170.413290775642,-117.429981845652,0.));
#3148=CARTESIAN_POINT('',(171.117133041949,-118.739279808936,0.));
#3149=CARTESIAN_POINT('',(171.619618077272,-120.134052733836,0.));
#3150=CARTESIAN_POINT('',(171.910690528197,-121.580891772494,0.));
#3151=CARTESIAN_POINT('',(171.98604181419,-123.052040678592,0.));
#3152=CARTESIAN_POINT('',(171.845222167292,-124.511512974977,0.));
#3153=CARTESIAN_POINT('',(171.492401278432,-125.931740515766,0.));
#3154=CARTESIAN_POINT('',(170.937124341003,-127.278938406527,0.));
#3155=CARTESIAN_POINT('',(170.19289347312,-128.525756664921,0.));
#3156=CARTESIAN_POINT('',(169.276040013254,-129.646841498334,0.));
#3157=CARTESIAN_POINT('',(168.208944608518,-130.617258113736,0.));
#3158=CARTESIAN_POINT('',(167.013562854931,-131.418654163931,0.));
#3159=CARTESIAN_POINT('',(165.719582445098,-132.032906298824,0.));
#3160=CARTESIAN_POINT('',(164.353127590169,-132.449604483207,0.));
#3161=CARTESIAN_POINT('',(162.944778617817,-132.660352250135,0.));
#3162=CARTESIAN_POINT('',(161.526732669803,-132.662129584053,0.));
#3163=CARTESIAN_POINT('',(160.127373868845,-132.456310326153,0.));
#3164=CARTESIAN_POINT('',(158.778233905914,-132.048527381667,0.));
#3165=CARTESIAN_POINT('',(157.509050952861,-131.449841911806,0.));
#3166=CARTESIAN_POINT('',(156.343877986949,-130.672803232512,0.));
#3167=CARTESIAN_POINT('',(155.310615927105,-129.737782495695,0.));
#3168=CARTESIAN_POINT('',(154.427959454121,-128.664038738626,0.));
#3169=CARTESIAN_POINT('',(153.715277067261,-127.47681580806,0.));
#3170=CARTESIAN_POINT('',(153.186333865318,-126.202075207289,0.));
#3171=CARTESIAN_POINT('',(152.851505553824,-124.868116557944,0.));
#3172=CARTESIAN_POINT('',(152.716686302418,-123.504645413065,0.));
#3173=CARTESIAN_POINT('',(152.783163591319,-122.141114495217,0.));
#3174=CARTESIAN_POINT('',(153.048379271322,-120.806055960717,0.));
#3175=CARTESIAN_POINT('',(153.504749479942,-119.529945277432,0.));
#3176=CARTESIAN_POINT('',(154.141442832108,-118.338387361079,0.));
#3177=CARTESIAN_POINT('',(154.943428724661,-117.256991410137,0.));
#3178=CARTESIAN_POINT('',(155.892371134606,-116.30837250087,0.));
#3179=CARTESIAN_POINT('',(156.965302253247,-115.512994346356,0.));
#3180=CARTESIAN_POINT('',(158.139962332039,-114.885503610372,0.));
#3181=CARTESIAN_POINT('',(159.388919592016,-114.439095755474,0.));
#3182=CARTESIAN_POINT('',(160.68582017601,-114.181687057582,0.));
#3183=CARTESIAN_POINT('',(162.000939886623,-114.11777906744,0.));
#3184=CARTESIAN_POINT('',(163.306826577791,-114.247143036641,0.));
#3185=CARTESIAN_POINT('',(164.57554320694,-114.565969556673,0.));
#3186=CARTESIAN_POINT('',(165.778149374236,-115.065398803336,0.));
#3187=CARTESIAN_POINT('',(166.890109550927,-115.733207778263,0.));
#3188=CARTESIAN_POINT('',(167.888937542184,-116.554603106601,0.));
#3189=CARTESIAN_POINT('',(168.752501705506,-117.509417678696,0.));
#3190=CARTESIAN_POINT('',(169.46458786198,-118.57793004259,0.));
#3191=CARTESIAN_POINT('',(170.009206871208,-119.733411458392,0.));
#3192=CARTESIAN_POINT('',(170.377306363531,-120.952821543656,0.));
#3193=CARTESIAN_POINT('',(170.561528585006,-122.207514059428,0.));
#3194=CARTESIAN_POINT('',(170.559608742975,-123.471431661331,0.));
#3195=CARTESIAN_POINT('',(170.372802960501,-124.716624901691,0.));
#3196=CARTESIAN_POINT('',(170.006456162447,-125.916361959694,0.));
#3197=CARTESIAN_POINT('',(169.470603753163,-127.043890022762,0.));
#3198=CARTESIAN_POINT('',(168.776672559065,-128.077966187357,0.));
#3199=CARTESIAN_POINT('',(167.942809472905,-128.994010164231,0.));
#3200=CARTESIAN_POINT('',(166.986942075924,-129.775130879485,0.));
#3201=CARTESIAN_POINT('',(165.93027261825,-130.405218995686,0.));
#3202=CARTESIAN_POINT('',(164.797832728855,-130.871144238723,0.));
#3203=CARTESIAN_POINT('',(163.613467635603,-131.164769971629,0.));
#3204=CARTESIAN_POINT('',(162.40331102434,-131.280756240587,0.));
#3205=CARTESIAN_POINT('',(161.194912028234,-131.218130785522,0.));
#3206=CARTESIAN_POINT('',(160.012669612113,-130.979528301977,0.));
#3207=CARTESIAN_POINT('',(158.883639368502,-130.571819320511,0.));
#3208=CARTESIAN_POINT('',(157.830607272894,-130.004928053184,0.));
#3209=CARTESIAN_POINT('',(156.875986753603,-129.292320145423,0.));
#3210=CARTESIAN_POINT('',(156.039663917597,-128.450456412315,0.));
#3211=CARTESIAN_POINT('',(155.339477129018,-127.499578514124,0.));
#3212=CARTESIAN_POINT('',(154.788662026523,-126.460581901977,0.));
#3213=CARTESIAN_POINT('',(154.397695913557,-125.355790202675,0.));
#3214=CARTESIAN_POINT('',(154.174209434544,-124.210161862264,0.));
#3215=CARTESIAN_POINT('',(154.121594047558,-123.049893595707,0.));
#3216=CARTESIAN_POINT('',(154.239463890333,-121.898424379538,0.));
#3217=CARTESIAN_POINT('',(154.524191589756,-120.781133649312,0.));
#3218=CARTESIAN_POINT('',(154.967675208124,-119.723149261022,0.));
#3219=CARTESIAN_POINT('',(155.559114995347,-118.745878250753,0.));
#3220=CARTESIAN_POINT('',(156.284517143214,-117.869752443721,0.));
#3221=CARTESIAN_POINT('',(157.127464207909,-117.112499831169,0.));
#3222=CARTESIAN_POINT('',(158.068911504292,-116.48979204404,0.));
#3223=CARTESIAN_POINT('',(159.085960677573,-116.014697685116,0.));
#3224=CARTESIAN_POINT('',(160.158003733968,-115.69514526708,0.));
#3225=CARTESIAN_POINT('',(161.260071289721,-115.537309081747,0.));
#3226=CARTESIAN_POINT('',(162.368438469801,-115.542865655436,0.));
#3227=CARTESIAN_POINT('',(163.460413378962,-115.710635397279,0.));
#3228=CARTESIAN_POINT('',(164.510432324594,-116.035481403098,0.));
#3229=CARTESIAN_POINT('',(165.495848885201,-116.50807868315,0.));
#3230=CARTESIAN_POINT('',(166.399470132583,-117.119207379754,0.));
#3231=CARTESIAN_POINT('',(167.198101866427,-117.851610468872,0.));
#3232=CARTESIAN_POINT('',(167.878136393236,-118.690079517114,0.));
#3233=CARTESIAN_POINT('',(168.425202314903,-119.615338938575,0.));
#3234=CARTESIAN_POINT('',(168.828514266583,-120.605976927546,0.));
#3235=CARTESIAN_POINT('',(169.080995271661,-121.641150590768,0.));
#3236=CARTESIAN_POINT('',(169.178156393372,-122.697183004518,0.));
#3237=CARTESIAN_POINT('',(169.119442385601,-123.750884492998,0.));
#3238=CARTESIAN_POINT('',(168.907770216509,-124.779353691622,0.));
#3239=CARTESIAN_POINT('',(168.548832961177,-125.761686926433,0.));
#3240=CARTESIAN_POINT('',(168.051672184028,-126.676603244028,0.));
#3241=CARTESIAN_POINT('',(167.428280653736,-127.504672341458,0.));
#3242=CARTESIAN_POINT('',(166.694599515369,-128.227884200604,0.));
#3243=CARTESIAN_POINT('',(165.864940908625,-128.83377717319,0.));
#3244=CARTESIAN_POINT('',(164.961292938082,-129.308097548337,0.));
#3245=CARTESIAN_POINT('',(164.000827842292,-129.64351432694,0.));
#3246=CARTESIAN_POINT('',(163.008033881745,-129.833056117806,0.));
#3247=CARTESIAN_POINT('',(162.33454480292,-129.860851474757,0.));
#3248=CARTESIAN_POINT('',(162.000527127788,-129.849898205534,0.));
#3249=CARTESIAN_POINT('',(162.000527127788,-129.849898205534,0.));
#3250=CARTESIAN_POINT('',(162.,-130.85,0.));
#3251=CARTESIAN_POINT('',(162.,-130.85,0.));
#3252=CARTESIAN_POINT('',(162.,-130.85,0.160016312426602));
#3253=CARTESIAN_POINT('',(162.000527127788,-129.849898205534,0.220022429586578));
#3254=CARTESIAN_POINT('',(161.635547643443,-129.850311432604,0.22002043915307));
#3255=CARTESIAN_POINT('',(161.074355329743,-129.742535895896,0.220017802303578));
#3256=CARTESIAN_POINT('',(160.397210302612,-129.390998278567,0.220014755576044));
#3257=CARTESIAN_POINT('',(159.932427490203,-129.01292313013,0.220012587643228));
#3258=CARTESIAN_POINT('',(159.556168430294,-128.548490835895,0.220010589972183));
#3259=CARTESIAN_POINT('',(159.204987600272,-127.868979997246,0.220008232718264));
#3260=CARTESIAN_POINT('',(159.030201912955,-126.943491529793,0.220005478992464));
#3261=CARTESIAN_POINT('',(159.209457054138,-126.017470008749,0.220003374732656));
#3262=CARTESIAN_POINT('',(159.562893558123,-125.341138251156,0.220002156364478));
#3263=CARTESIAN_POINT('',(159.942101038678,-124.877277066451,0.220001371803693));
#3264=CARTESIAN_POINT('',(160.407397494808,-124.50213246012,0.22000076568794));
#3265=CARTESIAN_POINT('',(161.088225556626,-124.152667005878,0.220000196638379));
#3266=CARTESIAN_POINT('',(161.647950614644,-124.04802678456,0.220000001509919));
#3267=CARTESIAN_POINT('',(162.013752830093,-124.04990542536,0.22));
#3268=CARTESIAN_POINT('',(162.000527127788,-129.849898205534,0.));
#3269=CARTESIAN_POINT('',(161.635547643443,-129.850311432604,0.));
#3270=CARTESIAN_POINT('',(161.074355329743,-129.742535895896,0.));
#3271=CARTESIAN_POINT('',(160.397210302612,-129.390998278567,0.));
#3272=CARTESIAN_POINT('',(159.932427490203,-129.01292313013,0.));
#3273=CARTESIAN_POINT('',(159.556168430294,-128.548490835895,0.));
#3274=CARTESIAN_POINT('',(159.204987600272,-127.868979997246,0.));
#3275=CARTESIAN_POINT('',(159.030201912955,-126.943491529793,0.));
#3276=CARTESIAN_POINT('',(159.209457054138,-126.017470008749,0.));
#3277=CARTESIAN_POINT('',(159.562893558123,-125.341138251156,0.));
#3278=CARTESIAN_POINT('',(159.942101038678,-124.877277066451,0.));
#3279=CARTESIAN_POINT('',(160.407397494808,-124.50213246012,0.));
#3280=CARTESIAN_POINT('',(161.088225556626,-124.152667005878,0.));
#3281=CARTESIAN_POINT('',(161.647950614644,-124.04802678456,0.));
#3282=CARTESIAN_POINT('',(162.013752830093,-124.04990542536,0.));
#3283=CARTESIAN_POINT('',(162.,-130.85,0.));
#3284=CARTESIAN_POINT('',(161.510002422,-130.850453980597,0.));
#3285=CARTESIAN_POINT('',(160.756506199041,-130.705855583619,0.));
#3286=CARTESIAN_POINT('',(159.846965279078,-130.234329848762,0.));
#3287=CARTESIAN_POINT('',(159.222393495473,-129.727181501607,0.));
#3288=CARTESIAN_POINT('',(158.716405878601,-129.104127919788,0.));
#3289=CARTESIAN_POINT('',(158.243493347309,-128.192371159267,0.));
#3290=CARTESIAN_POINT('',(158.006453341984,-126.950349814647,0.));
#3291=CARTESIAN_POINT('',(158.24389084313,-125.706554177015,0.));
#3292=CARTESIAN_POINT('',(158.715714270387,-124.796955124877,0.));
#3293=CARTESIAN_POINT('',(159.22282970679,-124.172399444749,0.));
#3294=CARTESIAN_POINT('',(159.8457831802,-123.666392898521,0.));
#3295=CARTESIAN_POINT('',(160.758095189739,-123.193556436559,0.));
#3296=CARTESIAN_POINT('',(161.508929578691,-123.049790797953,0.));
#3297=CARTESIAN_POINT('',(162.,-123.05,0.));
#3298=CARTESIAN_POINT('',(162.,-139.,0.));
#3299=CARTESIAN_POINT('',(162.,-138.25,0.));
#3300=CARTESIAN_POINT('',(161.021593720196,-139.20670080577,0.160000000000911));
#3301=CARTESIAN_POINT('',(160.555396334992,-139.171934706296,0.160000000003217));
#3302=CARTESIAN_POINT('',(159.695774486399,-139.070379518917,0.160000000006518));
#3303=CARTESIAN_POINT('',(158.458674979457,-138.823011840829,0.159999999940163));
#3304=CARTESIAN_POINT('',(156.930969031661,-138.397599241145,0.160000000334769));
#3305=CARTESIAN_POINT('',(155.091636869023,-137.658492417042,0.159999998618187));
#3306=CARTESIAN_POINT('',(153.041136435943,-136.45968992295,0.16000000484398));
#3307=CARTESIAN_POINT('',(151.192899444467,-134.975757312707,0.160000005882634));
#3308=CARTESIAN_POINT('',(149.584591221535,-133.239076831245,0.160000008942724));
#3309=CARTESIAN_POINT('',(148.252815639483,-131.291057195031,0.160000012090376));
#3310=CARTESIAN_POINT('',(147.22286997769,-129.172507838626,0.16000001584532));
#3311=CARTESIAN_POINT('',(146.516226708836,-126.928985762358,0.160000020071578));
#3312=CARTESIAN_POINT('',(146.147476968753,-124.612689830217,0.160000024799764));
#3313=CARTESIAN_POINT('',(146.122711306905,-122.270064557649,0.160000030028308));
#3314=CARTESIAN_POINT('',(146.441151559965,-119.95619203299,0.160000035750121));
#3315=CARTESIAN_POINT('',(147.094396478251,-117.717864257412,0.160000041971315));
#3316=CARTESIAN_POINT('',(148.067515046046,-115.603466526409,0.160000048692628));
#3317=CARTESIAN_POINT('',(149.337048351293,-113.659870779388,0.160000055907922));
#3318=CARTESIAN_POINT('',(150.875487112707,-111.9264242624,0.160000063624221));
#3319=CARTESIAN_POINT('',(152.648013359757,-110.440772052826,0.160000071838466));
#3320=CARTESIAN_POINT('',(154.614482796526,-109.234281210994,0.160000080547217));
#3321=CARTESIAN_POINT('',(156.73269959245,-108.331111956867,0.160000089755502));
#3322=CARTESIAN_POINT('',(158.955565279118,-107.74992581426,0.16000009946031));
#3323=CARTESIAN_POINT('',(161.234951350788,-107.501707522426,0.160000109663259));
#3324=CARTESIAN_POINT('',(163.521721862669,-107.590559988164,0.160000120366253));
#3325=CARTESIAN_POINT('',(165.765407076077,-108.013084209593,0.160000131564584));
#3326=CARTESIAN_POINT('',(167.918373404275,-108.758652620692,0.160000143261056));
#3327=CARTESIAN_POINT('',(169.935131733954,-109.810500106027,0.160000155461027));
#3328=CARTESIAN_POINT('',(171.770026218244,-111.14277989281,0.160000168146643));
#3329=CARTESIAN_POINT('',(173.387439845355,-112.727712841682,0.160000181340129));
#3330=CARTESIAN_POINT('',(174.751610135246,-114.529008233749,0.160000195031064));
#3331=CARTESIAN_POINT('',(175.834184651578,-116.50658877547,0.160000209218705));
#3332=CARTESIAN_POINT('',(176.612914116066,-118.616379519424,0.160000223899272));
#3333=CARTESIAN_POINT('',(177.072779481963,-120.813305715657,0.160000239080449));
#3334=CARTESIAN_POINT('',(177.204874208051,-123.049403326582,0.160000254761624));
#3335=CARTESIAN_POINT('',(177.007929921357,-125.274806056211,0.160000270932895));
#3336=CARTESIAN_POINT('',(176.487494519341,-127.443465320174,0.160000287608995));
#3337=CARTESIAN_POINT('',(175.656168651329,-129.507755324912,0.160000304783049));
#3338=CARTESIAN_POINT('',(174.53333802813,-131.423420003283,0.160000322454519));
#3339=CARTESIAN_POINT('',(173.144987396479,-133.149435806472,0.160000340619052));
#3340=CARTESIAN_POINT('',(171.520671553097,-134.650679219956,0.160000359294773));
#3341=CARTESIAN_POINT('',(169.699575477548,-135.893169870291,0.160000378447694));
#3342=CARTESIAN_POINT('',(167.71899665818,-136.853647552158,0.160000398110742));
#3343=CARTESIAN_POINT('',(165.622859210925,-137.511578024446,0.160000418277703));
#3344=CARTESIAN_POINT('',(163.459314580148,-137.853727702742,0.160000438926891));
#3345=CARTESIAN_POINT('',(161.273290943127,-137.874901450217,0.160000460078175));
#3346=CARTESIAN_POINT('',(159.110618059884,-137.575076580747,0.160000481748473));
#3347=CARTESIAN_POINT('',(157.023489424735,-136.963579353075,0.160000503879358));
#3348=CARTESIAN_POINT('',(155.049929186497,-136.052993910361,0.160000526544123));
#3349=CARTESIAN_POINT('',(153.237602440352,-134.86653170111,0.16000054968023));
#3350=CARTESIAN_POINT('',(151.621301820895,-133.429051226082,0.160000573333212));
#3351=CARTESIAN_POINT('',(150.237783890657,-131.775053086039,0.160000597463171));
#3352=CARTESIAN_POINT('',(149.113649533131,-129.938871586778,0.160000622107286));
#3353=CARTESIAN_POINT('',(148.273408405977,-127.962570985729,0.160000647242086));
#3354=CARTESIAN_POINT('',(147.733477098047,-125.889077750987,0.160000672874315));
#3355=CARTESIAN_POINT('',(147.504194625274,-123.763123315217,0.160000699010233));
#3356=CARTESIAN_POINT('',(147.589296441328,-121.631448352422,0.160000725643486));
#3357=CARTESIAN_POINT('',(147.985242992552,-119.540650078859,0.160000752767122));
#3358=CARTESIAN_POINT('',(148.682522823343,-117.534291346366,0.160000780401061));
#3359=CARTESIAN_POINT('',(149.663906468082,-115.65736568414,0.160000808516593));
#3360=CARTESIAN_POINT('',(150.907682509418,-113.948089531254,0.160000837139813));
#3361=CARTESIAN_POINT('',(152.385074850061,-112.443699261656,0.160000866253279));
#3362=CARTESIAN_POINT('',(154.064562463563,-111.174470861668,0.160000895884995));
#3363=CARTESIAN_POINT('',(155.907465704577,-110.168369016475,0.160000926006311));
#3364=CARTESIAN_POINT('',(157.871278662007,-109.4457822481,0.160000956591472));
#3365=CARTESIAN_POINT('',(159.918542866036,-109.019539985353,0.160000987725936));
#3366=CARTESIAN_POINT('',(161.99854840454,-108.898962822784,0.160001019315662));
#3367=CARTESIAN_POINT('',(164.070388182335,-109.084456153315,0.160001051425425));
#3368=CARTESIAN_POINT('',(166.087808808465,-109.571066994363,0.160001084033279));
#3369=CARTESIAN_POINT('',(168.00678239555,-110.346261923035,0.160001117125992));
#3370=CARTESIAN_POINT('',(169.788200327651,-111.393017133991,0.160001150739497));
#3371=CARTESIAN_POINT('',(171.391818317442,-112.685926621113,0.160001184826758));
#3372=CARTESIAN_POINT('',(172.786135484854,-114.197926888315,0.160001219440651));
#3373=CARTESIAN_POINT('',(173.939378348561,-115.892334821474,0.160001254513383));
#3374=CARTESIAN_POINT('',(174.830121446527,-117.734415691909,0.160001290106858));
#3375=CARTESIAN_POINT('',(175.439380471504,-119.683313638481,0.160001326209522));
#3376=CARTESIAN_POINT('',(175.755047083255,-121.694033744902,0.160001362779311));
#3377=CARTESIAN_POINT('',(175.772291291393,-123.725542405083,0.160001399866049));
#3378=CARTESIAN_POINT('',(175.491792048209,-125.732494064636,0.160001437445684));
#3379=CARTESIAN_POINT('',(174.92141020946,-127.671660893751,0.160001475516543));
#3380=CARTESIAN_POINT('',(174.073445175767,-129.5035402953,0.160001514127393));
#3381=CARTESIAN_POINT('',(172.970553153803,-131.184112554238,0.160001553165235));
#3382=CARTESIAN_POINT('',(171.633610691529,-132.683851458437,0.160001592776849));
#3383=CARTESIAN_POINT('',(170.097640834325,-133.965542595343,0.1600016328099));
#3384=CARTESIAN_POINT('',(168.391885810875,-135.00712617662,0.160001673401031));
#3385=CARTESIAN_POINT('',(166.557464511197,-135.784410360137,0.160001714459614));
#3386=CARTESIAN_POINT('',(164.633321998578,-136.282998661098,0.160001756020902));
#3387=CARTESIAN_POINT('',(162.661325266698,-136.493285589606,0.160001798086658));
#3388=CARTESIAN_POINT('',(160.684463362016,-136.411919444899,0.160001840655459));
#3389=CARTESIAN_POINT('',(158.747133757265,-136.04266664652,0.160001883688897));
#3390=CARTESIAN_POINT('',(156.88718399087,-135.393726863877,0.160001927276944));
#3391=CARTESIAN_POINT('',(155.149536232309,-134.482471100148,0.160001971295762));
#3392=CARTESIAN_POINT('',(153.566339868193,-133.327515718496,0.160002015868301));
#3393=CARTESIAN_POINT('',(152.174475178497,-131.957239695072,0.160002060899663));
#3394=CARTESIAN_POINT('',(151.000423673687,-130.399502779515,0.160002106483032));
#3395=CARTESIAN_POINT('',(150.071610928884,-128.693390701403,0.160002152487954));
#3396=CARTESIAN_POINT('',(149.403951491369,-126.872254929965,0.16000219903667));
#3397=CARTESIAN_POINT('',(149.01195486367,-124.97680838505,0.160002246101578));
#3398=CARTESIAN_POINT('',(148.902724749935,-123.051464551099,0.160002293608397));
#3399=CARTESIAN_POINT('',(149.076860045609,-121.134047309493,0.160002341655155));
#3400=CARTESIAN_POINT('',(149.529505816094,-119.267986830102,0.160002390192998));
#3401=CARTESIAN_POINT('',(150.248938625018,-117.493625827353,0.160002439211364));
#3402=CARTESIAN_POINT('',(151.219266077144,-115.847176993296,0.160002488761246));
#3403=CARTESIAN_POINT('',(152.416804499557,-114.365782531773,0.160002538772607));
#3404=CARTESIAN_POINT('',(153.816570818339,-113.078385984344,0.160002589328043));
#3405=CARTESIAN_POINT('',(155.383907324376,-112.014604316977,0.160002640309008));
#3406=CARTESIAN_POINT('',(157.087889225569,-111.193378030272,0.160002691845708));
#3407=CARTESIAN_POINT('',(158.889419057288,-110.6328460095,0.160002743881244));
#3408=CARTESIAN_POINT('',(160.747449248387,-110.343667728327,0.160002796373571));
#3409=CARTESIAN_POINT('',(162.624053356893,-110.330283745183,0.160002849394294));
#3410=CARTESIAN_POINT('',(164.476726893157,-110.591733239874,0.160002902890698));
#3411=CARTESIAN_POINT('',(166.266899642908,-111.120892581716,0.16000295689989));
#3412=CARTESIAN_POINT('',(167.956802867635,-111.905958896692,0.160003011451085));
#3413=CARTESIAN_POINT('',(169.506528079171,-112.925998773838,0.160003066404273));
#3414=CARTESIAN_POINT('',(170.888739980658,-114.16159961128,0.160003121961565));
#3415=CARTESIAN_POINT('',(172.069227378914,-115.580229551643,0.160003177907594));
#3416=CARTESIAN_POINT('',(173.027867427623,-117.155151869627,0.160003234444669));
#3417=CARTESIAN_POINT('',(173.742038954282,-118.84705973409,0.160003291403546));
#3418=CARTESIAN_POINT('',(174.199440602942,-120.622200725261,0.160003348907743));
#3419=CARTESIAN_POINT('',(174.390761044762,-122.439927930514,0.160003406892666));
#3420=CARTESIAN_POINT('',(174.313170747688,-124.262608059952,0.160003465422186));
#3421=CARTESIAN_POINT('',(173.970498679039,-126.046587877149,0.160003524354735));
#3422=CARTESIAN_POINT('',(173.37013197675,-127.759686478325,0.160003583900388));
#3423=CARTESIAN_POINT('',(172.52836136188,-129.359001454378,0.160003643841441));
#3424=CARTESIAN_POINT('',(171.463394716978,-130.814635383311,0.16000370431787));
#3425=CARTESIAN_POINT('',(170.198955910696,-132.095193530517,0.160003765321193));
#3426=CARTESIAN_POINT('',(168.765309486899,-133.172532128833,0.160003826772888));
#3427=CARTESIAN_POINT('',(167.192404659805,-134.026070705307,0.160003888759866));
#3428=CARTESIAN_POINT('',(165.515940315419,-134.637647841233,0.16000395123836));
#3429=CARTESIAN_POINT('',(163.77337462532,-134.995507969924,0.160004014187562));
#3430=CARTESIAN_POINT('',(162.000939419639,-135.093516143868,0.160004077672018));
#3431=CARTESIAN_POINT('',(160.23859870135,-134.930696608052,0.160004141638125));
#3432=CARTESIAN_POINT('',(158.523781555035,-134.512070022902,0.16000420610881));
#3433=CARTESIAN_POINT('',(156.893827483165,-133.84822622358,0.160004271063607));
#3434=CARTESIAN_POINT('',(155.383266117251,-132.954967822687,0.160004336508589));
#3435=CARTESIAN_POINT('',(154.023577476033,-131.852479767366,0.160004402467121));
#3436=CARTESIAN_POINT('',(152.84364735527,-130.565771868867,0.160004468929652));
#3437=CARTESIAN_POINT('',(151.868193284784,-129.124009138333,0.160004535881198));
#3438=CARTESIAN_POINT('',(151.116865809482,-127.558448083847,0.160004603355144));
#3439=CARTESIAN_POINT('',(150.605319531828,-125.905661881809,0.160004671267085));
#3440=CARTESIAN_POINT('',(150.342318671634,-124.199350981106,0.160004739722389));
#3441=CARTESIAN_POINT('',(150.332825206471,-122.47743707009,0.16000480868904));
#3442=CARTESIAN_POINT('',(150.575244271614,-120.77879479136,0.160004878102937));
#3443=CARTESIAN_POINT('',(151.063334450642,-119.137622237418,0.160004948063953));
#3444=CARTESIAN_POINT('',(151.78461052278,-117.591149029225,0.160005018482711));
#3445=CARTESIAN_POINT('',(152.722958875726,-116.170502555755,0.160005089441795));
#3446=CARTESIAN_POINT('',(153.855730878312,-114.907422363225,0.160005160852681));
#3447=CARTESIAN_POINT('',(155.158168039084,-113.827016528805,0.160005232779856));
#3448=CARTESIAN_POINT('',(156.601044257915,-112.95197113816,0.160005305209079));
#3449=CARTESIAN_POINT('',(158.152309878665,-112.300025687164,0.16000537813801));
#3450=CARTESIAN_POINT('',(159.778042060669,-111.88411230054,0.16000545157637));
#3451=CARTESIAN_POINT('',(161.441335900432,-111.711787202139,0.160005525464952));
#3452=CARTESIAN_POINT('',(163.109516856509,-111.785572000486,0.160005599962855));
#3453=CARTESIAN_POINT('',(164.740712688815,-112.101789793837,0.160005674804393));
#3454=CARTESIAN_POINT('',(166.306479858766,-112.653495181804,0.160005750299043));
#3455=CARTESIAN_POINT('',(167.767390685687,-113.425617000967,0.160005826159527));
#3456=CARTESIAN_POINT('',(169.096244490206,-114.401331376609,0.160005902565281));
#3457=CARTESIAN_POINT('',(170.264494321068,-115.558873978544,0.160005979508742));
#3458=CARTESIAN_POINT('',(171.246322095606,-116.870187932991,0.160006056874972));
#3459=CARTESIAN_POINT('',(172.023313187148,-118.307804697302,0.160006134778246));
#3460=CARTESIAN_POINT('',(172.579331515081,-119.84032683942,0.160006213226718));
#3461=CARTESIAN_POINT('',(172.903103823481,-121.43107569957,0.160006292072017));
#3462=CARTESIAN_POINT('',(172.989695978605,-123.04951488014,0.160006371525263));
#3463=CARTESIAN_POINT('',(172.838408021161,-124.656136758362,0.160006451367792));
#3464=CARTESIAN_POINT('',(172.453589053868,-126.220650483492,0.160006531821546));
#3465=CARTESIAN_POINT('',(171.845508109442,-127.705757796352,0.160006612697106));
#3466=CARTESIAN_POINT('',(171.028831586899,-129.08123383971,0.160006694055807));
#3467=CARTESIAN_POINT('',(170.021373428038,-130.319016339905,0.160006775971264));
#3468=CARTESIAN_POINT('',(168.847639915945,-131.391472212955,0.160006858321299));
#3469=CARTESIAN_POINT('',(167.531718708637,-132.278219901158,0.160006941261132));
#3470=CARTESIAN_POINT('',(166.106087271977,-132.959162060556,0.160007024590426));
#3471=CARTESIAN_POINT('',(164.599492229905,-133.422567408424,0.160007108480407));
#3472=CARTESIAN_POINT('',(163.045616290769,-133.658938406061,0.160007192887139));
#3473=CARTESIAN_POINT('',(161.479988238949,-133.664704868538,0.160007277723104));
#3474=CARTESIAN_POINT('',(159.933959155324,-133.441165472691,0.160007363127641));
#3475=CARTESIAN_POINT('',(158.442432476297,-132.994343671437,0.160007449017762));
#3476=CARTESIAN_POINT('',(157.038205998506,-132.336213954455,0.160007535328488));
#3477=CARTESIAN_POINT('',(155.747949914851,-131.480407660588,0.160007622268249));
#3478=CARTESIAN_POINT('',(154.602679585071,-130.4492428718,0.160007709572804));
#3479=CARTESIAN_POINT('',(153.623239994086,-129.263862066781,0.160007797456873));
#3480=CARTESIAN_POINT('',(152.831250919911,-127.952055675264,0.160007885810578));
#3481=CARTESIAN_POINT('',(152.242147898052,-126.542468133614,0.160007974675935));
#3482=CARTESIAN_POINT('',(151.867600306346,-125.066325974915,0.160008064040616));
#3483=CARTESIAN_POINT('',(151.714346116263,-123.556341437564,0.160008153884245));
#3484=CARTESIAN_POINT('',(151.784083806945,-122.045166003498,0.160008244218265));
#3485=CARTESIAN_POINT('',(152.074220718883,-120.564440867796,0.160008335107461));
#3486=CARTESIAN_POINT('',(152.576585028072,-119.148021906015,0.160008426423318));
#3487=CARTESIAN_POINT('',(153.279374535702,-117.824394135282,0.160008518274212));
#3488=CARTESIAN_POINT('',(154.166082381299,-116.622102044016,0.160008610629343));
#3489=CARTESIAN_POINT('',(155.216641024337,-115.566256538326,0.160008703508508));
#3490=CARTESIAN_POINT('',(156.405737708414,-114.679787803461,0.160008796794221));
#3491=CARTESIAN_POINT('',(157.708785465896,-113.979173491291,0.160008890650068));
#3492=CARTESIAN_POINT('',(159.095409164072,-113.47930587561,0.160008984961997));
#3493=CARTESIAN_POINT('',(160.536386816688,-113.189210388297,0.160009079821139));
#3494=CARTESIAN_POINT('',(161.998674370943,-113.114123197845,0.160009175123927));
#3495=CARTESIAN_POINT('',(163.451831112441,-113.254005518903,0.160009270957114));
#3496=CARTESIAN_POINT('',(164.8648265398,-113.604892999124,0.160009367347177));
#3497=CARTESIAN_POINT('',(166.205341369662,-114.15718587739,0.160009464154043));
#3498=CARTESIAN_POINT('',(167.445944451876,-114.897501604245,0.160009561438586));
#3499=CARTESIAN_POINT('',(168.561446287043,-115.809561230703,0.160009659292233));
#3500=CARTESIAN_POINT('',(169.527015472621,-116.871069953499,0.16000975756763));
#3501=CARTESIAN_POINT('',(170.324409539011,-118.060175600345,0.16000985645221));
#3502=CARTESIAN_POINT('',(170.935664745766,-119.347347048175,0.16000995569953));
#3503=CARTESIAN_POINT('',(171.350412299046,-120.706960962122,0.160010055541829));
#3504=CARTESIAN_POINT('',(171.560179127162,-122.107114667471,0.160010155821757));
#3505=CARTESIAN_POINT('',(171.562182845193,-123.518727815618,0.160010256648328));
#3506=CARTESIAN_POINT('',(171.357574632823,-124.910573286646,0.160010357974317));
#3507=CARTESIAN_POINT('',(170.952107481572,-126.252698717981,0.160010459805351));
#3508=CARTESIAN_POINT('',(170.356726458471,-127.515251497483,0.160010562037925));
#3509=CARTESIAN_POINT('',(169.583948718715,-128.674378127627,0.160010664921522));
#3510=CARTESIAN_POINT('',(168.653849968792,-129.702395655458,0.160010768159063));
#3511=CARTESIAN_POINT('',(167.586318474477,-130.580209478926,0.16001087193942));
#3512=CARTESIAN_POINT('',(166.404942925527,-131.289573986942,0.160010976273199));
#3513=CARTESIAN_POINT('',(165.137659031286,-131.815550214908,0.160011081025645));
#3514=CARTESIAN_POINT('',(163.811078846443,-132.148817099082,0.160011186317045));
#3515=CARTESIAN_POINT('',(162.454306326392,-132.283152543898,0.160011292142194));
#3516=CARTESIAN_POINT('',(161.098261798655,-132.21716134844,0.160011398393665));
#3517=CARTESIAN_POINT('',(159.770347438779,-131.953533478298,0.160011505224397));
#3518=CARTESIAN_POINT('',(158.501011734286,-131.499718396146,0.16001161247608));
#3519=CARTESIAN_POINT('',(157.315944815901,-130.866626018501,0.160011720257323));
#3520=CARTESIAN_POINT('',(156.240477699547,-130.069194907852,0.16001182854561));
#3521=CARTESIAN_POINT('',(155.296992652729,-129.125623504341,0.160011937360845));
#3522=CARTESIAN_POINT('',(154.505782666524,-128.058470016548,0.160012046589445));
#3523=CARTESIAN_POINT('',(153.881977752966,-126.891092496587,0.160012156312776));
#3524=CARTESIAN_POINT('',(153.437622280349,-125.648508742863,0.160012266607592));
#3525=CARTESIAN_POINT('',(153.181569016168,-124.358744491796,0.160012377412484));
#3526=CARTESIAN_POINT('',(153.117899157185,-123.051309464924,0.160012488621121));
#3527=CARTESIAN_POINT('',(153.246418707719,-121.75252948478,0.160012600410914));
#3528=CARTESIAN_POINT('',(153.563343512828,-120.490974992014,0.160012712740764));
#3529=CARTESIAN_POINT('',(154.059821835912,-119.295113419636,0.160012825475359));
#3530=CARTESIAN_POINT('',(154.723916723736,-118.189232142002,0.160012938705615));
#3531=CARTESIAN_POINT('',(155.540050704318,-117.196567639804,0.160013052430769));
#3532=CARTESIAN_POINT('',(156.489868148971,-116.337334470397,0.16001316670136));
#3533=CARTESIAN_POINT('',(157.551997864655,-115.629443964863,0.16001328151283));
#3534=CARTESIAN_POINT('',(158.700832453559,-115.087833170097,0.16001339668953));
#3535=CARTESIAN_POINT('',(159.913145566436,-114.721772458479,0.160013512465874));
#3536=CARTESIAN_POINT('',(161.160744353216,-114.538542946737,0.160013628689971));
#3537=CARTESIAN_POINT('',(162.416769978546,-114.540331169176,0.16001374540083));
#3538=CARTESIAN_POINT('',(163.655496646853,-114.726076001881,0.160013862739033));
#3539=CARTESIAN_POINT('',(164.847849373866,-115.090211608197,0.160013980482417));
#3540=CARTESIAN_POINT('',(165.968177695324,-115.622459237335,0.160014098574442));
#3541=CARTESIAN_POINT('',(166.996860310969,-116.312638365209,0.160014217479682));
#3542=CARTESIAN_POINT('',(167.907348600019,-117.141411920868,0.160014336620603));
#3543=CARTESIAN_POINT('',(168.683970207078,-118.091693456874,0.160014456347584));
#3544=CARTESIAN_POINT('',(169.310150518336,-119.141742016092,0.160014576587651));
#3545=CARTESIAN_POINT('',(169.773363404053,-120.267318478236,0.160014697268545));
#3546=CARTESIAN_POINT('',(170.065322461452,-121.444824624203,0.160014818531033));
#3547=CARTESIAN_POINT('',(170.180644493341,-122.647502277155,0.160014940279637));
#3548=CARTESIAN_POINT('',(170.118361425379,-123.848909544834,0.160015062494088));
#3549=CARTESIAN_POINT('',(169.881492058874,-125.022908657545,0.160015185152345));
#3550=CARTESIAN_POINT('',(169.476245441775,-126.145572280565,0.160015308385624));
#3551=CARTESIAN_POINT('',(168.912666790588,-127.19250117376,0.160015432142839));
#3552=CARTESIAN_POINT('',(168.204230810039,-128.141340125451,0.160015556400561));
#3553=CARTESIAN_POINT('',(167.368816266077,-128.971453758802,0.160015680986834));
#3554=CARTESIAN_POINT('',(166.422571512261,-129.668352043779,0.160015806319495));
#3555=CARTESIAN_POINT('',(165.390456828708,-130.21544557897,0.16001593191306));
#3556=CARTESIAN_POINT('',(164.292043610086,-130.604068219231,0.160016058205385));
#3557=CARTESIAN_POINT('',(163.155168363934,-130.825932260227,0.160016184776824));
#3558=CARTESIAN_POINT('',(162.383275345144,-130.860980352237,0.16001626989908));
#3559=CARTESIAN_POINT('',(162.,-130.85,0.160016312426602));
#3560=CARTESIAN_POINT('',(161.021593720181,-139.206700805769,0.));
#3561=CARTESIAN_POINT('',(160.555396334987,-139.171934706295,0.));
#3562=CARTESIAN_POINT('',(159.695774486404,-139.070379518916,0.));
#3563=CARTESIAN_POINT('',(158.458674979471,-138.82301184083,0.));
#3564=CARTESIAN_POINT('',(156.930969031675,-138.397599241146,0.));
#3565=CARTESIAN_POINT('',(155.091636869036,-137.658492417043,0.));
#3566=CARTESIAN_POINT('',(153.041136435955,-136.459689922951,0.));
#3567=CARTESIAN_POINT('',(151.192899444476,-134.975757312708,0.));
#3568=CARTESIAN_POINT('',(149.584591221542,-133.239076831246,0.));
#3569=CARTESIAN_POINT('',(148.252815639487,-131.291057195031,0.));
#3570=CARTESIAN_POINT('',(147.22286997769,-129.172507838626,0.));
#3571=CARTESIAN_POINT('',(146.516226708832,-126.928985762358,0.));
#3572=CARTESIAN_POINT('',(146.147476968745,-124.612689830217,0.));
#3573=CARTESIAN_POINT('',(146.122711306893,-122.270064557648,0.));
#3574=CARTESIAN_POINT('',(146.441151559949,-119.956192032989,0.));
#3575=CARTESIAN_POINT('',(147.094396478232,-117.717864257411,0.));
#3576=CARTESIAN_POINT('',(148.067515046022,-115.603466526408,0.));
#3577=CARTESIAN_POINT('',(149.337048351266,-113.659870779386,0.));
#3578=CARTESIAN_POINT('',(150.875487112676,-111.926424262398,0.));
#3579=CARTESIAN_POINT('',(152.648013359724,-110.440772052823,0.));
#3580=CARTESIAN_POINT('',(154.614482796489,-109.234281210991,0.));
#3581=CARTESIAN_POINT('',(156.732699592412,-108.331111956864,0.));
#3582=CARTESIAN_POINT('',(158.955565279078,-107.749925814257,0.));
#3583=CARTESIAN_POINT('',(161.234951350748,-107.501707522423,0.));
#3584=CARTESIAN_POINT('',(163.521721862629,-107.590559988161,0.));
#3585=CARTESIAN_POINT('',(165.765407076036,-108.01308420959,0.));
#3586=CARTESIAN_POINT('',(167.918373404235,-108.758652620689,0.));
#3587=CARTESIAN_POINT('',(169.935131733916,-109.810500106025,0.));
#3588=CARTESIAN_POINT('',(171.770026218208,-111.142779892807,0.));
#3589=CARTESIAN_POINT('',(173.387439845321,-112.72771284168,0.));
#3590=CARTESIAN_POINT('',(174.751610135215,-114.529008233747,0.));
#3591=CARTESIAN_POINT('',(175.83418465155,-116.506588775468,0.));
#3592=CARTESIAN_POINT('',(176.612914116042,-118.616379519423,0.));
#3593=CARTESIAN_POINT('',(177.072779481942,-120.813305715655,0.));
#3594=CARTESIAN_POINT('',(177.204874208034,-123.04940332658,0.));
#3595=CARTESIAN_POINT('',(177.007929921344,-125.27480605621,0.));
#3596=CARTESIAN_POINT('',(176.487494519333,-127.443465320173,0.));
#3597=CARTESIAN_POINT('',(175.656168651324,-129.507755324911,0.));
#3598=CARTESIAN_POINT('',(174.533338028129,-131.423420003283,0.));
#3599=CARTESIAN_POINT('',(173.144987396481,-133.149435806472,0.));
#3600=CARTESIAN_POINT('',(171.520671553101,-134.650679219957,0.));
#3601=CARTESIAN_POINT('',(169.699575477555,-135.893169870292,0.));
#3602=CARTESIAN_POINT('',(167.718996658189,-136.853647552159,0.));
#3603=CARTESIAN_POINT('',(165.622859210936,-137.511578024446,0.));
#3604=CARTESIAN_POINT('',(163.45931458016,-137.853727702743,0.));
#3605=CARTESIAN_POINT('',(161.27329094314,-137.874901450218,0.));
#3606=CARTESIAN_POINT('',(159.110618059896,-137.575076580748,0.));
#3607=CARTESIAN_POINT('',(157.023489424746,-136.963579353076,0.));
#3608=CARTESIAN_POINT('',(155.049929186507,-136.052993910362,0.));
#3609=CARTESIAN_POINT('',(153.237602440361,-134.866531701111,0.));
#3610=CARTESIAN_POINT('',(151.621301820902,-133.429051226083,0.));
#3611=CARTESIAN_POINT('',(150.237783890661,-131.775053086039,0.));
#3612=CARTESIAN_POINT('',(149.113649533132,-129.938871586778,0.));
#3613=CARTESIAN_POINT('',(148.273408405975,-127.962570985729,0.));
#3614=CARTESIAN_POINT('',(147.733477098041,-125.889077750987,0.));
#3615=CARTESIAN_POINT('',(147.504194625265,-123.763123315216,0.));
#3616=CARTESIAN_POINT('',(147.589296441315,-121.631448352421,0.));
#3617=CARTESIAN_POINT('',(147.985242992535,-119.540650078858,0.));
#3618=CARTESIAN_POINT('',(148.682522823322,-117.534291346364,0.));
#3619=CARTESIAN_POINT('',(149.663906468058,-115.657365684139,0.));
#3620=CARTESIAN_POINT('',(150.907682509391,-113.948089531252,0.));
#3621=CARTESIAN_POINT('',(152.385074850031,-112.443699261653,0.));
#3622=CARTESIAN_POINT('',(154.06456246353,-111.174470861665,0.));
#3623=CARTESIAN_POINT('',(155.907465704542,-110.168369016472,0.));
#3624=CARTESIAN_POINT('',(157.871278661971,-109.445782248097,0.));
#3625=CARTESIAN_POINT('',(159.918542865999,-109.01953998535,0.));
#3626=CARTESIAN_POINT('',(161.998548404502,-108.898962822781,0.));
#3627=CARTESIAN_POINT('',(164.070388182297,-109.084456153312,0.));
#3628=CARTESIAN_POINT('',(166.087808808427,-109.57106699436,0.));
#3629=CARTESIAN_POINT('',(168.006782395513,-110.346261923032,0.));
#3630=CARTESIAN_POINT('',(169.788200327616,-111.393017133988,0.));
#3631=CARTESIAN_POINT('',(171.391818317409,-112.68592662111,0.));
#3632=CARTESIAN_POINT('',(172.786135484823,-114.197926888313,0.));
#3633=CARTESIAN_POINT('',(173.939378348533,-115.892334821472,0.));
#3634=CARTESIAN_POINT('',(174.830121446502,-117.734415691907,0.));
#3635=CARTESIAN_POINT('',(175.439380471481,-119.683313638479,0.));
#3636=CARTESIAN_POINT('',(175.755047083236,-121.694033744901,0.));
#3637=CARTESIAN_POINT('',(175.772291291377,-123.725542405081,0.));
#3638=CARTESIAN_POINT('',(175.491792048197,-125.732494064635,0.));
#3639=CARTESIAN_POINT('',(174.921410209452,-127.671660893751,0.));
#3640=CARTESIAN_POINT('',(174.073445175762,-129.5035402953,0.));
#3641=CARTESIAN_POINT('',(172.970553153802,-131.184112554238,0.));
#3642=CARTESIAN_POINT('',(171.63361069153,-132.683851458438,0.));
#3643=CARTESIAN_POINT('',(170.097640834329,-133.965542595344,0.));
#3644=CARTESIAN_POINT('',(168.391885810881,-135.00712617662,0.));
#3645=CARTESIAN_POINT('',(166.557464511204,-135.784410360138,0.));
#3646=CARTESIAN_POINT('',(164.633321998587,-136.282998661099,0.));
#3647=CARTESIAN_POINT('',(162.661325266708,-136.493285589607,0.));
#3648=CARTESIAN_POINT('',(160.684463362026,-136.411919444899,0.));
#3649=CARTESIAN_POINT('',(158.747133757275,-136.04266664652,0.));
#3650=CARTESIAN_POINT('',(156.887183990879,-135.393726863878,0.));
#3651=CARTESIAN_POINT('',(155.149536232317,-134.482471100149,0.));
#3652=CARTESIAN_POINT('',(153.566339868199,-133.327515718497,0.));
#3653=CARTESIAN_POINT('',(152.174475178501,-131.957239695072,0.));
#3654=CARTESIAN_POINT('',(151.000423673689,-130.399502779515,0.));
#3655=CARTESIAN_POINT('',(150.071610928883,-128.693390701403,0.));
#3656=CARTESIAN_POINT('',(149.403951491364,-126.872254929965,0.));
#3657=CARTESIAN_POINT('',(149.011954863663,-124.976808385049,0.));
#3658=CARTESIAN_POINT('',(148.902724749924,-123.051464551098,0.));
#3659=CARTESIAN_POINT('',(149.076860045595,-121.134047309492,0.));
#3660=CARTESIAN_POINT('',(149.529505816076,-119.267986830101,0.));
#3661=CARTESIAN_POINT('',(150.248938624997,-117.493625827352,0.));
#3662=CARTESIAN_POINT('',(151.21926607712,-115.847176993294,0.));
#3663=CARTESIAN_POINT('',(152.41680449953,-114.365782531771,0.));
#3664=CARTESIAN_POINT('',(153.81657081831,-113.078385984341,0.));
#3665=CARTESIAN_POINT('',(155.383907324344,-112.014604316974,0.));
#3666=CARTESIAN_POINT('',(157.087889225536,-111.19337803027,0.));
#3667=CARTESIAN_POINT('',(158.889419057253,-110.632846009498,0.));
#3668=CARTESIAN_POINT('',(160.747449248352,-110.343667728324,0.));
#3669=CARTESIAN_POINT('',(162.624053356857,-110.33028374518,0.));
#3670=CARTESIAN_POINT('',(164.476726893121,-110.591733239871,0.));
#3671=CARTESIAN_POINT('',(166.266899642872,-111.120892581714,0.));
#3672=CARTESIAN_POINT('',(167.9568028676,-111.90595889669,0.));
#3673=CARTESIAN_POINT('',(169.506528079138,-112.925998773836,0.));
#3674=CARTESIAN_POINT('',(170.888739980627,-114.161599611278,0.));
#3675=CARTESIAN_POINT('',(172.069227378886,-115.580229551641,0.));
#3676=CARTESIAN_POINT('',(173.027867427597,-117.155151869625,0.));
#3677=CARTESIAN_POINT('',(173.742038954259,-118.847059734088,0.));
#3678=CARTESIAN_POINT('',(174.199440602922,-120.622200725259,0.));
#3679=CARTESIAN_POINT('',(174.390761044745,-122.439927930512,0.));
#3680=CARTESIAN_POINT('',(174.313170747674,-124.262608059951,0.));
#3681=CARTESIAN_POINT('',(173.970498679029,-126.046587877148,0.));
#3682=CARTESIAN_POINT('',(173.370131976742,-127.759686478324,0.));
#3683=CARTESIAN_POINT('',(172.528361361875,-129.359001454378,0.));
#3684=CARTESIAN_POINT('',(171.463394716976,-130.814635383311,0.));
#3685=CARTESIAN_POINT('',(170.198955910696,-132.095193530517,0.));
#3686=CARTESIAN_POINT('',(168.765309486902,-133.172532128833,0.));
#3687=CARTESIAN_POINT('',(167.192404659809,-134.026070705307,0.));
#3688=CARTESIAN_POINT('',(165.515940315425,-134.637647841233,0.));
#3689=CARTESIAN_POINT('',(163.773374625326,-134.995507969925,0.));
#3690=CARTESIAN_POINT('',(162.000939419646,-135.093516143868,0.));
#3691=CARTESIAN_POINT('',(160.238598701358,-134.930696608053,0.));
#3692=CARTESIAN_POINT('',(158.523781555042,-134.512070022903,0.));
#3693=CARTESIAN_POINT('',(156.893827483172,-133.84822622358,0.));
#3694=CARTESIAN_POINT('',(155.383266117256,-132.954967822688,0.));
#3695=CARTESIAN_POINT('',(154.023577476036,-131.852479767366,0.));
#3696=CARTESIAN_POINT('',(152.843647355271,-130.565771868867,0.));
#3697=CARTESIAN_POINT('',(151.868193284783,-129.124009138333,0.));
#3698=CARTESIAN_POINT('',(151.116865809478,-127.558448083846,0.));
#3699=CARTESIAN_POINT('',(150.605319531822,-125.905661881809,0.));
#3700=CARTESIAN_POINT('',(150.342318671625,-124.199350981106,0.));
#3701=CARTESIAN_POINT('',(150.332825206459,-122.47743707009,0.));
#3702=CARTESIAN_POINT('',(150.575244271599,-120.778794791359,0.));
#3703=CARTESIAN_POINT('',(151.063334450624,-119.137622237416,0.));
#3704=CARTESIAN_POINT('',(151.784610522759,-117.591149029223,0.));
#3705=CARTESIAN_POINT('',(152.722958875702,-116.170502555753,0.));
#3706=CARTESIAN_POINT('',(153.855730878286,-114.907422363223,0.));
#3707=CARTESIAN_POINT('',(155.158168039055,-113.827016528803,0.));
#3708=CARTESIAN_POINT('',(156.601044257885,-112.951971138158,0.));
#3709=CARTESIAN_POINT('',(158.152309878633,-112.300025687162,0.));
#3710=CARTESIAN_POINT('',(159.778042060636,-111.884112300537,0.));
#3711=CARTESIAN_POINT('',(161.441335900398,-111.711787202136,0.));
#3712=CARTESIAN_POINT('',(163.109516856475,-111.785572000484,0.));
#3713=CARTESIAN_POINT('',(164.740712688782,-112.101789793835,0.));
#3714=CARTESIAN_POINT('',(166.306479858734,-112.653495181801,0.));
#3715=CARTESIAN_POINT('',(167.767390685655,-113.425617000965,0.));
#3716=CARTESIAN_POINT('',(169.096244490176,-114.401331376607,0.));
#3717=CARTESIAN_POINT('',(170.264494321039,-115.558873978542,0.));
#3718=CARTESIAN_POINT('',(171.24632209558,-116.870187932989,0.));
#3719=CARTESIAN_POINT('',(172.023313187125,-118.3078046973,0.));
#3720=CARTESIAN_POINT('',(172.57933151506,-119.840326839418,0.));
#3721=CARTESIAN_POINT('',(172.903103823462,-121.431075699569,0.));
#3722=CARTESIAN_POINT('',(172.989695978589,-123.049514880138,0.));
#3723=CARTESIAN_POINT('',(172.838408021148,-124.656136758361,0.));
#3724=CARTESIAN_POINT('',(172.453589053858,-126.220650483491,0.));
#3725=CARTESIAN_POINT('',(171.845508109434,-127.705757796351,0.));
#3726=CARTESIAN_POINT('',(171.028831586894,-129.08123383971,0.));
#3727=CARTESIAN_POINT('',(170.021373428035,-130.319016339905,0.));
#3728=CARTESIAN_POINT('',(168.847639915945,-131.391472212955,0.));
#3729=CARTESIAN_POINT('',(167.531718708638,-132.278219901159,0.));
#3730=CARTESIAN_POINT('',(166.10608727198,-132.959162060556,0.));
#3731=CARTESIAN_POINT('',(164.599492229909,-133.422567408425,0.));
#3732=CARTESIAN_POINT('',(163.045616290774,-133.658938406061,0.));
#3733=CARTESIAN_POINT('',(161.479988238954,-133.664704868538,0.));
#3734=CARTESIAN_POINT('',(159.933959155329,-133.441165472692,0.));
#3735=CARTESIAN_POINT('',(158.442432476302,-132.994343671437,0.));
#3736=CARTESIAN_POINT('',(157.038205998509,-132.336213954455,0.));
#3737=CARTESIAN_POINT('',(155.747949914854,-131.480407660588,0.));
#3738=CARTESIAN_POINT('',(154.602679585072,-130.4492428718,0.));
#3739=CARTESIAN_POINT('',(153.623239994085,-129.263862066781,0.));
#3740=CARTESIAN_POINT('',(152.831250919908,-127.952055675264,0.));
#3741=CARTESIAN_POINT('',(152.242147898046,-126.542468133614,0.));
#3742=CARTESIAN_POINT('',(151.867600306338,-125.066325974915,0.));
#3743=CARTESIAN_POINT('',(151.714346116252,-123.556341437563,0.));
#3744=CARTESIAN_POINT('',(151.784083806932,-122.045166003497,0.));
#3745=CARTESIAN_POINT('',(152.074220718867,-120.564440867795,0.));
#3746=CARTESIAN_POINT('',(152.576585028053,-119.148021906014,0.));
#3747=CARTESIAN_POINT('',(153.279374535681,-117.82439413528,0.));
#3748=CARTESIAN_POINT('',(154.166082381276,-116.622102044014,0.));
#3749=CARTESIAN_POINT('',(155.216641024312,-115.566256538324,0.));
#3750=CARTESIAN_POINT('',(156.405737708387,-114.679787803459,0.));
#3751=CARTESIAN_POINT('',(157.708785465868,-113.979173491289,0.));
#3752=CARTESIAN_POINT('',(159.095409164042,-113.479305875608,0.));
#3753=CARTESIAN_POINT('',(160.536386816658,-113.189210388295,0.));
#3754=CARTESIAN_POINT('',(161.998674370912,-113.114123197842,0.));
#3755=CARTESIAN_POINT('',(163.45183111241,-113.254005518901,0.));
#3756=CARTESIAN_POINT('',(164.864826539769,-113.604892999122,0.));
#3757=CARTESIAN_POINT('',(166.205341369632,-114.157185877388,0.));
#3758=CARTESIAN_POINT('',(167.445944451847,-114.897501604243,0.));
#3759=CARTESIAN_POINT('',(168.561446287015,-115.809561230701,0.));
#3760=CARTESIAN_POINT('',(169.527015472595,-116.871069953497,0.));
#3761=CARTESIAN_POINT('',(170.324409538987,-118.060175600344,0.));
#3762=CARTESIAN_POINT('',(170.935664745744,-119.347347048173,0.));
#3763=CARTESIAN_POINT('',(171.350412299026,-120.70696096212,0.));
#3764=CARTESIAN_POINT('',(171.560179127144,-122.10711466747,0.));
#3765=CARTESIAN_POINT('',(171.562182845179,-123.518727815617,0.));
#3766=CARTESIAN_POINT('',(171.357574632811,-124.910573286645,0.));
#3767=CARTESIAN_POINT('',(170.952107481562,-126.25269871798,0.));
#3768=CARTESIAN_POINT('',(170.356726458463,-127.515251497483,0.));
#3769=CARTESIAN_POINT('',(169.58394871871,-128.674378127626,0.));
#3770=CARTESIAN_POINT('',(168.653849968789,-129.702395655457,0.));
#3771=CARTESIAN_POINT('',(167.586318474475,-130.580209478926,0.));
#3772=CARTESIAN_POINT('',(166.404942925527,-131.289573986942,0.));
#3773=CARTESIAN_POINT('',(165.137659031287,-131.815550214908,0.));
#3774=CARTESIAN_POINT('',(163.811078846445,-132.148817099082,0.));
#3775=CARTESIAN_POINT('',(162.454306326394,-132.283152543898,0.));
#3776=CARTESIAN_POINT('',(161.098261798658,-132.21716134844,0.));
#3777=CARTESIAN_POINT('',(159.770347438782,-131.953533478298,0.));
#3778=CARTESIAN_POINT('',(158.501011734288,-131.499718396146,0.));
#3779=CARTESIAN_POINT('',(157.315944815902,-130.866626018501,0.));
#3780=CARTESIAN_POINT('',(156.240477699547,-130.069194907852,0.));
#3781=CARTESIAN_POINT('',(155.296992652728,-129.125623504341,0.));
#3782=CARTESIAN_POINT('',(154.505782666521,-128.058470016548,0.));
#3783=CARTESIAN_POINT('',(153.881977752961,-126.891092496586,0.));
#3784=CARTESIAN_POINT('',(153.437622280341,-125.648508742862,0.));
#3785=CARTESIAN_POINT('',(153.181569016159,-124.358744491795,0.));
#3786=CARTESIAN_POINT('',(153.117899157173,-123.051309464924,0.));
#3787=CARTESIAN_POINT('',(153.246418707705,-121.752529484779,0.));
#3788=CARTESIAN_POINT('',(153.563343512812,-120.490974992013,0.));
#3789=CARTESIAN_POINT('',(154.059821835894,-119.295113419635,0.));
#3790=CARTESIAN_POINT('',(154.723916723716,-118.189232142001,0.));
#3791=CARTESIAN_POINT('',(155.540050704295,-117.196567639803,0.));
#3792=CARTESIAN_POINT('',(156.489868148947,-116.337334470395,0.));
#3793=CARTESIAN_POINT('',(157.551997864629,-115.629443964861,0.));
#3794=CARTESIAN_POINT('',(158.700832453533,-115.087833170095,0.));
#3795=CARTESIAN_POINT('',(159.913145566409,-114.721772458477,0.));
#3796=CARTESIAN_POINT('',(161.160744353187,-114.538542946735,0.));
#3797=CARTESIAN_POINT('',(162.416769978517,-114.540331169174,0.));
#3798=CARTESIAN_POINT('',(163.655496646825,-114.726076001879,0.));
#3799=CARTESIAN_POINT('',(164.847849373838,-115.090211608195,0.));
#3800=CARTESIAN_POINT('',(165.968177695297,-115.622459237332,0.));
#3801=CARTESIAN_POINT('',(166.996860310943,-116.312638365207,0.));
#3802=CARTESIAN_POINT('',(167.907348599993,-117.141411920866,0.));
#3803=CARTESIAN_POINT('',(168.683970207054,-118.091693456872,0.));
#3804=CARTESIAN_POINT('',(169.310150518314,-119.141742016091,0.));
#3805=CARTESIAN_POINT('',(169.773363404033,-120.267318478234,0.));
#3806=CARTESIAN_POINT('',(170.065322461434,-121.444824624202,0.));
#3807=CARTESIAN_POINT('',(170.180644493325,-122.647502277154,0.));
#3808=CARTESIAN_POINT('',(170.118361425365,-123.848909544833,0.));
#3809=CARTESIAN_POINT('',(169.881492058862,-125.022908657544,0.));
#3810=CARTESIAN_POINT('',(169.476245441765,-126.145572280564,0.));
#3811=CARTESIAN_POINT('',(168.91266679058,-127.192501173759,0.));
#3812=CARTESIAN_POINT('',(168.204230810033,-128.14134012545,0.));
#3813=CARTESIAN_POINT('',(167.368816266073,-128.971453758802,0.));
#3814=CARTESIAN_POINT('',(166.422571512258,-129.668352043779,0.));
#3815=CARTESIAN_POINT('',(165.390456828706,-130.21544557897,0.));
#3816=CARTESIAN_POINT('',(164.292043610085,-130.604068219231,0.));
#3817=CARTESIAN_POINT('',(163.155168363933,-130.825932260227,0.));
#3818=CARTESIAN_POINT('',(162.383275345144,-130.860980352237,0.));
#3819=CARTESIAN_POINT('',(162.,-130.85,0.));
#3820=CARTESIAN_POINT('',(168.,-139.,0.));
#3821=CARTESIAN_POINT('',(168.,-139.,0.175));
#3822=CARTESIAN_POINT('',(168.,-138.25,0.));
#3823=CARTESIAN_POINT('',(168.,-139.,0.));
#3824=CARTESIAN_POINT('',(168.,-138.25,0.22));
#3825=CARTESIAN_POINT('',(168.,-138.25,0.));
#3826=CARTESIAN_POINT('',(168.,-139.,0.175));
#3827=CARTESIAN_POINT('',(168.,-138.25,0.22));
#3828=CARTESIAN_POINT('',(162.,-138.25,0.22));
#3829=CARTESIAN_POINT('',(164.,-138.25,0.22));
#3830=CARTESIAN_POINT('',(166.,-138.25,0.22));
#3831=CARTESIAN_POINT('',(168.,-138.25,0.22));
#3832=CARTESIAN_POINT('',(162.,-138.25,0.));
#3833=CARTESIAN_POINT('',(164.,-138.25,0.));
#3834=CARTESIAN_POINT('',(166.,-138.25,0.));
#3835=CARTESIAN_POINT('',(168.,-138.25,0.));
#3836=CARTESIAN_POINT('',(162.158427066695,-139.257443983379,0.));
#3837=CARTESIAN_POINT('',(162.77228471113,-140.254962655586,0.));
#3838=CARTESIAN_POINT('',(163.386142355565,-141.252481327793,0.));
#3839=CARTESIAN_POINT('',(164.,-142.25,0.));
#3840=CARTESIAN_POINT('',(162.158427066695,-139.257443983379,0.175));
#3841=CARTESIAN_POINT('',(162.77228471113,-140.254962655586,0.175));
#3842=CARTESIAN_POINT('',(163.386142355565,-141.252481327793,0.175));
#3843=CARTESIAN_POINT('',(164.,-142.25,0.175));
#3844=CARTESIAN_POINT('',(162.35,-139.,0.175));
#3845=CARTESIAN_POINT('',(164.233333333333,-139.,0.175));
#3846=CARTESIAN_POINT('',(166.116666666667,-139.,0.175));
#3847=CARTESIAN_POINT('',(168.,-139.,0.175));
#3848=CARTESIAN_POINT('',(162.35,-139.,0.));
#3849=CARTESIAN_POINT('',(164.233333333333,-139.,0.));
#3850=CARTESIAN_POINT('',(166.116666666667,-139.,0.));
#3851=CARTESIAN_POINT('',(168.,-139.,0.));
#3852=CARTESIAN_POINT('',(0.,0.,0.));
ENDSEC;
END-ISO-10303-21;
